# Supplementary material for: Investigation of the thermal deconstruction of β–β′ and 4-O-5 linkages in lignin model oligomers by density functional theory (DFT)
Source: PubMed Central journal article supplement (PMC9941757; doi:10.1039/d2ra07787f), 2023-02-21
Supplement: RA-013-D2RA07787F-s001.pdf [file RA-013-D2RA07787F-s001.pdf]

## Investigation of the thermal deconstruction of $\beta$ - $\beta'$ and 4-O-5 linkages in lignin model oligomers by density functional theory (DFT)

Ross W. Houston<sup>a</sup> and Nourredine H. Abdoulmoumine<sup>a,b\*</sup>

<sup>a</sup>Department of Biosystems Engineering and Soil Science, University of Tennessee, 2506 E. J. Chapman Drive, Knoxville, TN 37996, USA

<sup>b</sup>Center for Renewable Carbon, University of Tennessee, 2506 Jacob Drive, Knoxville, TN 37996. USA

### Supporting Information

#### S.1.Optimized geometries of the initial stereoisomers of MC1

| <b>RRRSSRRR</b> |            |             | H 5.70262269 | 1.43698305  | -0.93965458 |
|-----------------|------------|-------------|--------------|-------------|-------------|
| O 1.81714707    | 4.75311763 | -0.83164502 | H 6.54186447 | 0.26538051  | 0.09460078  |
| C 2.86768026    | 4.16621231 | -0.19099402 | O 5.96391264 | -0.38001978 | -1.78668221 |
| C 5.13923862    | 3.23738791 | 1.09943302  | H 5.59540852 | -1.25815709 | -1.63809541 |
| C 3.96153308    | 5.02610689 | 0.01132056  | O 4.55735491 | -1.33404827 | 0.51272878  |
| C 2.91855949    | 2.85208212 | 0.24506845  | C 3.48449406 | -2.16729491 | 0.38645025  |
| C 4.06888201    | 2.38097281 | 0.88932897  | C 1.29479930 | -3.90339947 | 0.15959529  |
| C 5.08959316    | 4.55990981 | 0.65900090  | C 3.08588004 | -2.65096183 | -0.86945143 |
| H 6.02742481    | 2.87639841 | 1.60675288  | C 2.81060435 | -2.62220479 | 1.51777429  |
| H 2.07646289    | 2.18227214 | 0.10996788  | C 1.72631029 | -3.48286759 | 1.41180416  |
| H 5.91576147    | 5.24183334 | 0.81710906  | C 1.99147705 | -3.50770413 | -0.98074654 |
| C 0.63722544    | 3.98078479 | -0.96768191 | H 1.21917004 | -3.78531942 | 2.32183330  |
| H-0.08829029    | 4.60638873 | -1.48416352 | H 1.67411165 | -3.88081057 | -1.94497233 |
| H 0.25364721    | 3.69799059 | 0.01636398  | O 3.82523826 | -2.21554997 | -1.91389587 |
| H 0.82160484    | 3.07640180 | -1.55421387 | O 3.16772907 | -2.14410187 | 2.75730034  |
| O 3.90027738    | 6.30961942 | -0.41958165 | C 3.37017004 | -2.49351197 | -3.23186913 |
| H 3.03773421    | 6.44318545 | -0.83112714 | H 4.06042101 | -1.97335857 | -3.89201140 |
| C 4.14693337    | 0.92823331 | 1.28373870  | H 2.35749767 | -2.10815750 | -3.37363428 |
| H 4.98542268    | 0.79290542 | 1.98065069  | H 3.40226547 | -3.56739541 | -3.43345011 |
| C 4.42001620    | 0.04009411 | 0.06004220  | C 4.39949749 | -2.67610592 | 3.25856467  |
| H 3.57654267    | 0.10209820 | -0.63756878 | H 4.56169051 | -2.21137987 | 4.22908269  |
| C 5.72711598    | 0.39066358 | -0.63404214 | H 4.31082900 | -3.75880643 | 3.37654641  |

H 5.22078775 -2.43524154 2.58187862  
C 0.04893148 -4.76577052 0.04068534  
C-1.17871821 -4.04640922 0.60365263  
C-1.70054484 -3.23912436 -0.59787008  
C-1.11295668 -3.98647937 -1.81096645  
O-0.29363704 -5.04545089 -1.30339752  
H 0.22233563 -5.72978705 0.52932576  
H-0.94963918 -3.40867175 1.45812101  
H-1.35054642 -2.20824190 -0.57894522  
H-0.51257103 -3.30815150 -2.42443400  
H-1.87821009 -4.44738017 -2.43896502  
C-3.24538100 -3.28807396 -0.43203379  
O-3.50436982 -4.12850352 0.68501508  
C-2.37216267 -4.95216975 0.89825439  
H-3.70740560 -3.72486254 -1.32657650  
H-2.37707693 -5.80711784 0.20811329  
H-2.41234674 -5.31874915 1.92417853  
C-3.81295239 -1.90950071 -0.19692880  
C-4.54846550 0.73991471 0.18426744  
C-4.07991282 -1.10515663 -1.30121889  
C-3.94845932 -1.41976932 1.09680187  
C-4.32916323 -0.09076322 1.28422710  
C-4.45072621 0.22373045 -1.10863943  
H-3.97229825 -1.51379302 -2.29797790  
H-3.76881595 -2.08467486 1.92980266  
O-4.71463624 1.10406439 -2.10914541  
O-4.48732098 0.50520499 2.49376968  
C-4.32587071 -0.29682126 3.64826536  
H-4.52447298 0.35637726 4.49462685  
H-3.30563043 -0.68668142 3.71829339  
H-5.03430207 -1.12973548 3.64830699  
C-4.56867903 0.64269092 -3.44046166

H-4.78843448 1.49550194 -4.07941202  
H-5.27698419 -0.16335199 -3.65096538  
H-3.54598235 0.29969657 -3.62180851  
O-4.87582478 2.05727694 0.35797114  
O 2.93044791 0.55886419 1.90456866  
H 3.05094250 -0.30197112 2.32948677  
C-3.80973220 2.91068151 0.81474949  
H-3.27226744 2.40491151 1.62050779  
C-4.51563458 4.11995954 1.39959190  
H-3.77585034 4.84361387 1.74820848  
H-5.12447022 4.59036046 0.62006577  
O-5.29482955 3.74918030 2.51564959  
H-5.77938107 2.95414060 2.26639622  
C-2.87331588 3.27262682 -0.34714223  
H-2.24408767 4.10065188 0.00383891  
O-3.62049821 3.78956968 -1.42299373  
H-4.27085091 3.11012584 -1.65680943  
C-1.94976483 2.13373121 -0.78548754  
C-0.22684968 0.08637128 -1.62060595  
C-1.29700627 1.32809834 0.15969933  
C-1.70978111 1.91184775 -2.13417224  
C-0.85310930 0.89059749 -2.55309495  
C-0.45121863 0.30968128 -0.25016362  
H-1.45510250 1.48800421 1.21846401  
H-2.19544717 2.54439516 -2.86646000  
H-0.65814096 0.71493844 -3.60472356  
O 0.20649840 -0.56044083 0.56477797  
O 0.59786986 -0.92166336 -2.00886267  
H 0.94219893 -1.35855026 -1.21403367  
C 0.04649179 -0.38709149 1.96271707  
H 0.64926765 -1.16008192 2.43492899  
H 0.41676449 0.59305075 2.27183190

H-1.00721528 -0.51132135 2.23732622

**RRRSSRSS**

O-0.10291281 -2.86870208 0.12065349

C-1.29568747 -2.40743016 -0.36426268

C-3.56794313 -1.38537694 -1.57601710

C-1.17217295 -1.52460969 -1.44404166

C-2.54958524 -2.74168144 0.12487766

C-3.70214410 -2.22237786 -0.47267884

C-2.30991984 -1.02369305 -2.04907380

H-4.43835782 -0.97110202 -2.06938690

H-2.65936859 -3.40208563 0.97505549

H-2.19873986 -0.34874834 -2.88979883

C-0.13467659 -3.71758015 1.25322982

H-0.67389608 -4.64203264 1.03009812

H 0.90260698 -3.94265622 1.49246611

H-0.60242949 -3.21500861 2.10484728

O 0.05580544 -1.16819636 -1.91432718

H 0.73542085 -1.48065908 -1.30174109

C-5.06417601 -2.60717885 0.10972085

H-5.46133517 -3.44610237 -0.47340703

C-6.10328871 -1.48118592 0.04478244

H-6.14043675 -1.02466484 -0.94618361

C-7.50046937 -1.95252235 0.40360421

H-7.80340922 -2.75111537 -0.27678701

H-7.49413126 -2.34699250 1.42529100

O-8.43318142 -0.90387663 0.25752888

H-8.04455571 -0.12628219 0.67359677

O-5.80894763 -0.46465645 1.02169998

C-4.79316777 0.40468098 0.72453356

C-2.70124215 2.14945295 0.14845231

C-4.94409615 1.37844682 -0.26325631

C-3.59523774 0.32301523 1.43575794

C-2.54573237 1.19314833 1.15101416

C-3.89454590 2.24821964 -0.55918243

H-1.62528877 1.15032817 1.71876756

H-3.99081119 3.01863883 -1.31183561

O-6.14740728 1.37582105 -0.89394560

O-3.54008871 -0.65824764 2.37781455

C-6.36444383 2.35021167 -1.89661148

H-7.37548898 2.18308344 -2.26051930

H-5.65277859 2.23252395 -2.71950748

H-6.28224429 3.36052183 -1.48636205

C-2.31159414 -0.82965754 3.06120281

H-2.45276034 -1.68116991 3.72461988

H-1.50131076 -1.03764809 2.35549250

H-2.05749863 0.05765201 3.64654931

C-1.59803076 3.16957031 -0.09299297

C-0.19287713 2.56866338 -0.21288964

C-0.03624317 2.30063578 -1.72813703

C-1.18372781 3.12113139 -2.35012604

O-1.77124284 3.88590200 -1.30260650

H-1.64460438 3.90939598 0.71177345

H-0.06770663 1.66826427 0.38016186

H-0.12375645 1.24179111 -1.96810442

H-1.93551962 2.45246975 -2.78671088

H-0.84486921 3.82527583 -3.11158192

C 1.36920290 2.84787961 -2.03287345

O 1.51838315 3.94387851 -1.15018547

C 0.91828017 3.58985222 0.09272075

H 1.43836940 3.24833750 -3.04841329

H 0.53791621 4.51088280 0.53679789

H 1.66432493 3.14781051 0.76457796

C 2.46041786 1.80397911 -1.83126147  
C 4.40054008 -0.14037123 -1.38747490  
C 2.41101033 0.60530511 -2.54013424  
C 3.50515813 2.05985131 -0.95008862  
C 4.47237533 1.08281341 -0.72554456  
C 3.38857223 -0.36319743 -2.32542048  
H 1.60078912 0.41709645 -3.23199102  
H 3.54711837 3.01998378 -0.45717876  
O 3.43312167 -1.57285566 -2.94258419  
O 5.51431497 1.22120876 0.14148543  
C 5.58014806 2.42398697 0.88382444  
H 6.43419590 2.31902539 1.55112795  
H 5.73610336 3.28226838 0.22468212  
H 4.66534688 2.57173114 1.46779859  
C 2.57535997 -1.77838169 -4.05610688  
H 2.83591884 -2.75785627 -4.45056320  
H 1.52580614 -1.76861611 -3.75408149  
H 2.75079289 -1.01430636 -4.81897250  
O 5.34241242 -1.10215589 -1.13630078  
O-4.95198192 -3.08141758 1.43387217  
H-4.72161510 -2.31397221 1.97968062  
C 4.89460223 -2.24267469 -0.38142004  
H 3.90952630 -2.54554928 -0.74479500  
C 5.88701180 -3.33832329 -0.72326466

**SSRSSRRR**

O-1.29097099 -4.42193784 1.11766354  
C-2.31623324 -3.96672278 0.34474984  
C-4.42257771 -3.30851227 -1.33137756  
C-2.90251294 -4.95559631 -0.46440718  
C-2.77894233 -2.66188803 0.30072222  
C-3.84872168 -2.32255615 -0.53974890  
C-3.95107336 -4.62090007 -1.30100220

H 5.64731901 -4.24088391 -0.15682263  
H 6.89359742 -3.00773201 -0.44444599  
O 5.80926609 -3.67021419 -2.09179690  
H 5.74229812 -2.84048203 -2.57837808  
C 4.86472248 -1.90967186 1.11748922  
H 4.78688043 -2.86057988 1.65733254  
O 6.09610291 -1.34693635 1.50781913  
H 6.24725742 -0.58816798 0.92374921  
C 3.67735041 -1.03628914 1.53107071  
C 1.53788198 0.57768518 2.34632611  
C 3.87986192 -0.01508512 2.46342821  
C 2.39425863 -1.24782480 1.03665307  
C 1.32833380 -0.44089085 1.43363445  
C 2.82282082 0.78812419 2.86241848  
H 4.87605375 0.13624289 2.85778648  
H 2.19706921 -2.05213309 0.33767204  
H 0.32958479 -0.60098921 1.04001228  
O 2.90297373 1.82164355 3.75553036  
O 0.50016539 1.35990382 2.75948932  
H 0.84319803 1.99025644 3.40594989  
C 4.09752047 1.94246884 4.50854079  
H 4.94352914 2.19777378 3.86492607  
H 4.31291007 1.01196729 5.04052766  
H 3.92815024 2.74671349 5.22051747

H-5.25121095 -3.05480846 -1.98308417  
H-2.29737692 -1.90910302 0.91157653  
H-4.39383485 -5.39668463 -1.91336210  
C-0.76927057 -3.53866353 2.09913127  
H-1.55815242 -3.24023025 2.79658900  
H-0.32432306 -2.65660648 1.63533329  
H-0.00005697 -4.09732184 2.62781269

O-2.43255190 -6.22516152 -0.42699171  
H-1.71594365 -6.25819355 0.21914405  
C-4.36945221 -0.90486727 -0.61434672  
H-5.38860981 -0.93209520 -1.02083290  
C-4.42814133 -0.22564709 0.75834204  
H-3.45384483 -0.27546786 1.24871042  
C-5.49563152 -0.84144750 1.64574304  
H-5.38004354 -1.92705576 1.65915276  
H-6.47513252 -0.60275135 1.20910445  
O-5.41395782 -0.39213320 2.97820618  
H-5.16586945 0.53953377 2.95293848  
O-4.78073350 1.16616079 0.59711668  
C-3.74268346 2.05880745 0.57920163  
C-1.57502718 3.81329407 0.50055875  
C-2.96067049 2.27429411 1.72042433  
C-3.47034336 2.79544199 -0.57146359  
C-2.39439483 3.68131695 -0.60982087  
C-1.86649762 3.12891613 1.67831666  
H-2.18110300 4.26627454 -1.49195047  
H-1.23905603 3.26639671 2.55089972  
O-3.35015999 1.57662149 2.81951726  
O-4.28252543 2.54291948 -1.64129568  
C-2.48890158 1.55644248 3.94205271  
H-1.49748835 1.18911542 3.66054828  
H-2.40279631 2.55030354 4.39002266  
H-2.94530877 0.87165069 4.65368278  
C-4.07441891 3.30526562 -2.81891943  
H-3.08309898 3.11380185 -3.24002426  
H-4.18970692 4.37225493 -2.61397701  
H-4.83926931 2.98316985 -3.52165924  
C-0.32247777 4.66679669 0.43207144  
C 0.94662050 3.80349821 0.43346851

C 1.14031523 3.47365689 -1.05674731  
C 0.46985831 4.66987570 -1.75853321  
O-0.23801384 5.41524462 -0.76694621  
H-0.32542466 5.38510279 1.25761112  
H 0.83490865 2.90496824 1.03823665  
H 0.68025141 2.52250738 -1.32625473  
H-0.22112062 4.33758022 -2.53948139  
H 1.20773296 5.34168957 -2.20329047  
C 2.66448136 3.47759702 -1.21867125  
O 3.10611101 4.49547138 -0.33789567  
C 2.22827048 4.58156125 0.78441230  
H 2.95693177 3.78906150 -2.22637404  
H 2.02870532 5.64117410 0.95990931  
H 2.71581157 4.16094642 1.66989845  
C 3.30161936 2.12997273 -0.93018197  
C 4.47397660 -0.34685944 -0.46366294  
C 4.18351566 1.98024408 0.13199129  
C 3.02094336 1.06113980 -1.78117326  
C 3.62360471 -0.17345077 -1.55905086  
C 4.77086309 0.73478902 0.36277837  
H 4.42868620 2.84105301 0.73763881  
H 2.34450872 1.20398111 -2.61465327  
O 5.63955122 0.46271371 1.37153223  
O 3.44371718 -1.27358019 -2.33488955  
C 2.55395614 -1.16045888 -3.43070655  
H 2.52579893 -2.14434745 -3.89562834  
H 2.92204068 -0.42759612 -4.15451722  
H 1.55007044 -0.88119368 -3.09537488  
C 5.98029988 1.51813353 2.25004118  
H 6.47085777 2.33399930 1.71194787  
H 6.66845864 1.09085591 2.97566031  
H 5.09392707 1.90097265 2.76508610

O 5.03541921 -1.57293628 -0.22988866  
O-3.54408588 -0.16618006 -1.51195307  
H-3.98153131 0.68178700 -1.68578029  
C 4.52624309 -2.29775864 0.90776286  
H 4.36502720 -1.59923189 1.73184092  
C 5.64988917 -3.24000302 1.29492220  
H 5.32604180 -3.87804404 2.12012561  
H 5.89477049 -3.87593460 0.43745012  
O 6.77502028 -2.51532417 1.74297377  
H 6.88757390 -1.77065065 1.14072990  
C 3.23047441 -3.02575339 0.52709783  
H 3.01366421 -3.74681239 1.32404855  
O 3.44498283 -3.79414666 -0.63582057  
H 3.76615847 -3.17890749 -1.31196162  
C 2.03338363 -2.08478626 0.37793763

**SSRSSRSS**

O-3.85358031 3.85960224 0.68167508  
C-3.39017848 2.82309933 -0.08366332  
C-2.21000506 0.76417547 -1.51032869  
C-2.02527369 2.55914953 0.07967198  
C-4.15349261 2.05868930 -0.94907504  
C-3.57262247 1.00456763 -1.65933056  
C-1.43583855 1.53463602 -0.64260822  
H-1.72551850 -0.03708834 -2.05627039  
H-5.21113538 2.24700629 -1.07591566  
H-0.37490667 1.34014981 -0.51597546  
C-5.16468957 4.32820561 0.41848558  
H-5.30984114 5.19901398 1.05339284  
H-5.26896439 4.61102972 -0.63238554  
H-5.90963164 3.56729348 0.66632069  
O-1.29230227 3.32307929 0.94055364  
H-1.88387770 3.98565440 1.32015219

C-0.13838705 -0.34487124 -0.01591123  
C 1.13987449 -2.29357422 -0.67781803  
C 1.80609925 -1.02098139 1.24624048  
C 0.72656452 -0.15963674 1.05179793  
C 0.07866612 -1.42575871 -0.88743165  
H 1.30959480 -3.12504977 -1.34974192  
H 2.46941437 -0.83498010 2.08259911  
H 0.53699786 0.66694214 1.72736698  
O-0.80927254 -1.49819505 -1.91409285  
O-1.17853711 0.49494121 -0.19972551  
H-1.81257065 0.13692625 -0.85522336  
C-0.90497041 -2.71795987 -2.62699173  
H-0.98131951 -3.56394316 -1.93945575  
H-1.81451790 -2.64727583 -3.22005948  
H-0.04030309 -2.85792585 -3.28384777

C-4.46672438 0.16946740 -2.57916930  
H-4.30609408 0.50364194 -3.61032319  
C-4.16401862 -1.33301412 -2.52917501  
H-3.09070867 -1.52723259 -2.58859898  
C-4.85250576 -2.11688214 -3.63052563  
H-4.56624455 -1.71151474 -4.60359345  
H-5.93727962 -2.01589735 -3.51556445  
O-4.45176138 -3.46929106 -3.60475089  
H-4.41187441 -3.73438060 -2.67823696  
O-4.67839766 -1.89223606 -1.30509860  
C-3.87175400 -1.76471161 -0.20556442  
C-2.20960332 -1.46057016 2.00085200  
C-4.22906322 -0.89594142 0.82237488  
C-2.70627593 -2.52837635 -0.09803773  
C-1.86398616 -2.36686639 0.99730092  
C-3.39540937 -0.74022670 1.93217227

|                     |                    |                    |                     |                    |                    |
|---------------------|--------------------|--------------------|---------------------|--------------------|--------------------|
| <u>H-0.94742039</u> | <u>-2.93753165</u> | <u>1.07901038</u>  | <u>C 2.70632230</u> | <u>2.52843457</u>  | <u>-0.09811889</u> |
| <u>H-3.65417052</u> | <u>-0.08045051</u> | <u>2.74809144</u>  | <u>C 4.22903871</u> | <u>0.89594544</u>  | <u>0.82231185</u>  |
| <u>O-5.40510622</u> | <u>-0.23386110</u> | <u>0.64431025</u>  | <u>H 3.65412803</u> | <u>0.08051668</u>  | <u>2.74804356</u>  |
| <u>O-2.48562639</u> | <u>-3.38180400</u> | <u>-1.13062307</u> | <u>H 0.94750078</u> | <u>2.93770671</u>  | <u>1.07894340</u>  |
| <u>C-5.78238150</u> | <u>0.69372912</u>  | <u>1.64322843</u>  | <u>O 5.40504568</u> | <u>0.23380245</u>  | <u>0.64425559</u>  |
| <u>H-5.02553712</u> | <u>1.47751893</u>  | <u>1.75624257</u>  | <u>O 2.48571302</u> | <u>3.38187116</u>  | <u>-1.13070518</u> |
| <u>H-6.72128969</u> | <u>1.13087025</u>  | <u>1.30703421</u>  | <u>C 1.33618866</u> | <u>4.21006804</u>  | <u>-1.06633726</u> |
| <u>H-5.93816959</u> | <u>0.19347340</u>  | <u>2.60302654</u>  | <u>H 0.41926294</u> | <u>3.61562456</u>  | <u>-1.05390697</u> |
| <u>C-1.33604377</u> | <u>-4.20992000</u> | <u>-1.06626766</u> | <u>H 1.36487882</u> | <u>4.84609543</u>  | <u>-0.17711544</u> |
| <u>H-1.36492064</u> | <u>-4.82481114</u> | <u>-1.96286498</u> | <u>H 1.36508542</u> | <u>4.82493672</u>  | <u>-1.96294907</u> |
| <u>H-1.36466687</u> | <u>-4.84593013</u> | <u>-0.17703191</u> | <u>C 5.78230414</u> | <u>-0.69373751</u> | <u>1.64322799</u>  |
| <u>H-0.41915895</u> | <u>-3.61541113</u> | <u>-1.05387742</u> | <u>H 5.02543128</u> | <u>-1.47749068</u> | <u>1.75630533</u>  |
| <u>C-1.26382317</u> | <u>-1.28769529</u> | <u>3.17932222</u>  | <u>H 5.93812699</u> | <u>-0.19342387</u> | <u>2.60298980</u>  |
| <u>C 0.10321162</u> | <u>-0.76126098</u> | <u>2.73433990</u>  | <u>H 6.72118904</u> | <u>-1.13093628</u> | <u>1.30704416</u>  |
| <u>C-0.10320678</u> | <u>0.76143481</u>  | <u>2.73430863</u>  | <u>O 4.67839316</u> | <u>1.89216211</u>  | <u>-1.30519887</u> |
| <u>C-1.23163060</u> | <u>0.96319193</u>  | <u>3.75985490</u>  | <u>O-5.83516857</u> | <u>0.38361984</u>  | <u>-2.31284428</u> |
| <u>O-1.72366251</u> | <u>-0.33047782</u> | <u>4.11728321</u>  | <u>H-6.01803138</u> | <u>-0.05477080</u> | <u>-1.46798751</u> |
| <u>H-1.18114078</u> | <u>-2.23962920</u> | <u>3.71244577</u>  | <u>C 4.16400043</u> | <u>1.33286301</u>  | <u>-2.52923651</u> |
| <u>H 0.39385148</u> | <u>-1.13889840</u> | <u>1.75851617</u>  | <u>H 3.09069003</u> | <u>1.52707688</u>  | <u>-2.58866346</u> |
| <u>H-0.39383953</u> | <u>1.13903371</u>  | <u>1.75846706</u>  | <u>C 4.85247238</u> | <u>2.11666986</u>  | <u>-3.63064286</u> |
| <u>H-2.04055145</u> | <u>1.56455745</u>  | <u>3.33015362</u>  | <u>H 4.56620147</u> | <u>1.71124422</u>  | <u>-4.60368322</u> |
| <u>H-0.87856406</u> | <u>1.44086370</u>  | <u>4.67666583</u>  | <u>H 5.93724813</u> | <u>2.01569798</u>  | <u>-3.51568661</u> |
| <u>C 1.26383193</u> | <u>1.28788264</u>  | <u>3.17927068</u>  | <u>O 4.45172070</u> | <u>3.46907842</u>  | <u>-3.60494427</u> |
| <u>O 1.72365603</u> | <u>0.33070916</u>  | <u>4.11728283</u>  | <u>H 4.41183690</u> | <u>3.73422069</u>  | <u>-2.67844524</u> |
| <u>C 1.23163966</u> | <u>-0.96297771</u> | <u>3.75989200</u>  | <u>C 4.46671560</u> | <u>-0.16961943</u> | <u>-2.57915278</u> |
| <u>H 1.18116355</u> | <u>2.23984661</u>  | <u>3.71234225</u>  | <u>H 4.30610736</u> | <u>-0.50384196</u> | <u>-3.61029458</u> |
| <u>H 0.87858750</u> | <u>-1.44062745</u> | <u>4.67671932</u>  | <u>O 5.83516101</u> | <u>-0.38374680</u> | <u>-2.31280230</u> |
| <u>H 2.04056231</u> | <u>-1.56434583</u> | <u>3.33019877</u>  | <u>H 6.01800677</u> | <u>0.05466958</u>  | <u>-1.46795532</u> |
| <u>C 2.20961445</u> | <u>1.46069128</u>  | <u>2.00079338</u>  | <u>C 3.57260930</u> | <u>-1.00468201</u> | <u>-1.65928362</u> |
| <u>C 3.87175859</u> | <u>1.76470522</u>  | <u>-0.20564681</u> | <u>C 2.02527194</u> | <u>-2.55916346</u> | <u>0.07982104</u>  |
| <u>C 3.39538606</u> | <u>0.74029048</u>  | <u>1.93211572</u>  | <u>C 4.15347921</u> | <u>-2.05877076</u> | <u>-0.94898127</u> |
| <u>C 1.86403438</u> | <u>2.36699006</u>  | <u>0.99723290</u>  | <u>C 2.20999117</u> | <u>-0.76428094</u> | <u>-1.51028566</u> |

C 1.43583245 -1.53469063 -0.64251568  
C 3.39017097 -2.82313079 -0.08351768  
H 5.21111993 -2.24710031 -1.07581886  
H 1.72550104 0.03695008 -2.05627169  
H 0.37490032 -1.34019906 -0.51588680  
O 3.85357954 -3.85959362 0.68187169

O 1.29230837 -3.32303088 0.94076347  
H 1.88388172 -3.98559188 1.32038965  
C 5.16467314 -4.32823559 0.41867097  
H 5.90963683 -3.56732820 0.66645791  
H 5.30982204 -5.19901979 1.05361198  
H 5.26891881 -4.61110470 -0.63219072

## S.2.Optimized geometries of the initial stereoisomers of MC2

### RSSRRSSR

C 1.88429498 4.02396804 -1.21780430  
C 2.29284171 2.13306786 0.78668251  
C 0.84277555 3.70341490 -0.34742435  
C 3.09492240 3.34860292 -1.13857644  
C 3.29194733 2.38251461 -0.16221359  
C 1.06674181 2.77771029 0.66313307  
H 3.89623043 3.53582834 -1.84309569  
H 0.28361238 2.54177330 1.37311489  
O 4.48644479 1.68258021 -0.16205294  
C 4.41533988 0.30726543 -0.30634060  
C 4.43990135 -2.44951590 -0.33730811  
C 5.59423216 -0.36079738 0.01843531  
C 3.27133813 -0.37793636 -0.67860661  
C 3.26555323 -1.76774357 -0.64618559  
C 5.60673445 -1.75797071 -0.02788811  
H 4.47388999 -3.53362110 -0.30528913  
H 2.38059426 0.16621997 -0.95868254  
C 1.94805197 -2.51281362 -0.79394358  
O 0.90969861 -1.67036993 -1.26300094  
C 0.29002840 -1.01116113 -0.14513584  
C 0.79716530 -1.70085361 1.13226049  
C 1.45985497 -2.97410579 0.58872087

H 2.04881096 -3.33923487 -1.50402154  
H 0.51136193 0.05868266 -0.16360571  
H -0.78749510 -1.13812875 -0.25215532  
C 0.28722950 -3.98107137 0.57940483  
O -0.83411374 -3.34436289 1.19085416  
C -0.36469087 -2.24255023 1.95956299  
H 0.54462777 -4.88693936 1.13750784  
H -0.00995044 -4.26437688 -0.43317919  
H 0.00725556 -2.60811818 2.92878407  
H 1.48139959 -1.06740698 1.69487566  
H 2.28325479 -3.32265501 1.21149305  
H 1.73843216 4.77530320 -1.98727015  
C -0.52099803 4.32968083 -0.53367662  
O -1.31191068 4.08477017 0.62367071  
C -2.64596040 3.78170976 0.24319767  
C -2.50290741 3.04729079 -1.07860706  
C -1.33813558 3.78545790 -1.75769005  
H -0.39300919 5.41232108 -0.65430440  
H -3.09857261 3.18710708 1.03937277  
H -3.22656509 4.70394803 0.11288469  
H -3.41459190 3.06634888 -1.67719978  
H -1.68092252 4.61388649 -2.37892385



|   |             |             |             |   |             |             |             |
|---|-------------|-------------|-------------|---|-------------|-------------|-------------|
| C | -0.71156288 | 2.67277963  | -2.58483029 | O | 6.69953600  | 0.32316026  | 0.41898818  |
| O | -0.78326759 | 1.52533720  | -1.75743032 | O | 2.42077561  | 1.21923572  | 1.79000584  |
| C | -1.95346931 | 1.60671027  | -0.94049045 | O | -3.06718131 | -2.84938915 | -2.79120527 |
| H | 0.33323181  | 2.82456904  | -2.85324826 | O | -5.54200956 | -2.66766511 | -1.86595686 |
| H | -1.29794455 | 2.52577650  | -3.50162993 | O | -5.14424118 | -0.87355208 | 2.04764214  |
| H | -1.61641651 | 1.44183303  | 0.09127718  | O | -4.45922642 | 1.60904603  | 2.60787849  |
| C | -2.94889308 | 0.52107644  | -1.28553097 | C | -5.56200580 | -2.19756285 | 1.75779480  |
| C | -4.70256876 | -1.60963946 | -1.69691972 | H | -5.24677564 | -2.87943170 | 2.55272215  |
| C | -4.25783293 | 0.58599931  | -0.82385508 | H | -5.16325824 | -2.53224440 | 0.79722568  |
| C | -2.51877682 | -0.61115388 | -1.98295139 | H | -6.64823508 | -2.16810964 | 1.70748176  |
| C | -3.38417168 | -1.67651443 | -2.17057458 | C | -1.70802732 | -3.03391377 | -3.15663370 |
| C | -5.13758383 | -0.47316780 | -1.03971254 | H | -1.04805551 | -2.89351087 | -2.29553213 |
| H | -4.59910625 | 1.45314497  | -0.26664297 | H | -1.63219021 | -4.05204607 | -3.53207608 |
| H | -1.49840425 | -0.64724729 | -2.34218002 | H | -1.42069766 | -2.33050133 | -3.94311451 |
| H | -6.15810253 | -0.44075592 | -0.67726352 | C | 7.83246745  | -2.28314001 | -0.56484115 |
| C | -1.47007095 | -1.23642609 | 2.17883736  | H | 7.55990799  | -2.60178027 | -1.57557624 |
| C | -3.47543065 | 0.67414595  | 2.49685651  | H | 8.62898833  | -2.91947102 | -0.18404165 |
| C | -2.80803747 | -1.59888684 | 1.99835466  | H | 8.16496635  | -1.24416883 | -0.57825925 |
| C | -1.14958338 | 0.06971793  | 2.53310347  | C | 3.60914772  | 1.26583265  | 2.58064896  |
| C | -2.15213589 | 1.02713456  | 2.68981992  | H | 3.31787508  | 0.98012576  | 3.59064243  |
| C | -3.80507682 | -0.65088846 | 2.17139943  | H | 4.02288983  | 2.27653740  | 2.59309672  |
| H | -3.04146592 | -2.61352338 | 1.70517730  | H | 4.35439561  | 0.56127131  | 2.20633907  |
| H | -0.11158487 | 0.36108810  | 2.66216826  | H | 6.48770535  | 1.26439332  | 0.39692251  |
| H | -1.91542121 | 2.05432844  | 2.94565553  | H | -5.30403945 | 1.15876208  | 2.48261988  |
| O | 6.72720832  | -2.45686878 | 0.31765854  | H | -5.05621909 | -3.35295111 | -2.34131621 |

### S.3.Optimized geometries of the radical species produced from the RRRSSRRR stereoisomer of MC1

#### $\beta$ - $\beta'$ Cleavage

|   |            |            |             |   |            |            |            |
|---|------------|------------|-------------|---|------------|------------|------------|
| O | 1.49946136 | 4.90709098 | -0.86300285 | C | 4.84237974 | 3.54129002 | 1.14238293 |
| C | 2.56091653 | 4.36733216 | -0.19926890 | C | 3.61581228 | 5.27175007 | 0.01498296 |

|               |             |             |               |             |             |
|---------------|-------------|-------------|---------------|-------------|-------------|
| C 2.65574601  | 3.05990445  | 0.24955906  | C 2.27196504  | -3.53527819 | -1.03063601 |
| C 3.81139772  | 2.64086235  | 0.91967062  | H 1.10593286  | -3.70748722 | 2.16001051  |
| C 4.74907648  | 4.85664444  | 0.68792042  | H 2.13338982  | -3.99277809 | -2.00165801 |
| H 5.73352315  | 3.22100237  | 1.67144723  | O 4.01678161  | -2.06124694 | -1.84081401 |
| H 1.84306309  | 2.35589828  | 0.10725287  | O 2.86053994  | -1.90572460 | 2.73244232  |
| H 5.54421867  | 5.57241281  | 0.85525471  | C 3.65206236  | -2.32682621 | -3.18921647 |
| C 0.35300084  | 4.08759269  | -1.01181581 | H 4.31463199  | -1.71324577 | -3.79548899 |
| H -0.38363960 | 4.67734983  | -1.55394145 | H 2.61253697  | -2.03596428 | -3.36193363 |
| H -0.04160104 | 3.80484810  | -0.03206466 | H 3.79999631  | -3.38212262 | -3.43206556 |
| H 0.58506770  | 3.18270054  | -1.57988538 | C 4.04081331  | -2.37111838 | 3.39734141  |
| O 3.51122678  | 6.54825783  | -0.42874829 | H 4.07059899  | -1.86494861 | 4.36023818  |
| H 2.65166319  | 6.64283651  | -0.85703832 | H 3.97673270  | -3.45156757 | 3.54738277  |
| C 3.93314760  | 1.19768790  | 1.33989740  | H 4.92777680  | -2.12239439 | 2.81207745  |
| H 4.75645070  | 1.10638078  | 2.06242479  | C 0.49471628  | -5.10941825 | -0.20072559 |
| C 4.28114914  | 0.29819364  | 0.14177467  | C -0.49423768 | -5.32908234 | 0.91001038  |
| H 3.47082597  | 0.32404352  | -0.59640636 | C -1.33113793 | -3.01885310 | -0.85456009 |
| C 5.61220228  | 0.68722184  | -0.48553847 | C -0.67564386 | -3.81142568 | -1.92492056 |
| H 5.56955991  | 1.73289565  | -0.79083594 | O -0.10916045 | -5.06365531 | -1.48368796 |
| H 6.38829363  | 0.58798809  | 0.28796605  | H 1.111105643 | -6.01914980 | -0.25459827 |
| O 5.94201031  | -0.06783023 | -1.62448734 | H -0.08780577 | -5.57190284 | 1.88429843  |
| H 5.61895739  | -0.96588131 | -1.49102665 | H -0.75099280 | -2.31217023 | -0.27177521 |
| O 4.43440414  | -1.06431620 | 0.62992498  | H 0.09696318  | -3.20662830 | -2.40581226 |
| C 3.43949560  | -1.97253033 | 0.41609438  | H -1.40309459 | -4.11041211 | -2.68455491 |
| C 1.48836271  | -3.96937401 | 0.04259970  | C -2.69052792 | -3.35618595 | -0.32476270 |
| C 3.22720200  | -2.54054400 | -0.85357865 | O -2.61857752 | -4.09660099 | 0.88519716  |
| C 2.67794716  | -2.44702094 | 1.47976284  | C -1.97637868 | -5.37070727 | 0.73292438  |
| C 1.69523696  | -3.41699664 | 1.29978168  | H -3.23404703 | -3.95600049 | -1.07088989 |

|                                                      |             |             |               |             |             |
|------------------------------------------------------|-------------|-------------|---------------|-------------|-------------|
| H -2.23229028                                        | -5.78763988 | -0.24839362 | C -4.85695391 | 3.90050299  | 1.23523069  |
| H -2.41932097                                        | -6.00279796 | 1.50267643  | H -4.19295420 | 4.71657764  | 1.52761585  |
| C -3.44069596                                        | -2.06423744 | -0.08676604 | H -5.51355369 | 4.25399728  | 0.43317708  |
| C -4.53701383                                        | 0.46494023  | 0.22248018  | O -5.58993863 | 3.52795035  | 2.38161495  |
| C -3.83787126                                        | -1.34366770 | -1.21152309 | H -6.00096256 | 2.67864733  | 2.18520703  |
| C -3.62575939                                        | -1.55911151 | 1.19258045  | C -3.15271837 | 3.11196071  | -0.47590804 |
| C -4.18425149                                        | -0.28691381 | 1.34314513  | H -2.60703677 | 4.01826018  | -0.18248488 |
| C -4.39374889                                        | -0.07996918 | -1.05546107 | O -3.95959307 | 3.49076264  | -1.56649467 |
| H -3.67150356                                        | -1.76210254 | -2.19607297 | H -4.53245427 | 2.73312551  | -1.75878284 |
| H -3.32419046                                        | -2.15645818 | 2.04123313  | C -2.11713884 | 2.05418070  | -0.86869385 |
| O -4.78756881                                        | 0.72053059  | -2.08103401 | C -0.16251152 | 0.18555765  | -1.62217768 |
| O -4.38220635                                        | 0.33090089  | 2.53635530  | C -1.41658006 | 1.32811053  | 0.10550693  |
| C -4.10969705                                        | -0.40820801 | 3.71211563  | C -1.81942322 | 1.83386051  | -2.20667855 |
| H -4.37734804                                        | 0.24231385  | 4.54133676  | C -0.84615760 | 0.90329644  | -2.58477510 |
| H -3.04898514                                        | -0.66846718 | 3.77980825  | C -0.46170058 | 0.39547092  | -0.26427342 |
| H -4.71061908                                        | -1.32106801 | 3.74784963  | H -1.62260351 | 1.47878632  | 1.15696098  |
| C -4.58553175                                        | 0.23979326  | -3.39848427 | H -2.34850371 | 2.39942297  | -2.96361153 |
| H -4.92792880                                        | 1.03113853  | -4.06211324 | H -0.60366289 | 0.73655336  | -3.62790381 |
| H -5.17413946                                        | -0.66481726 | -3.57451827 | O 0.24670491  | -0.39616166 | 0.58527363  |
| H -3.52561652                                        | 0.03918540  | -3.57912431 | O 0.79165124  | -0.72172256 | -1.96629641 |
| O -5.01252024                                        | 1.74177406  | 0.35376023  | H 1.14451091  | -1.11078356 | -1.15127796 |
| O 2.71509569                                         | 0.80067123  | 1.93288874  | C -0.03514978 | -0.27997933 | 1.97111057  |
| H 2.82059100                                         | -0.08807784 | 2.30129928  | H 0.59201418  | -1.01343481 | 2.47258737  |
| C -4.03414132                                        | 2.73219289  | 0.72369131  | H 0.22309667  | 0.71911001  | 2.32919122  |
| H -3.43796952                                        | 2.34590683  | 1.55399206  | H -1.09106979 | -0.50391031 | 2.15504063  |
| <b><u>β-β' bottomC<sub>α</sub>-C<sub>β</sub></u></b> |             |             |               |             |             |
| O 2.66040799                                         | 4.60349874  | -0.85924713 | C 3.58221672  | 3.79730272  | -0.26082776 |

|              |             |             |               |             |             |
|--------------|-------------|-------------|---------------|-------------|-------------|
| C 5.63909030 | 2.38788154  | 0.95097994  | C 2.56086678  | -3.02678571 | 1.56918443  |
| C 4.82984403 | 4.41287097  | -0.05631466 | C 1.43540969  | -3.82074862 | 1.66400978  |
| C 3.37328471 | 2.48594483  | 0.13502435  | C 1.33698728  | -3.93360266 | -0.76690946 |
| C 4.41392297 | 1.77294153  | 0.74193811  | H 1.04668122  | -4.06333679 | 2.64650929  |
| C 5.85066225 | 3.70774629  | 0.55132355  | H 0.90017901  | -4.35053992 | -1.66325929 |
| H 6.44433446 | 1.83831364  | 1.42609635  | O 3.11277668  | -2.82352152 | -1.98752744 |
| H 2.41233487 | 2.00348199  | -0.00375755 | O 3.12395669  | -2.52100657 | 2.71825719  |
| H 6.80056658 | 4.20305887  | 0.70921706  | C 2.50921035  | -3.17641176 | -3.22431569 |
| C 1.37724000 | 4.04224306  | -1.07299510 | H 3.15171707  | -2.75132816 | -3.99194424 |
| H 0.76060488 | 4.81882820  | -1.52167632 | H 1.50924773  | -2.74253618 | -3.29749159 |
| H 0.94034274 | 3.72386287  | -0.12380517 | H 2.46722606  | -4.26321266 | -3.33670380 |
| H 1.43527180 | 3.18084551  | -1.74347441 | C 4.36352169  | -3.13690163 | 3.08446643  |
| O 5.02139006 | 5.69626457  | -0.44779971 | H 4.69810519  | -2.63734604 | 3.99155402  |
| H 4.19873834 | 6.01230055  | -0.84093671 | H 4.20062461  | -4.19871942 | 3.28512376  |
| C 4.21031446 | 0.32168181  | 1.08933900  | H 5.10033160  | -3.01112516 | 2.28963034  |
| H 5.05120056 | -0.01163814 | 1.71223758  | C -0.38574302 | -5.04953726 | 0.62445709  |
| C 4.20634386 | -0.56174705 | -0.16618056 | C -3.51494994 | -4.06848853 | 0.74164943  |
| H 3.28456821 | -0.39555362 | -0.73696914 | C -2.58706266 | -3.38274856 | -0.20750689 |
| C 5.43164399 | -0.35662645 | -1.04320408 | C -1.84922959 | -4.36410679 | -1.12881628 |
| H 5.47258373 | 0.68311842  | -1.36898738 | O -1.17461735 | -5.40717589 | -0.41278063 |
| H 6.32641593 | -0.55880680 | -0.43566836 | H -0.66914171 | -5.46762380 | 1.58455472  |
| O 5.41416489 | -1.16253980 | -2.19621167 | H -3.21736506 | -4.65753450 | 1.59629789  |
| H 4.98362900 | -1.99478906 | -1.96947985 | H -1.85257194 | -2.73905483 | 0.29062560  |
| O 4.25256760 | -1.94920626 | 0.26305238  | H -1.14849600 | -3.80550360 | -1.75749141 |
| C 3.09676567 | -2.66440399 | 0.33041088  | H -2.56625518 | -4.88439157 | -1.76518903 |
| C 0.78323004 | -4.26913446 | 0.49621767  | C -3.57713003 | -2.56080300 | -1.05865664 |
| C 2.48418988 | -3.16007943 | -0.84027208 | O -4.78510730 | -3.32299889 | -1.04046474 |

|               |             |             |               |             |             |
|---------------|-------------|-------------|---------------|-------------|-------------|
| C -4.91512628 | -3.93052493 | 0.23964324  | H -2.64672059 | 2.79813857  | 1.87867680  |
| H -3.26433181 | -2.52025305 | -2.10559279 | C -3.54831114 | 4.72491582  | 1.73449975  |
| H -5.43423807 | -4.88474030 | 0.10808382  | H -2.70351277 | 5.26655757  | 2.16466916  |
| H -5.53274647 | -3.30058130 | 0.89953961  | H -4.01146088 | 5.35336713  | 0.96662103  |
| C -3.79284094 | -1.14211687 | -0.57498914 | O -4.44424531 | 4.44661960  | 2.78813113  |
| C -4.14218531 | 1.50891606  | 0.21040049  | H -5.09087369 | 3.82063824  | 2.44464357  |
| C -3.97753170 | -0.15234588 | -1.53329205 | C -2.02004017 | 3.69516847  | -0.01422241 |
| C -3.82476578 | -0.82146937 | 0.78271322  | H -1.24836148 | 4.33847660  | 0.42694546  |
| C -4.01138072 | 0.50369121  | 1.17264703  | O -2.59673051 | 4.44812077  | -1.05534339 |
| C -4.15335044 | 1.17251058  | -1.14245948 | H -3.36197956 | 3.94379676  | -1.37091601 |
| H -3.95009325 | -0.42085367 | -2.58075191 | C -1.35299968 | 2.41853901  | -0.52940682 |
| H -3.67720143 | -1.59465901 | 1.52619423  | C -0.26319414 | 0.01639280  | -1.47423421 |
| O -4.28733153 | 2.21529001  | -2.00420806 | C -0.90932031 | 1.43938625  | 0.37086355  |
| O -4.02350786 | 0.93141353  | 2.46241477  | C -1.18337060 | 2.20338073  | -1.88932620 |
| C -4.08568625 | -0.04982250 | 3.47927443  | C -0.63556378 | 1.00699585  | -2.36236313 |
| H -4.19113933 | 0.49518363  | 4.41438093  | C -0.38736355 | 0.24361732  | -0.09290891 |
| H -3.17263535 | -0.65230243 | 3.51129146  | H -1.00751336 | 1.59515031  | 1.43734602  |
| H -4.94822538 | -0.70682232 | 3.33368416  | H -1.49486412 | 2.96916754  | -2.58897969 |
| C -4.26618723 | 1.92411703  | -3.39113115 | H -0.50959267 | 0.82642898  | -3.42374679 |
| H -4.37237614 | 2.88011494  | -3.89944083 | O 0.00529797  | -0.80462262 | 0.68233547  |
| H -5.09962140 | 1.27071228  | -3.66242894 | O 0.20663377  | -1.18128466 | -1.91365515 |
| H -3.31859692 | 1.45766614  | -3.67566261 | H 0.45282387  | -1.71293032 | -1.14022265 |
| O -4.24627852 | 2.82590728  | 0.56556712  | C -0.03070023 | -0.61191004 | 2.08653049  |
| O 2.99109935  | 0.17436131  | 1.79698181  | H 0.34751058  | -1.53157759 | 2.52709689  |
| H 3.01155733  | -0.67998480 | 2.25054274  | H 0.61250844  | 0.22404886  | 2.37162632  |
| C -3.05449686 | 3.44022743  | 1.09457769  | H -1.06028857 | -0.43540457 | 2.41646495  |

**$\beta$ - $\beta'$  bottomC<sub>g</sub>-O**

|              |             |             |               |             |             |
|--------------|-------------|-------------|---------------|-------------|-------------|
| O 2.97673532 | 4.57079532  | -1.88441300 | C 3.60508875  | -2.23665792 | 0.84339622  |
| C 3.66943681 | 4.01242684  | -0.85024796 | C 1.51208427  | -3.86619839 | -0.11327815 |
| C 5.20161680 | 3.13229981  | 1.28448864  | C 3.77605940  | -3.00417471 | -0.32695526 |
| C 4.69292105 | 4.82787819  | -0.34041995 | C 2.42178442  | -2.37687017 | 1.56708634  |
| C 3.42832393 | 2.76225030  | -0.30454082 | C 1.37980940  | -3.14984519 | 1.09380935  |
| C 4.20413763 | 2.31539878  | 0.77019528  | C 2.75660296  | -3.81557897 | -0.79056007 |
| C 5.45250299 | 4.38503122  | 0.72711046  | H 0.46434710  | -3.16831079 | 1.66880075  |
| H 5.79453490 | 2.79609971  | 2.12864483  | H 2.87219412  | -4.37790202 | -1.70816325 |
| H 2.63087758 | 2.13548582  | -0.68507812 | O 4.98072360  | -2.84848685 | -0.92757166 |
| H 6.22415423 | 5.03563854  | 1.11923260  | O 2.25057164  | -1.66908404 | 2.73807783  |
| C 1.81195007 | 3.89052027  | -2.31770436 | C 5.17795272  | -3.44148491 | -2.19973006 |
| H 1.36588540 | 4.51133080  | -3.09164352 | H 6.16566146  | -3.12252432 | -2.52429891 |
| H 1.10899719 | 3.76391052  | -1.48991765 | H 4.42423715  | -3.09042032 | -2.90972702 |
| H 2.06488982 | 2.90942475  | -2.73130214 | H 5.14437999  | -4.53217644 | -2.13079322 |
| O 4.92005926 | 6.04914732  | -0.88154807 | C 3.07313798  | -2.12506376 | 3.81797287  |
| H 4.27626757 | 6.18549021  | -1.58727712 | H 2.83270482  | -1.49664879 | 4.67376219  |
| C 3.96771763 | 0.93533457  | 1.33355186  | H 2.83524740  | -3.16702225 | 4.04549286  |
| H 4.29852265 | 0.91353470  | 2.37937427  | H 4.12915541  | -2.02625026 | 3.56296852  |
| C 4.75802684 | -0.14419440 | 0.58047708  | C 0.40661461  | -4.54394174 | -0.69819902 |
| H 4.35977682 | -0.24649668 | -0.43642041 | C -0.98657592 | -4.17502498 | -0.33416006 |
| C 6.25630217 | 0.10882056  | 0.53577334  | C -1.42408672 | -2.78604441 | -0.91538100 |
| H 6.45118561 | 1.06376237  | 0.04787174  | C -0.60862023 | -2.26775110 | -2.09419953 |
| H 6.62782143 | 0.16748885  | 1.56978862  | O -0.52748651 | -3.12143319 | -3.15788682 |
| O 6.93936755 | -0.88421743 | -0.18923045 | H 0.57366864  | -5.12167435 | -1.60105498 |
| H 6.49165216 | -1.72450936 | -0.03468660 | H -1.08835116 | -4.10757844 | 0.75264530  |
| O 4.59714913 | -1.40694394 | 1.27922381  | H -1.38767081 | -2.02496356 | -0.13005033 |

|               |             |             |               |             |             |
|---------------|-------------|-------------|---------------|-------------|-------------|
| H 0.43601836  | -2.04949913 | -1.79830266 | O 2.57614620  | 0.64819246  | 1.26810148  |
| H -0.98009652 | -1.28077805 | -2.42161315 | H 2.33652800  | 0.01682782  | 1.96309943  |
| C -2.89693766 | -3.04763616 | -1.34451900 | C -4.77519219 | 2.40795973  | 1.18550490  |
| O -3.26956919 | -4.27175310 | -0.74131182 | H -4.36226006 | 1.75206719  | 1.95608569  |
| C -2.11239071 | -5.09021989 | -0.81817148 | C -5.76636569 | 3.35087243  | 1.84214072  |
| H -2.92402635 | -3.17317205 | -2.43684068 | H -5.24102331 | 4.01102543  | 2.53532607  |
| H -1.93550931 | -5.40531138 | -1.85544911 | H -6.24252811 | 3.96316567  | 1.06868697  |
| H -2.27311824 | -5.96595669 | -0.19074296 | O -6.71756100 | 2.62901478  | 2.59381536  |
| C -3.78025367 | -1.90370112 | -0.94484773 | H -7.01217308 | 1.89674812  | 2.04058421  |
| C -5.01394152 | 0.43980917  | -0.12244948 | C -3.66700517 | 3.15030820  | 0.42242440  |
| C -3.92535691 | -0.85278580 | -1.84350143 | H -3.28597159 | 3.92313860  | 1.10071590  |
| C -4.29188850 | -1.82338774 | 0.34685215  | O -4.21688061 | 3.84241591  | -0.67270340 |
| C -4.92194499 | -0.64795030 | 0.75170573  | H -4.67870334 | 3.18419568  | -1.21315840 |
| C -4.54540932 | 0.32376097  | -1.42942623 | C -2.47354554 | 2.27844454  | 0.02258811  |
| H -3.53629905 | -0.95342963 | -2.84814413 | C -0.14621020 | 0.84407167  | -0.64407374 |
| H -4.18454778 | -2.67376927 | 1.00682781  | C -1.90295250 | 1.38012031  | 0.93429447  |
| O -4.71301739 | 1.41932652  | -2.21569980 | C -1.88894785 | 2.41811147  | -1.22769770 |
| O -5.45247076 | -0.43757041 | 1.98323162  | C -0.74040720 | 1.69596809  | -1.55969332 |
| C -5.42520697 | -1.51411384 | 2.90047105  | C -0.76207008 | 0.65975172  | 0.60774836  |
| H -5.92310958 | -1.15436372 | 3.79775122  | H -2.34982191 | 1.24645143  | 1.91062668  |
| H -4.39676827 | -1.80070144 | 3.14184622  | H -2.31960107 | 3.11301098  | -1.93752874 |
| H -5.95956529 | -2.38109374 | 2.50237171  | H -0.26907849 | 1.80808067  | -2.53034938 |
| C -4.17790076 | 1.37109366  | -3.52701676 | O -0.15328517 | -0.24645745 | 1.42492897  |
| H -4.37049952 | 2.34824415  | -3.96518543 | O 0.99918132  | 0.18229392  | -0.96352881 |
| H -4.67571120 | 0.59972283  | -4.12069045 | H 1.54993034  | 0.10621743  | -0.15919315 |
| H -3.10024808 | 1.18468846  | -3.49912114 | C -0.81302382 | -0.57352287 | 2.63182558  |
| O -5.57642937 | 1.61780982  | 0.28667938  | H -0.19962685 | -1.33427737 | 3.10886969  |

H -0.88544903 0.29649906 3.29150389

H -1.81777014 -0.96232210 2.42667573

**$\beta$ - $\beta'$  bottom  $C_{\beta}$ - $C_{\gamma}$**

O 2.08987724 4.49212483 -0.97073575

H 5.70647341 -1.75253336 -1.58098619

C 3.18893782 3.91052192 -0.41014502

O 4.68255582 -1.59337876 0.61006187

C 5.56515001 2.99957754 0.68992617

C 3.51558017 -2.29820220 0.52276937

C 4.32571807 4.73799841 -0.40958860

C 1.08735606 -3.67900114 0.36438164

C 3.24988493 2.63429085 0.12636931

C 3.04231767 -2.76740875 -0.71489518

C 4.45220548 2.17195097 0.67715979

C 2.80052841 -2.62094981 1.67228051

C 5.50690119 4.28089438 0.14264825

C 1.59290370 -3.30757584 1.60094716

H 6.49323694 2.64820649 1.12818115

C 1.82957652 -3.44501471 -0.79298221

H 2.37829758 1.98852600 0.14371933

H 1.04332538 -3.49229659 2.51797255

H 6.36656233 4.93930225 0.14698301

H 1.44374147 -3.78776368 -1.74382013

C 0.85988670 3.79767960 -0.86178252

O 3.83268141 -2.48968446 -1.77677980

H 0.10457241 4.42950538 -1.32480718

O 3.24487445 -2.16985894 2.89400621

H 0.61098669 3.62821404 0.18982500

C 3.30354964 -2.68345209 -3.08174222

H 0.89823344 2.83692213 -1.38316097

H 4.05124916 -2.28082852 -3.76128891

O 4.25396525 5.98392178 -0.93839954

H 2.36271186 -2.13843306 -3.19591629

H 3.35195096 6.11918091 -1.25356876

H 3.15260411 -3.74704563 -3.28401301

C 4.52574529 0.76113139 1.20809541

C 4.39490934 -2.86502248 3.38904705

H 5.40466330 0.67230042 1.86182836

H 4.63892679 -2.41114725 4.34752708

C 4.69524912 -0.24784316 0.05961576

H 4.15361626 -3.92134272 3.52962841

H 3.86283952 -0.14544842 -0.64543519

H 5.23102759 -2.75709567 2.69613249

C 6.03139829 -0.08982579 -0.64827244

C -0.34514110 -4.17646886 0.25679261

H 6.13490012 0.93846974 -0.99618926

C -1.26097510 -2.99335871 0.19253420

H 6.82550665 -0.28693766 0.08686346

C -2.05115483 -3.01065831 -1.06660972

O 6.16927325 -0.92825236 -1.76948747

C -1.37867530 -4.15740128 -1.84552059



|               |             |             |               |             |             |
|---------------|-------------|-------------|---------------|-------------|-------------|
| O -0.58580115 | -4.90972379 | -0.93213958 | H -4.99524446 | 2.02804875  | -3.93750665 |
| H -0.57123487 | -4.83129655 | 1.10910775  | H -5.57403802 | 0.37189960  | -3.62657678 |
| H -1.34227722 | -2.25329466 | 0.97389515  | H -3.81757671 | 0.72130031  | -3.63961101 |
| H -1.92508037 | -2.07777662 | -1.62794113 | O -4.88204775 | 2.20801306  | 0.52802860  |
| H -0.73427168 | -3.73463143 | -2.62487485 | O 3.34559040  | 0.49769796  | 1.93843363  |
| H -2.08956431 | -4.84003430 | -2.31532889 | H 3.43975115  | -0.35303645 | 2.38958841  |
| C -3.58098667 | -3.12187781 | -0.78802196 | C -3.76825248 | 2.96405663  | 1.04070335  |
| O -3.87349991 | -4.01791414 | 0.27090769  | H -3.25070338 | 2.36307630  | 1.79234699  |
| C -3.64259757 | -5.32844220 | 0.02065699  | C -4.40576669 | 4.15784592  | 1.72652858  |
| H -4.08835612 | -3.46768009 | -1.69983345 | H -3.62611078 | 4.80537726  | 2.13303891  |
| H -3.80060786 | -5.68600229 | -0.99214196 | H -4.98331687 | 4.72692001  | 0.98971200  |
| H -3.84588453 | -5.96872201 | 0.86624314  | O -5.20864667 | 3.74263141  | 2.80927266  |
| C -4.08678814 | -1.75211578 | -0.40489162 | H -5.74579482 | 3.00761784  | 2.49315713  |
| C -4.63862561 | 0.89420459  | 0.23419478  | C -2.81872988 | 3.36892668  | -0.09945732 |
| C -4.34471565 | -0.83790213 | -1.42205234 | H -2.16023779 | 4.14985352  | 0.30199016  |
| C -4.15252762 | -1.37283482 | 0.93119996  | O -3.54199262 | 3.97305894  | -1.14336715 |
| C -4.44068069 | -0.04479994 | 1.24838964  | H -4.24060448 | 3.35099909  | -1.39592800 |
| C -4.62495673 | 0.48682209  | -1.10029548 | C -1.93679165 | 2.21995622  | -0.58539678 |
| H -4.29172492 | -1.15791387 | -2.45481360 | C -0.29590810 | 0.12113746  | -1.45486021 |
| H -3.97516517 | -2.11317317 | 1.69806106  | C -1.18990540 | 1.47477074  | 0.33871320  |
| O -4.86747437 | 1.46496107  | -2.01216810 | C -1.82015438 | 1.92595915  | -1.93521823 |
| O -4.52344751 | 0.44633688  | 2.51030075  | C -1.01523170 | 0.86895866  | -2.36838996 |
| C -4.34937136 | -0.46090819 | 3.58218790  | C -0.36466305 | 0.44555710  | -0.08687644 |
| H -4.47227924 | 0.12430962  | 4.49035624  | H -1.23447802 | 1.71929016  | 1.39298471  |
| H -3.34920206 | -0.90490432 | 3.56373880  | H -2.35951788 | 2.52773683  | -2.65537079 |
| H -5.10052941 | -1.25484720 | 3.54923739  | H -0.92195083 | 0.62656085  | -3.42093961 |
| C -4.80679150 | 1.11164387  | -3.38220254 | O 0.43236399  | -0.31497787 | 0.71006992  |

|              |             |             |               |             |            |
|--------------|-------------|-------------|---------------|-------------|------------|
| O 0.48855532 | -0.90730609 | -1.86807774 | H 1.06382580  | -0.77315405 | 2.56781662 |
| H 0.87759056 | -1.33127826 | -1.08676568 | H 0.77067208  | 0.95695353  | 2.31163140 |
| C 0.40031903 | -0.04957439 | 2.10209235  | H -0.61848891 | -0.17262417 | 2.48764630 |

**$\beta$ - $\beta'$  bottom $C_{\gamma}$ -O**

|              |            |             |              |             |             |
|--------------|------------|-------------|--------------|-------------|-------------|
| O 1.89267601 | 4.58667327 | -1.13584084 | H 6.54500328 | 0.25872612  | 0.70980680  |
| C 2.78954945 | 4.09432867 | -0.23600256 | O 6.26005187 | -0.19663676 | -1.29080274 |
| C 4.73433924 | 3.36938837 | 1.60415693  | H 5.85489350 | -1.07101129 | -1.28135428 |
| C 3.68160075 | 5.06132646 | 0.26247169  | O 4.50329996 | -1.27793831 | 0.73811969  |
| C 2.87434988 | 2.77920295 | 0.18903121  | C 3.45951005 | -2.08769941 | 0.40072443  |
| C 3.86148085 | 2.41105922 | 1.11340375  | C 1.33877082 | -3.81252871 | -0.24688030 |
| C 4.64652050 | 4.69624182 | 1.18089743  | C 3.21553093 | -2.44545747 | -0.93783941 |
| H 5.49585610 | 3.08703790 | 2.32274990  | C 2.65472151 | -2.63925517 | 1.38985476  |
| H 2.17722007 | 2.03080053 | -0.17246542 | C 1.60694030 | -3.50370679 | 1.07820571  |
| H 5.32019116 | 5.45689833 | 1.55521114  | C 2.15335004 | -3.28313832 | -1.25444637 |
| C 1.02054313 | 3.65692401 | -1.75714153 | H 1.00919315 | -3.88081169 | 1.89873037  |
| H 0.39140064 | 4.23004839 | -2.43435465 | H 1.92703503 | -3.52461134 | -2.28494801 |
| H 0.39580020 | 3.15369391 | -1.01575171 | O 4.07025447 | -1.91173991 | -1.83972789 |
| H 1.58886399 | 2.91093765 | -2.32073056 | O 2.84300692 | -2.26059644 | 2.69934748  |
| O 3.58831834 | 6.34562972 | -0.15966998 | C 3.78411131 | -2.07407218 | -3.22350702 |
| H 2.86890956 | 6.39507827 | -0.80089826 | H 4.54796504 | -1.50250530 | -3.74567954 |
| C 3.98563018 | 0.96354094 | 1.51469257  | H 2.79364543 | -1.67640166 | -3.45693750 |
| H 4.74054006 | 0.87717710 | 2.30828770  | H 3.84852317 | -3.12716948 | -3.50945925 |
| C 4.45414085 | 0.11337514 | 0.32560917  | C 3.98366822 | -2.86079162 | 3.32257381  |
| H 3.74482099 | 0.21192479 | -0.50272924 | H 4.01662421 | -2.47527677 | 4.33967447  |
| C 5.85975230 | 0.47759685 | -0.12188765 | H 3.86428509 | -3.94688276 | 3.34193415  |
| H 5.90502214 | 1.54779839 | -0.32903804 | H 4.89495245 | -2.59024856 | 2.78650779  |

|               |             |             |               |             |             |
|---------------|-------------|-------------|---------------|-------------|-------------|
| C 0.20242669  | -4.72499355 | -0.69179804 | H -4.30829352 | 1.10830760  | 4.62509554  |
| C -0.96923161 | -4.86640648 | 0.28689540  | H -3.06830968 | 0.00000288  | 3.98326411  |
| C -1.65849863 | -3.49656269 | 0.04052097  | H -4.76318155 | -0.54606755 | 4.13544016  |
| C -1.45210680 | -3.29791391 | -1.47558149 | C -4.39373454 | -0.06315580 | -3.21933355 |
| O -0.41524685 | -4.20035013 | -1.86339632 | H -4.59070549 | 0.67352615  | -3.99537247 |
| H 0.61188089  | -5.69999321 | -0.96885815 | H -5.03898728 | -0.93292721 | -3.37115926 |
| H -0.66191142 | -4.95141575 | 1.32964603  | H -3.34125781 | -0.35979698 | -3.25431920 |
| H -1.12144203 | -2.72111207 | 0.59294685  | O -4.90737449 | 1.95020009  | 0.27228728  |
| H -1.17118414 | -2.26853273 | -1.71375570 | O 2.73003318  | 0.51420734  | 1.98552488  |
| H -2.34160652 | -3.56888972 | -2.05060494 | H 2.83971343  | -0.36740019 | 2.36962656  |
| C -3.15349196 | -3.43098330 | 0.48485972  | C -3.88399306 | 2.93402559  | 0.52561118  |
| O -3.15332732 | -3.96434400 | 1.74237954  | H -3.25317380 | 2.59160799  | 1.34930355  |
| C -1.82379938 | -6.02974260 | -0.08703345 | C -4.64336511 | 4.16103071  | 0.99568757  |
| H -3.71513584 | -4.08608083 | -0.19999379 | H -3.94327210 | 4.98093216  | 1.16898076  |
| H -1.83134602 | -6.38914958 | -1.10802864 | H -5.35036633 | 4.46303372  | 0.21561571  |
| H -2.52133383 | -6.44364208 | 0.62667731  | O -5.29633469 | 3.90405491  | 2.21955521  |
| C -3.67003928 | -2.00201881 | 0.42989198  | H -5.70988512 | 3.03673750  | 2.14135215  |
| C -4.51200334 | 0.64377342  | 0.32944040  | C -3.07057878 | 3.19103343  | -0.74721181 |
| C -3.98181724 | -1.42553309 | -0.79882546 | H -2.50050334 | 4.11326318  | -0.57854243 |
| C -3.80265936 | -1.28156217 | 1.61187657  | O -3.94214965 | 3.47543813  | -1.81898006 |
| C -4.23842027 | 0.04223747  | 1.55858602  | H -4.52156628 | 2.70429607  | -1.90745416 |
| C -4.39766154 | -0.09553030 | -0.84822856 | C -2.06879019 | 2.09313736  | -1.11471538 |
| H -3.89976316 | -2.00658137 | -1.70733276 | C -0.13411256 | 0.21453343  | -1.88396704 |
| H -3.57886328 | -1.76722103 | 2.55121297  | C -1.42546736 | 1.30448585  | -0.15060080 |
| O -4.69053853 | 0.57656142  | -1.98930349 | C -1.72981072 | 1.92441273  | -2.45236039 |
| O -4.40523216 | 0.84625163  | 2.63775008  | C -0.76301174 | 0.99482962  | -2.83701136 |
| C -4.11628098 | 0.30742007  | 3.91527761  | C -0.48338534 | 0.35824870  | -0.53097731 |

|               |             |             |               |             |             |
|---------------|-------------|-------------|---------------|-------------|-------------|
| H -1.66343267 | 1.41004440  | 0.89885619  | H 1.08850314  | -1.17798268 | -1.45329159 |
| H -2.22414431 | 2.53272824  | -3.19957379 | C -0.08465643 | -0.37631778 | 1.69365707  |
| H -0.48531408 | 0.86742997  | -3.87697898 | H 0.51847154  | -1.14088453 | 2.17943038  |
| O 0.16674094  | -0.50079120 | 0.30118599  | H 0.23047405  | 0.60598820  | 2.05142733  |
| O 0.80972287  | -0.69211722 | -2.24511053 | H -1.14614055 | -0.55013951 | 1.89982918  |

**$\beta$ - $\beta'$  bottomC $_{\alpha}$ -C $_{\beta}$   $\alpha$ -side**

|               |             |             |               |             |             |
|---------------|-------------|-------------|---------------|-------------|-------------|
| C -4.49685634 | -0.10323774 | 1.03071694  | C 1.01611826  | 1.85345871  | -0.47688519 |
| C -3.31366151 | 0.62284631  | 0.49177564  | C 1.10469577  | -0.13654012 | -1.84163151 |
| C -3.13139514 | -0.06004669 | -0.87495443 | H -0.76949654 | -0.75271786 | -2.71140691 |
| C -4.57874700 | -0.41154167 | -1.23547082 | H -0.92706496 | 2.80505396  | -0.35166655 |
| O -5.27749694 | -0.56105597 | 0.01149590  | O 1.90251820  | -1.11543981 | -2.34153185 |
| H -5.03438327 | 0.12396862  | 1.94208371  | O 1.73547103  | 2.71226205  | 0.29155647  |
| H -2.43056254 | 0.52929651  | 1.11979610  | C 1.07511573  | 3.85944754  | 0.78934751  |
| H -2.51043311 | -0.95254328 | -0.80631291 | H 1.82698378  | 4.42225437  | 1.33751674  |
| H -4.67410563 | -1.34511025 | -1.78863326 | H 0.25917420  | 3.58424544  | 1.46547569  |
| H -5.05741515 | 0.39746449  | -1.79675424 | H 0.67896386  | 4.46940541  | -0.02732258 |
| C -2.48802428 | 1.04400192  | -1.71676060 | C 1.29655796  | -2.09750403 | -3.16294882 |
| O -3.07794869 | 2.24957566  | -1.25740634 | H 2.08737618  | -2.79567232 | -3.42916495 |
| C -3.55074399 | 2.09889573  | 0.08243109  | H 0.88768881  | -1.64457082 | -4.07037357 |
| H -2.72612644 | 0.95283138  | -2.78100020 | H 0.50678648  | -2.62459681 | -2.62007409 |
| H -4.61363269 | 2.35511075  | 0.09881854  | O 3.07315437  | 0.63588874  | -0.73745011 |
| H -3.01442743 | 2.79006752  | 0.73984721  | C 3.41835191  | 0.21282259  | 0.59599410  |
| C -0.98183997 | 1.02075713  | -1.52469251 | H 2.82102068  | 0.78437343  | 1.31058293  |
| C 1.73869344  | 0.78229792  | -1.00164583 | C 4.87263024  | 0.61527506  | 0.75376465  |
| C -0.25863325 | -0.02427098 | -2.09416565 | H 5.23222504  | 0.31014041  | 1.73861668  |
| C -0.35147206 | 1.97430079  | -0.73515408 | H 5.46942592  | 0.10456408  | -0.00962430 |

|               |             |             |               |             |             |
|---------------|-------------|-------------|---------------|-------------|-------------|
| O 5.01451171  | 2.01698397  | 0.67393143  | C -0.46075613 | -1.31458533 | 1.85956157  |
| H 4.49642192  | 2.30616841  | -0.08555204 | H 1.27493125  | -0.17674989 | 2.36322603  |
| C 3.19789629  | -1.30013367 | 0.76010643  | H 1.85227937  | -3.31419686 | -0.48640054 |
| H 3.70922372  | -1.59756999 | 1.68316721  | H -0.57780967 | -3.88245158 | -0.33068938 |
| O 3.84474323  | -1.99449540 | -0.27929460 | O -1.35943246 | -0.71038938 | 2.69540685  |
| H 3.49579797  | -1.63772321 | -1.10959708 | O -2.31908241 | -2.65362527 | 1.13037599  |
| C 1.72424076  | -1.68523910 | 0.88803587  | H -2.78092440 | -2.00895027 | 1.68601886  |
| C -0.99896056 | -2.34685786 | 1.07420889  | C -0.95296740 | 0.48539751  | 3.32980436  |
| C 0.88077518  | -0.98402969 | 1.75884617  | H -1.82925927 | 0.86896645  | 3.84869174  |
| C 1.19876466  | -2.74380386 | 0.16123532  | H -0.15569985 | 0.29758758  | 4.05427198  |
| C -0.15645475 | -3.06541733 | 0.24382628  | H -0.60842959 | 1.21595896  | 2.58771693  |

**$\beta$ - $\beta'$  bottom C<sub>g</sub>-C<sub>ph</sub> phenyl-side**

|               |             |             |               |             |             |
|---------------|-------------|-------------|---------------|-------------|-------------|
| O -4.32165487 | 1.16064687  | -1.65963931 | O -5.93799512 | 0.21850723  | 0.20079909  |
| C -3.74380788 | 0.32665196  | -0.74468529 | H -6.06156722 | 0.81009017  | -0.55110937 |
| C -2.83923744 | -1.41211676 | 1.21583405  | C -0.48722472 | -1.28724976 | 0.29428379  |
| C -4.63515242 | -0.15655656 | 0.22777215  | H -0.35471884 | -2.20133598 | 0.88967027  |
| C -2.41257322 | -0.05226082 | -0.72528833 | C 0.33865460  | -0.17541018 | 0.96040274  |
| C -1.95295973 | -0.92673977 | 0.26588420  | H 0.24294466  | 0.74895494  | 0.38061248  |
| C -4.17920792 | -1.02522299 | 1.20167299  | C -0.04961483 | 0.05815412  | 2.41178144  |
| H -2.49019220 | -2.09969706 | 1.97889806  | H -1.10963949 | 0.30665257  | 2.46814237  |
| H -1.71819472 | 0.28836921  | -1.48267816 | H 0.11465667  | -0.87928416 | 2.96334872  |
| H -4.88451509 | -1.39754689 | 1.93414777  | O 0.66272777  | 1.11826219  | 3.00369819  |
| C -3.49548031 | 1.66868423  | -2.68919711 | H 1.55293386  | 1.11413372  | 2.63454286  |
| H -4.13330591 | 2.29110802  | -3.31234133 | O 1.73287090  | -0.57602092 | 0.98239100  |
| H -3.07538819 | 0.85517471  | -3.28709024 | C 2.56018604  | -0.11142471 | -0.00177498 |
| H -2.68455766 | 2.27349032  | -2.27321841 | C 4.29165222  | 0.76647484  | -1.90613749 |

|              |             |             |               |             |             |
|--------------|-------------|-------------|---------------|-------------|-------------|
| C 2.96515384 | 1.23552350  | -0.01641005 | H 2.15868906  | 3.80129812  | 1.80466281  |
| C 3.07856564 | -0.99581302 | -0.94616392 | H 2.36594101  | 3.84058153  | 0.03329141  |
| C 3.96840686 | -0.56173434 | -1.93403465 | H 3.78278174  | 3.58424174  | 1.09673247  |
| C 3.84261861 | 1.69870636  | -1.00064949 | C 3.24582608  | -3.09267064 | 0.10734238  |
| H 4.34225525 | -1.26376176 | -2.66870516 | H 2.83930397  | -4.09592652 | -0.00373614 |
| H 4.16181496 | 2.73187910  | -1.03784770 | H 4.33196352  | -3.11888241 | -0.01062877 |
| O 2.45073144 | 1.99720800  | 0.97750013  | H 2.98123779  | -2.68320760 | 1.08368626  |
| O 2.66606000 | -2.30523824 | -0.93766968 | O -0.05637437 | -1.49404461 | -1.03422470 |
| C 2.71483196 | 3.38904104  | 0.96594852  | H 0.80280641  | -1.93711501 | -1.02270363 |

**$\beta$ -O-4 bottomC <sub>$\alpha$</sub> -C <sub>$\beta$</sub>   $\alpha$ -side**

|               |             |             |               |             |             |
|---------------|-------------|-------------|---------------|-------------|-------------|
| O 1.90198698  | 1.20309115  | 0.00000027  | C 1.55157344  | 2.57276574  | -0.00000093 |
| C 0.88335472  | 0.29187159  | 0.00000110  | H 2.48734180  | 3.12685367  | -0.00000449 |
| C -0.96110262 | -1.79049985 | 0.00000142  | H 0.97354800  | 2.82568092  | 0.89332547  |
| C 1.32554171  | -1.04529116 | 0.00000028  | H 0.97354281  | 2.82567786  | -0.89332468 |
| C -0.46107417 | 0.59495851  | 0.00000173  | O 2.65306222  | -1.32593686 | -0.00000108 |
| C -1.42091992 | -0.45319713 | 0.00000013  | H 3.13229317  | -0.48871758 | -0.00000852 |
| C 0.39241962  | -2.07444482 | 0.00000038  | C -2.79530303 | -0.17230189 | -0.00000330 |
| H -1.68110577 | -2.60072230 | 0.00000172  | H -3.54970455 | -0.94804944 | -0.00000329 |
| H -0.80885632 | 1.61849128  | 0.00000150  | O -3.20561013 | 1.12580232  | 0.00000806  |
| H 0.75397751  | -3.09540035 | -0.00000033 | H -4.16348763 | 1.16936704  | -0.00005023 |

**$\beta$ -O-4 bottomC <sub>$\alpha$</sub> -C <sub>$\beta$</sub>   $\beta$ -side**

|               |             |            |               |             |             |
|---------------|-------------|------------|---------------|-------------|-------------|
| C -3.70358450 | -2.89712055 | 0.78342462 | O -4.52365423 | -4.02030722 | -1.17905751 |
| H -2.71961815 | -2.49508112 | 0.55769515 | H -4.90309282 | -3.13960023 | -1.28784554 |
| C -4.20194007 | -4.16787068 | 0.20205799 | O -4.70300293 | -1.96367088 | 0.95531617  |
| H -3.43353604 | -4.93827719 | 0.27094688 | C -4.31906442 | -0.65808439 | 0.75757413  |
| H -5.08493069 | -4.49997888 | 0.76141275 | C -3.32966446 | 1.88771830  | 0.22503587  |

|               |             |             |               |             |             |
|---------------|-------------|-------------|---------------|-------------|-------------|
| C -4.31238440 | -0.16583284 | -0.55608584 | O 0.84427302  | 4.30646501  | 0.23446140  |
| C -3.89568802 | 0.15132253  | 1.80867732  | C -0.52199366 | 4.55969051  | 0.51388501  |
| C -3.40800174 | 1.42936594  | 1.53001944  | H 1.10141325  | 3.80546449  | -1.74886287 |
| C -3.81817882 | 1.10808058  | -0.82519983 | H -0.94901814 | 5.25148172  | -0.22497840 |
| H -3.06196257 | 2.02881385  | 2.36500889  | H -0.58325166 | 5.01026624  | 1.50469218  |
| H -3.78990109 | 1.50121510  | -1.83151943 | C 2.05312275  | 2.35409829  | -0.49820942 |
| O -4.75486256 | -1.03318123 | -1.49755503 | C 3.92517578  | 0.36476570  | 0.00828536  |
| O -3.83204700 | -0.24971340 | 3.10167193  | C 2.58054309  | 1.61983840  | -1.55701416 |
| C -4.60646628 | -0.66123224 | -2.86257580 | C 2.47652201  | 2.13289304  | 0.80710184  |
| H -4.96166476 | -1.51211611 | -3.43953048 | C 3.42334659  | 1.13814846  | 1.05587722  |
| H -3.55567476 | -0.47250436 | -3.09403804 | C 3.52337397  | 0.62636827  | -1.30303107 |
| H -5.21532176 | 0.21722467  | -3.09074982 | H 2.23800411  | 1.81556659  | -2.56528012 |
| C -4.79564409 | -1.17760958 | 3.60211765  | H 2.07483522  | 2.74925485  | 1.59914394  |
| H -4.83566965 | -1.00454430 | 4.67603177  | O 4.09868283  | -0.15299383 | -2.25465892 |
| H -5.77514209 | -0.99260202 | 3.15783899  | O 3.90738115  | 0.82170445  | 2.28515818  |
| H -4.49309649 | -2.20519701 | 3.39959344  | C 3.48996969  | 1.61482650  | 3.37975376  |
| C -2.65070828 | 3.21833018  | -0.06127317 | H 4.01549769  | 1.22448358  | 4.24807578  |
| C -1.19309914 | 3.19275748  | 0.40621555  | H 2.41011424  | 1.53267454  | 3.53853113  |
| C -0.44824748 | 2.58838286  | -0.79599479 | H 3.75551020  | 2.66441758  | 3.22639775  |
| C -1.38242471 | 2.90124461  | -1.98160965 | C 3.67296157  | 0.02679632  | -3.59376025 |
| O -2.56828039 | 3.49958591  | -1.44615622 | H 4.21962318  | -0.70670431 | -4.18281456 |
| H -3.22021624 | 4.03355321  | 0.39533021  | H 3.91689899  | 1.03290338  | -3.94600132 |
| H -1.04413308 | 2.61132077  | 1.31652827  | H 2.59814812  | -0.15372994 | -3.68621815 |
| H -0.30776877 | 1.51351445  | -0.69257924 | O 4.83129345  | -0.63234680 | 0.24651773  |
| H -1.63586299 | 1.98492487  | -2.52310728 | C 4.31790942  | -1.82168893 | 0.87813934  |
| H -0.95104132 | 3.61809656  | -2.68364705 | H 3.65196660  | -1.52955490 | 1.69352687  |
| C 0.92392745  | 3.31575493  | -0.78302199 | C 5.54146298  | -2.48616429 | 1.48091482  |

|               |             |             |               |             |             |
|---------------|-------------|-------------|---------------|-------------|-------------|
| H 5.25178850  | -3.42493525 | 1.95758381  | C 0.61035591  | -1.74492113 | -2.32345218 |
| H 6.25856287  | -2.70593121 | 0.68288872  | C 0.12596703  | -1.10908933 | -0.05568809 |
| O 6.10996937  | -1.66826726 | 2.48078896  | H 1.62048927  | -1.55739038 | 1.39922461  |
| H 6.14112854  | -0.77331812 | 2.12412456  | H 2.51065639  | -2.70652112 | -2.62714084 |
| C 3.60032226  | -2.71098645 | -0.14818931 | H 0.29947468  | -1.79995782 | -3.36025322 |
| H 3.45263068  | -3.68895438 | 0.32468261  | O -0.80713711 | -0.52770840 | 0.75858357  |
| O 4.44591695  | -2.94178054 | -1.25093731 | O -1.43299232 | -0.63422842 | -1.80847142 |
| H 4.67826374  | -2.07021556 | -1.60461242 | H -1.89048410 | -0.27170012 | -1.03444851 |
| C 2.23218373  | -2.17720463 | -0.57753121 | C -0.45202009 | -0.34105556 | 2.11722667  |
| C -0.24386379 | -1.15872765 | -1.40875753 | H -1.29951242 | 0.14689577  | 2.59227084  |
| C 1.34826848  | -1.61645722 | 0.35382255  | H -0.27151821 | -1.30254240 | 2.60679737  |
| C 1.84086736  | -2.25399100 | -1.90705675 | H 0.44325321  | 0.28674661  | 2.18993968  |

**$\beta$ -O-4 bottomC <sub>$\alpha$</sub> -C<sub>Ph</sub>  $\alpha$ -side**

|               |             |             |               |             |             |
|---------------|-------------|-------------|---------------|-------------|-------------|
| C -2.87734173 | -3.39758106 | 1.27265367  | C -3.71673753 | 0.28230614  | 1.66200986  |
| H -2.36856147 | -4.33217245 | 1.07160006  | C -3.21337330 | 1.56957249  | 1.53799078  |
| C -3.63739775 | -2.75514579 | 0.15998592  | C -3.62832871 | 1.48786964  | -0.83155129 |
| H -2.97347490 | -2.25727325 | -0.56488431 | H -2.85115952 | 2.06989642  | 2.42960078  |
| C -4.49469660 | -3.79057050 | -0.55119994 | H -3.59327328 | 1.97642124  | -1.79555001 |
| H -3.87484800 | -4.65575824 | -0.79799081 | O -4.65165488 | -0.52394448 | -1.72531198 |
| H -5.27209144 | -4.11548440 | 0.15200680  | O -3.68090392 | -0.33436078 | 2.89121666  |
| O -5.05297384 | -3.31703149 | -1.75086311 | C -4.42847296 | -0.06262625 | -3.05267062 |
| H -5.31061062 | -2.39853724 | -1.60745299 | H -4.79754873 | -0.85367632 | -3.70162996 |
| O -4.54536949 | -1.73669101 | 0.68410221  | H -3.36043242 | 0.08878833  | -3.22501970 |
| C -4.14131659 | -0.43962418 | 0.54806106  | H -4.98463602 | 0.85945609  | -3.23930329 |
| C -3.11492504 | 2.15284090  | 0.28034699  | C -4.97087438 | -0.57820900 | 3.46997297  |
| C -4.15473453 | 0.20310286  | -0.69937667 | H -4.78812134 | -1.06573056 | 4.42526047  |



|               |             |             |               |             |             |
|---------------|-------------|-------------|---------------|-------------|-------------|
| H -5.48445323 | 0.37268172  | 3.62826655  | O 4.12016088  | 0.63675210  | 2.25894287  |
| H -5.56019241 | -1.22766374 | 2.82147352  | C 3.75734874  | 1.38540343  | 3.40315778  |
| C -2.37254485 | 3.46916003  | 0.11134321  | H 4.28014673  | 0.92512582  | 4.23822685  |
| C -0.91792985 | 3.32842369  | 0.57019488  | H 2.67786041  | 1.34082676  | 3.57835207  |
| C -0.20499422 | 2.78651977  | -0.68021052 | H 4.06635657  | 2.42946017  | 3.30209911  |
| C -1.11976069 | 3.24714102  | -1.83218390 | C 3.71265921  | 0.14571700  | -3.64270251 |
| O -2.27313641 | 3.86134145  | -1.24508583 | H 4.21043838  | -0.58196093 | -4.28030336 |
| H -2.90007833 | 4.27075155  | 0.63736235  | H 3.99434021  | 1.15584920  | -3.95304018 |
| H -0.79847348 | 2.66684091  | 1.42884855  | H 2.62881461  | 0.01811176  | -3.71522194 |
| H -0.12190893 | 1.70127037  | -0.66659619 | O 4.92770768  | -0.75425657 | 0.12961890  |
| H -1.42146406 | 2.39349625  | -2.44699924 | O -2.26535079 | -2.65243573 | 2.22040793  |
| H -0.65066124 | 3.99565057  | -2.47425516 | H -2.80055092 | -1.87313796 | 2.45028679  |
| C 1.20452196  | 3.43352487  | -0.61110196 | C 4.37580315  | -1.94830808 | 0.71976662  |
| O 1.17384682  | 4.34909313  | 0.47734058  | H 3.73883801  | -1.66499802 | 1.56073953  |
| C -0.17712251 | 4.64608125  | 0.78536249  | C 5.58088896  | -2.68974540 | 1.26753332  |
| H 1.41406866  | 3.98369736  | -1.53716768 | H 5.25977459  | -3.63558101 | 1.70874284  |
| H -0.57050923 | 5.41731312  | 0.10917312  | H 6.27270349  | -2.90404241 | 0.44605517  |
| H -0.21319182 | 5.01586591  | 1.81034364  | O 6.20312150  | -1.94164559 | 2.28989926  |
| C 2.28032617  | 2.39358522  | -0.39823828 | H 6.26144265  | -1.03287677 | 1.97385082  |
| C 4.06421561  | 0.29376202  | -0.03673279 | C 3.60272412  | -2.75970208 | -0.33021575 |
| C 2.74487528  | 1.68619971  | -1.50448627 | H 3.41821927  | -3.74981884 | 0.10256142  |
| C 2.72172335  | 2.08708834  | 0.88314881  | O 4.42104459  | -2.97898612 | -1.45641014 |
| C 3.62421032  | 1.03650278  | 1.05914568  | H 4.68415424  | -2.10327171 | -1.77649875 |
| C 3.64480945  | 0.63854418  | -1.32344644 | C 2.25535036  | -2.14579248 | -0.71581682 |
| H 2.39005533  | 1.94819008  | -2.49342081 | C -0.16763084 | -0.96406272 | -1.47292435 |
| H 2.36931940  | 2.68169643  | 1.71417126  | C 1.42086710  | -1.56341345 | 0.24731205  |
| O 4.16152603  | -0.11806856 | -2.32549223 | C 1.83887592  | -2.16376338 | -2.03980448 |

|               |             |             |               |             |             |
|---------------|-------------|-------------|---------------|-------------|-------------|
| C 0.63179160  | -1.57523126 | -2.41926574 | O -1.33241003 | -0.35742283 | -1.83382716 |
| C 0.22602795  | -0.97026335 | -0.12566139 | H -1.74310449 | 0.01006650  | -1.03671183 |
| H 1.71156870  | -1.55161678 | 1.28904140  | C -0.27718241 | -0.25894726 | 2.08124130  |
| H 2.47108129  | -2.63003059 | -2.78460899 | H -1.09215075 | 0.25560626  | 2.58675106  |
| H 0.30066167  | -1.58291226 | -3.45130350 | H -0.16580722 | -1.25722956 | 2.51002927  |
| O -0.64747654 | -0.34207623 | 0.71548863  | H 0.65247845  | 0.31241728  | 2.18307650  |

**$\beta$ -O-4 bottomC <sub>$\alpha$</sub> -C<sub>Ph</sub> phenyl-side**

|               |             |             |               |             |             |
|---------------|-------------|-------------|---------------|-------------|-------------|
| O -1.70204643 | 0.39151922  | 0.00005131  | H -0.81442357 | -2.22683702 | -0.00025417 |
| C -0.42685787 | -0.09391925 | -0.00007434 | H 2.64251093  | 1.35038315  | 0.00000482  |
| C 2.28585693  | -0.79248833 | 0.00008171  | C -2.75833160 | -0.54885512 | 0.00006585  |
| C 0.56516567  | 0.90282983  | -0.00003496 | H -3.68028655 | 0.02748828  | 0.00001058  |
| C -0.07043026 | -1.44051089 | -0.00012617 | H -2.71814988 | -1.17721824 | 0.89443145  |
| C 1.27967787  | -1.71938930 | 0.00002234  | H -2.71812830 | -1.17732283 | -0.89423269 |
| C 1.90522306  | 0.55645076  | -0.00000111 | O 0.20602457  | 2.21240869  | -0.00002101 |
| H 3.33205158  | -1.07151376 | 0.00023157  | H -0.75722212 | 2.25889099  | -0.00003385 |

**$\beta$ -O-4 bottomC <sub>$\beta$</sub> -O $\beta$ -side**

|               |             |             |               |             |             |
|---------------|-------------|-------------|---------------|-------------|-------------|
| O 2.96719965  | 0.78764196  | -0.63221133 | C 2.86672899  | 2.18219636  | -0.84722794 |
| C 1.87015938  | 0.14746969  | -0.13046507 | H 3.83122961  | 2.50060929  | -1.23547292 |
| C -0.18835284 | -1.39215193 | 0.90730844  | H 2.65525995  | 2.70506994  | 0.08960741  |
| C 2.05738075  | -1.23101615 | 0.06614620  | H 2.08391084  | 2.40687462  | -1.57722866 |
| C 0.66060921  | 0.74458681  | 0.18193212  | O 3.24586121  | -1.80592491 | -0.24141450 |
| C -0.37760960 | -0.03192920 | 0.70682277  | H 3.83167205  | -1.11713342 | -0.57768506 |
| C 1.02731280  | -1.99371779 | 0.58488626  | C -1.73123187 | 0.60019049  | 0.97491194  |
| H -0.98824580 | -1.99451551 | 1.32561082  | H -2.21093759 | 0.03582602  | 1.78734191  |
| H 0.50364659  | 1.80698178  | 0.05124943  | C -2.57779515 | 0.51406040  | -0.25513077 |
| H 1.19514063  | -3.05203407 | 0.74109957  | H -2.37971675 | 1.23618257  | -1.04377761 |

|               |             |             |               |            |             |
|---------------|-------------|-------------|---------------|------------|-------------|
| C -3.25168807 | -0.75785010 | -0.63505078 | H -4.93313488 | 0.08626155 | -1.11877703 |
| H -2.55915811 | -1.41888476 | -1.17081931 | O -1.52513768 | 1.94936805 | 1.36638598  |
| H -3.57135230 | -1.29808829 | 0.26788143  | H -2.37868985 | 2.39127625 | 1.36154482  |
| O -4.33951145 | -0.55351729 | -1.52093186 |               |            |             |

**β-O-4 bottomC<sub>β</sub>-O<sub>α</sub>-side**

|               |             |             |               |            |             |
|---------------|-------------|-------------|---------------|------------|-------------|
| O -4.89219304 | -2.98884645 | 0.59513124  | C -1.99871820 | 2.55303756 | -1.74510782 |
| C -4.60377471 | -1.78754210 | 0.51479953  | O -3.28454239 | 2.84202191 | -1.18330545 |
| C -3.82563406 | 0.94444430  | 0.26054710  | H -4.03135064 | 3.03061005 | 0.68958052  |
| C -4.52975418 | -1.10781183 | -0.78628570 | H -1.67302544 | 1.84369571 | 1.49119663  |
| C -4.30102637 | -0.95596588 | 1.67870903  | H -0.72372822 | 1.19445280 | -0.62317667 |
| C -3.92573548 | 0.36697885  | 1.52465087  | H -2.07243591 | 1.69978942 | -2.42572247 |
| C -4.14954551 | 0.21639131  | -0.89580107 | H -1.69191557 | 3.43381525 | -2.31354040 |
| H -3.69869944 | 0.93851108  | 2.41856728  | C 0.18081164  | 3.16858376 | -0.40203815 |
| H -4.10259337 | 0.71652253  | -1.85311758 | O -0.09347884 | 3.98533735 | 0.73013813  |
| O -4.83779882 | -1.90103009 | -1.80897263 | C -1.48496977 | 3.95110158 | 0.99189576  |
| O -4.29930196 | -1.42584154 | 2.93139580  | H 0.30146894  | 3.80683327 | -1.28627332 |
| C -4.73165655 | -1.36830700 | -3.12091999 | H -2.02108285 | 4.65757281 | 0.34332250  |
| H -5.01079564 | -2.17798750 | -3.78979905 | H -1.63802159 | 4.23416478 | 2.03359816  |
| H -3.70402212 | -1.05483204 | -3.32327119 | C 1.44562273  | 2.37254631 | -0.18396790 |
| H -5.41768551 | -0.52705521 | -3.25240598 | C 3.59745847  | 0.65060482 | 0.16189484  |
| C -4.91486700 | -2.66853589 | 3.29082489  | C 2.12181196  | 1.88471938 | -1.29858114 |
| H -4.93503838 | -2.65635111 | 4.37863507  | C 1.85472754  | 2.04298771 | 1.10275641  |
| H -5.92660495 | -2.72863839 | 2.89176066  | C 2.94186296  | 1.18433967 | 1.27207894  |
| H -4.33526917 | -3.51228143 | 2.92335160  | C 3.20443666  | 1.02584292 | -1.12427899 |
| C -3.33766032 | 2.37638982  | 0.15010731  | H 1.78629926  | 2.16165537 | -2.28998681 |
| C -1.90273271 | 2.51868227  | 0.66610390  | H 1.33085060  | 2.47307533 | 1.94490607  |
| C -1.04574723 | 2.23264633  | -0.57751915 | O 3.92947101  | 0.48383493 | -2.13638071 |

|              |             |             |               |             |             |
|--------------|-------------|-------------|---------------|-------------|-------------|
| O 3.42658060 | 0.77935257  | 2.47460306  | O 4.65159325  | -2.33112299 | -1.49498385 |
| C 2.84945185 | 1.33992021  | 3.63814539  | H 4.75918372  | -1.39441792 | -1.71802330 |
| H 3.40046550 | 0.91967745  | 4.47616961  | C 2.32682216  | -2.00038017 | -0.84259070 |
| H 1.79196577 | 1.07072822  | 3.72423770  | C -0.25437115 | -1.27719355 | -1.66428377 |
| H 2.94798171 | 2.42895920  | 3.63819968  | C 1.33926132  | -1.69987200 | 0.10512020  |
| C 3.52539336 | 0.77967368  | -3.46155804 | C 1.99252177  | -1.96412350 | -2.18930774 |
| H 4.19789537 | 0.22342091  | -4.11124525 | C 0.70918261  | -1.60177504 | -2.60016111 |
| H 3.62194862 | 1.84962990  | -3.66587724 | C 0.06483964  | -1.33603102 | -0.29859720 |
| H 2.49502710 | 0.45581682  | -3.63326130 | H 1.56932867  | -1.73108577 | 1.16178733  |
| O 4.63897839 | -0.22272297 | 0.31738652  | H 2.74580097  | -2.21425802 | -2.92547611 |
| C 4.29075941 | -1.55111045 | 0.75532046  | H 0.44097887  | -1.57288410 | -3.64990965 |
| H 3.56468527 | -1.47571051 | 1.56820581  | O -0.96843154 | -1.00253303 | 0.53355403  |
| C 5.58164245 | -2.11095381 | 1.32322402  | O -1.50122874 | -0.90150258 | -2.05641906 |
| H 5.42003860 | -3.13765604 | 1.65802480  | H -2.04838397 | -0.76895522 | -1.26749845 |
| H 6.34535270 | -2.11520675 | 0.53831394  | C -0.69143943 | -0.96102939 | 1.92120663  |
| O 5.99533290 | -1.36555763 | 2.44792231  | H -1.61883327 | -0.66986435 | 2.40930867  |
| H 5.91292964 | -0.43501494 | 2.21066992  | H -0.38400909 | -1.94514539 | 2.28637173  |
| C 3.74651062 | -2.38152214 | -0.41640035 | H 0.09497347  | -0.22612808 | 2.12863723  |
| H 3.73356654 | -3.42699415 | -0.08673403 |               |             |             |

**β-O-4 bottomO-C<sub>PhO</sub>-side**

|               |             |             |               |             |             |
|---------------|-------------|-------------|---------------|-------------|-------------|
| O -3.01604171 | 0.99100755  | 0.69698603  | C -1.47248726 | -1.94864176 | -0.70004284 |
| C -2.02326485 | 0.24718839  | 0.12997232  | H 0.50031398  | -2.15862229 | -1.52264153 |
| C -0.20504045 | -1.48333703 | -1.05024078 | H -0.47830042 | 1.73909737  | -0.05481643 |
| C -2.38223751 | -1.09124371 | -0.11032968 | H -1.77280968 | -2.97166986 | -0.88870717 |
| C -0.76228381 | 0.70585660  | -0.20923221 | C -2.74167096 | 2.35382448  | 0.96205846  |
| C 0.15657944  | -0.16772403 | -0.80230501 | H -3.64722718 | 2.76679483  | 1.39966555  |

|               |             |             |              |             |             |
|---------------|-------------|-------------|--------------|-------------|-------------|
| H -2.50142437 | 2.88771825  | 0.03858328  | C 2.59559867 | -1.06380270 | 0.84797501  |
| H -1.91363123 | 2.45173883  | 1.66984209  | H 1.63461555 | -1.41251972 | 1.22519032  |
| O -3.61795601 | -1.53181931 | 0.22442938  | H 2.95535086 | -1.78733196 | 0.10294293  |
| H -4.10597104 | -0.79321932 | 0.60814563  | O 3.47461961 | -0.97024484 | 1.93981011  |
| C 1.54828661  | 0.32238601  | -1.10049415 | H 4.26329098 | -0.50791108 | 1.63656831  |
| H 2.01419682  | -0.34754912 | -1.83609220 | O 3.64411892 | 0.88181636  | -0.08155696 |
| C 2.43064135  | 0.30200076  | 0.17144083  | O 1.49425458 | 1.64042201  | -1.59581391 |
| H 1.96125369  | 0.99758733  | 0.89934982  | H 2.39365167 | 1.98739047  | -1.58167950 |

**β-O-4 bottomO-C<sub>Ph</sub> phenyl-side**

|               |             |             |               |            |             |
|---------------|-------------|-------------|---------------|------------|-------------|
| C -4.64750006 | -1.81728856 | 0.89405609  | C -3.56444766 | 2.17584297 | -0.07048513 |
| C -3.98975243 | 0.75459731  | 0.26836025  | C -2.12947594 | 2.45405032 | 0.38246870  |
| C -4.66256088 | -1.46007638 | -0.44225041 | C -1.28100894 | 1.99695693 | -0.81610526 |
| C -4.33505621 | -0.96385776 | 1.92399894  | C -2.26875630 | 2.06993590 | -1.99688597 |
| C -4.01006864 | 0.35915385  | 1.59746185  | O -3.54716019 | 2.42977051 | -1.46306506 |
| C -4.32748797 | -0.13669164 | -0.75592153 | H -4.27764809 | 2.88037310 | 0.36889861  |
| H -3.76692195 | 1.04540982  | 2.40226888  | H -1.86080023 | 1.93186439 | 1.30122921  |
| H -4.33583574 | 0.21880742  | -1.77712314 | H -0.91120144 | 0.98105405 | -0.69198003 |
| O -4.98513409 | -2.41044802 | -1.34477452 | H -2.33221938 | 1.10196184 | -2.50281050 |
| O -4.29733304 | -1.32741976 | 3.22591808  | H -2.00005990 | 2.83487483 | -2.72882669 |
| C -4.89813836 | -2.06029985 | -2.71687151 | C -0.09668206 | 3.00202610 | -0.83469276 |
| H -5.15693382 | -2.96132684 | -3.26754778 | O -0.37425865 | 3.97182672 | 0.16760464  |
| H -3.88108038 | -1.75040144 | -2.97260072 | C -1.75977099 | 3.93331487 | 0.46236083  |
| H -5.60813068 | -1.26570512 | -2.96332437 | H -0.03707051 | 3.49956549 | -1.81099941 |
| C -4.62491492 | -2.68370697 | 3.48906470  | H -2.33134981 | 4.50621104 | -0.28068531 |
| H -4.54757625 | -2.81348089 | 4.56583005  | H -1.90559906 | 4.37739596 | 1.44733896  |
| H -5.64340791 | -2.90464671 | 3.15787664  | C 1.21233938  | 2.30626294 | -0.54736809 |
| H -3.92691888 | -3.35397006 | 2.97884905  | C 3.45235645  | 0.75028273 | -0.02304273 |

|              |             |             |               |             |             |
|--------------|-------------|-------------|---------------|-------------|-------------|
| C 1.86748936 | 1.66816802  | -1.59700547 | O 6.00814339  | -0.76990348 | 2.46317501  |
| C 1.68590075 | 2.21090844  | 0.75581410  | H 5.86270680  | 0.10608251  | 2.08805259  |
| C 2.81688412 | 1.43489159  | 1.01334697  | C 3.71814230  | -2.32869383 | -0.10974069 |
| C 2.99402353 | 0.89266391  | -1.33413131 | H 3.76496838  | -3.30552070 | 0.38587475  |
| H 1.48105642 | 1.76369761  | -2.60385158 | O 4.58277927  | -2.42048519 | -1.21836833 |
| H 1.17381570 | 2.75234451  | 1.53884927  | H 4.63749649  | -1.53013252 | -1.59643543 |
| O 3.70371452 | 0.21899058  | -2.27602930 | C 2.26824094  | -2.08118234 | -0.53284441 |
| O 3.36651259 | 1.25381366  | 2.24263381  | C -0.37502477 | -1.62248624 | -1.35232305 |
| C 2.80619212 | 1.97278784  | 3.32445251  | C 1.29969410  | -1.67062711 | 0.39355419  |
| H 3.40765705 | 1.71927712  | 4.19424212  | C 1.88599374  | -2.28436606 | -1.85157658 |
| H 1.76697271 | 1.67717576  | 3.49967396  | C 0.57209390  | -2.05363674 | -2.26177843 |
| H 2.85125707 | 3.05026353  | 3.14363942  | C -0.00514068 | -1.43855362 | -0.01021640 |
| C 3.23528810 | 0.27576187  | -3.61172429 | H 1.56651391  | -1.51290944 | 1.43021439  |
| H 3.90725305 | -0.35313518 | -4.19206804 | H 2.62530280  | -2.61896380 | -2.56813169 |
| H 3.27406569 | 1.30025294  | -3.99227747 | H 0.26747995  | -2.21074543 | -3.29003945 |
| H 2.21518938 | -0.11235934 | -3.68100701 | O -1.02609396 | -1.02116703 | 0.79640598  |
| O 4.53689013 | -0.04565056 | 0.22712140  | O -1.65172233 | -1.37589485 | -1.74727104 |
| C 4.26326220 | -1.29658939 | 0.88821598  | H -2.17884011 | -1.12731954 | -0.97199452 |
| H 3.56147482 | -1.11801287 | 1.70639283  | C -0.71131488 | -0.72570745 | 2.14317972  |
| C 5.59577402 | -1.70390854 | 1.48865624  | H -1.64128036 | -0.40775239 | 2.60965279  |
| H 5.49331393 | -2.66908250 | 1.98903595  | H -0.33163642 | -1.61267344 | 2.65913489  |
| H 6.33427469 | -1.80260948 | 0.68599549  | H 0.03357098  | 0.07707662  | 2.19168562  |

**$\beta$ - $\beta'$  top $C_{\alpha}$ - $C_{\beta}$**

|              |            |             |              |            |             |
|--------------|------------|-------------|--------------|------------|-------------|
| O 1.56313573 | 4.47419125 | -1.46374462 | C 3.34027649 | 5.20005645 | -0.16133655 |
| C 2.51478705 | 4.12974485 | -0.55162887 | C 2.70925205 | 2.86632103 | -0.01949106 |
| C 4.54572950 | 3.71443725 | 1.29172053  | C 3.73951613 | 2.65486004 | 0.90668622  |

|              |             |             |               |             |             |
|--------------|-------------|-------------|---------------|-------------|-------------|
| C 4.34831981 | 4.98915528  | 0.75910633  | H 2.29019172  | -3.66955172 | -1.99230398 |
| H 5.34031059 | 3.55335929  | 2.01199480  | O 4.30204706  | -1.87028180 | -1.69501646 |
| H 2.06481798 | 2.03883341  | -0.29605260 | O 3.11521901  | -1.93579036 | 2.87104374  |
| H 4.96837820 | 5.82782026  | 1.05018881  | C 3.96760741  | -2.08402879 | -3.05992322 |
| C 0.73348326 | 3.43590459  | -1.95874806 | H 4.67742147  | -1.48898733 | -3.63005210 |
| H 0.03383642 | 3.90287874  | -2.64816128 | H 2.94809880  | -1.74263866 | -3.26002762 |
| H 0.18156743 | 2.95853871  | -1.14609498 | H 4.07275993  | -3.13921568 | -3.32515405 |
| H 1.32806188 | 2.68335143  | -2.48557439 | C 4.31320869  | -2.39595491 | 3.50628669  |
| O 3.13977740 | 6.43258619  | -0.68793409 | H 4.33211668  | -1.93854668 | 4.49351333  |
| H 2.40285607 | 6.37328601  | -1.30814185 | H 4.28370978  | -3.48404096 | 3.60275676  |
| C 3.98174075 | 1.25965593  | 1.42280097  | H 5.18935914  | -2.09097045 | 2.93195050  |
| H 4.73963308 | 1.29878488  | 2.21730249  | C 0.48294763  | -4.66528935 | -0.22136691 |
| C 4.52010216 | 0.35993966  | 0.30121545  | C -0.84829639 | -3.93566541 | 0.08853029  |
| H 3.80380234 | 0.33505777  | -0.52662363 | C -1.11239547 | -3.30781672 | -1.24427734 |
| C 5.88916333 | 0.80216952  | -0.18726067 | C -0.37645632 | -4.06263629 | -2.29546729 |
| H 5.84564268 | 1.85197328  | -0.48051589 | O 0.39595860  | -5.03761065 | -1.58772812 |
| H 6.59380660 | 0.70763707  | 0.65165824  | H 0.58935840  | -5.59094078 | 0.35200332  |
| O 6.33745372 | 0.07041669  | -1.30315425 | H -0.72195559 | -3.18143517 | 0.87159525  |
| H 6.01692048 | -0.83396545 | -1.21178869 | H -1.74703382 | -2.45364631 | -1.42956012 |
| O 4.68675240 | -0.98729857 | 0.81590401  | H 0.26901079  | -3.40196244 | -2.89081435 |
| C 3.70059744 | -1.89340630 | 0.55372599  | H -1.03014022 | -4.60454656 | -2.98984884 |
| C 1.66747600 | -3.75535072 | 0.05309474  | C -3.75737934 | -3.56282573 | 0.05937657  |
| C 3.47799570 | -2.37138103 | -0.74586963 | O -3.09395999 | -4.23996681 | 1.02419667  |
| C 2.93524597 | -2.41525533 | 1.59456705  | C -1.93134606 | -4.92273578 | 0.55637169  |
| C 1.92770804 | -3.33928576 | 1.35253694  | H -3.87840072 | -4.06448206 | -0.89692669 |
| C 2.46201759 | -3.29244346 | -0.99376581 | H -2.20044070 | -5.61463745 | -0.25183731 |
| H 1.33361177 | -3.68749358 | 2.19136733  | H -1.57503942 | -5.49875599 | 1.41140360  |

|               |             |             |               |             |             |
|---------------|-------------|-------------|---------------|-------------|-------------|
| C -4.08935240 | -2.21006773 | 0.23140363  | H -3.79656493 | 4.81071007  | 1.42158467  |
| C -4.65852629 | 0.51747690  | 0.48539394  | H -5.25300975 | 4.39432299  | 0.49328532  |
| C -4.56738108 | -1.47630248 | -0.88155677 | O -5.19961038 | 3.82405945  | 2.49328524  |
| C -3.89318412 | -1.55946040 | 1.47273019  | H -5.72565232 | 3.02311566  | 2.39447735  |
| C -4.19966871 | -0.21379079 | 1.59227796  | C -3.13051995 | 2.97614474  | -0.54922512 |
| C -4.82634540 | -0.12469382 | -0.75038634 | H -2.49254216 | 3.85817790  | -0.40721021 |
| H -4.69027656 | -1.98093757 | -1.83060649 | O -4.03144206 | 3.32207536  | -1.57563785 |
| H -3.52864186 | -2.13761793 | 2.30974229  | H -4.68047723 | 2.60394757  | -1.62503976 |
| O -5.22577662 | 0.68258385  | -1.77028193 | C -2.20843096 | 1.82440696  | -0.95547967 |
| O -4.06129751 | 0.50942410  | 2.73318413  | C -0.28053118 | -0.04827201 | -1.76446829 |
| C -3.73786876 | -0.18984828 | 3.92023979  | C -1.47754325 | 1.10103590  | -0.00242211 |
| H -3.74533154 | 0.55252838  | 4.71473386  | C -1.98692760 | 1.56827472  | -2.30284666 |
| H -2.74484159 | -0.64486232 | 3.85556160  | C -1.02477642 | 0.63844069  | -2.70658675 |
| H -4.47995940 | -0.96535369 | 4.12927327  | C -0.53662568 | 0.16108617  | -0.39818259 |
| C -5.19171137 | 0.14330258  | -3.08000394 | H -1.63430343 | 1.27125309  | 1.05402754  |
| H -5.44052247 | 0.96439161  | -3.74929169 | H -2.54609624 | 2.12687635  | -3.04329270 |
| H -5.93085954 | -0.65435569 | -3.19336574 | H -0.82549993 | 0.45630982  | -3.75643026 |
| H -4.19120729 | -0.23379048 | -3.31281974 | O 0.20828371  | -0.61332688 | 0.43620764  |
| O -4.97242601 | 1.84186059  | 0.58994879  | O 0.69521375  | -0.91459943 | -2.14622075 |
| O 2.76517978  | 0.74910909  | 1.93364673  | H 1.03977292  | -1.35358307 | -1.35232231 |
| H 2.94649130  | -0.08194427 | 2.39481726  | C 0.00106099  | -0.43953664 | 1.82923213  |
| C -3.88455474 | 2.76879743  | 0.76891608  | H 0.66455510  | -1.14358804 | 2.32643659  |
| H -3.22924114 | 2.40028249  | 1.56045121  | H 0.26773114  | 0.57495524  | 2.13317928  |
| C -4.55338692 | 4.04097763  | 1.25814760  | H -1.04201931 | -0.66284150 | 2.08055916  |

**$\beta$ - $\beta'$  topC<sub>g</sub>-O**

|              |            |             |              |            |             |
|--------------|------------|-------------|--------------|------------|-------------|
| O 1.71932121 | 4.82809496 | -0.80010033 | C 2.79903627 | 4.23613729 | -0.21549378 |
|--------------|------------|-------------|--------------|------------|-------------|



|               |             |             |               |             |             |
|---------------|-------------|-------------|---------------|-------------|-------------|
| C 5.13177348  | 3.29902587  | 0.95390260  | C 2.77866580  | -2.57138337 | 1.50593966  |
| C 3.90786586  | 5.08970261  | -0.07778332 | C 1.72043865  | -3.47081530 | 1.44176556  |
| C 2.86537036  | 2.92359446  | 0.22366171  | C 1.90433735  | -3.49582482 | -0.95793204 |
| C 4.04634192  | 2.44841945  | 0.80692388  | H 1.25485418  | -3.78773344 | 2.36958840  |
| C 5.06678109  | 4.61948383  | 0.50952152  | H 1.57840634  | -3.89176595 | -1.90985188 |
| H 6.04381353  | 2.93494399  | 1.41457232  | O 3.66392339  | -2.15426357 | -1.95995019 |
| H 2.01265140  | 2.25888743  | 0.13764027  | O 3.16724492  | -2.07787375 | 2.72976120  |
| H 5.90452281  | 5.29682052  | 0.61891298  | C 3.19560753  | -2.48025602 | -3.26206223 |
| C 0.52567924  | 4.06713115  | -0.86324652 | H 3.85856930  | -1.95638130 | -3.94674460 |
| H -0.22068163 | 4.69671102  | -1.34372712 | H 2.17002805  | -2.12823900 | -3.39876272 |
| H 0.19491863  | 3.79702519  | 0.14332911  | H 3.25766163  | -3.55761353 | -3.43644163 |
| H 0.66727918  | 3.15622087  | -1.45170683 | C 4.40921284  | -2.60866216 | 3.20668297  |
| O 3.83080769  | 6.37141859  | -0.51144607 | H 4.59709856  | -2.13357594 | 4.16748876  |
| H 2.94674895  | 6.50860086  | -0.87320710 | H 4.32062234  | -3.68975536 | 3.33878290  |
| C 4.13808832  | 0.99803954  | 1.20752018  | H 5.21392875  | -2.37795356 | 2.50674878  |
| H 5.01049793  | 0.86447318  | 1.86194615  | C 0.06849350  | -4.84961161 | 0.13515344  |
| C 4.34523214  | 0.09818354  | -0.02028769 | C -1.24580184 | -4.11827803 | 0.47203200  |
| H 3.47495180  | 0.16768467  | -0.68331308 | C -1.52023694 | -3.44355473 | -0.89223004 |
| C 5.63005010  | 0.42702911  | -0.76538110 | C -1.05195310 | -4.53036240 | -1.87242298 |
| H 5.60739259  | 1.47252747  | -1.07406997 | O -0.12376921 | -5.35766612 | -1.17433270 |
| H 6.46878827  | 0.29442012  | -0.06584721 | H 0.23739836  | -5.70566329 | 0.79587836  |
| O 5.81739097  | -0.35015273 | -1.92253299 | H -1.08873542 | -3.38754162 | 1.26872280  |
| H 5.44282820  | -1.22270886 | -1.75828875 | H -0.82446437 | -2.59521497 | -0.94870956 |
| O 4.48011312  | -1.27318992 | 0.44195022  | H -0.57657580 | -4.09571154 | -2.75703851 |
| C 3.40551783  | -2.10804230 | 0.35193842  | H -1.88944371 | -5.15551276 | -2.19948996 |
| C 1.26886303  | -3.92077042 | 0.20871199  | C -2.87018228 | -2.92407071 | -1.26799384 |
| C 2.97148128  | -2.60338033 | -0.88885659 | O -3.38496809 | -4.50140897 | 1.57937903  |

|               |             |             |               |             |             |
|---------------|-------------|-------------|---------------|-------------|-------------|
| C -2.35245073 | -5.08525100 | 0.89485538  | H -3.18012484 | 2.34914406  | 1.85539670  |
| H -3.21679320 | -3.19435636 | -2.26154230 | C -4.54922463 | 3.98161408  | 1.74999095  |
| H -2.74354427 | -5.67448628 | 0.04981419  | H -3.83221621 | 4.72881397  | 2.09591777  |
| H -1.95531708 | -5.83908687 | 1.60313305  | H -5.20884433 | 4.44685546  | 1.01010089  |
| C -3.48365316 | -1.76966784 | -0.68497858 | O -5.26724129 | 3.54007591  | 2.88094164  |
| C -4.44477439 | 0.67557382  | 0.28934024  | H -5.78319675 | 2.77624267  | 2.60177027  |
| C -4.17538488 | -0.88493860 | -1.53733385 | C -2.97415076 | 3.28333442  | -0.11382517 |
| C -3.35061733 | -1.44628588 | 0.67754008  | H -2.35661075 | 4.12163564  | 0.23411149  |
| C -3.86165917 | -0.25042281 | 1.16165099  | O -3.81371888 | 3.81555069  | -1.11090335 |
| C -4.61123539 | 0.33869233  | -1.06008647 | H -4.46637913 | 3.13145985  | -1.32552688 |
| H -4.26524987 | -1.13578319 | -2.58521478 | C -2.03698750 | 2.20503310  | -0.66201538 |
| H -2.89144360 | -2.15393562 | 1.35071318  | C -0.31702388 | 0.22430797  | -1.65451926 |
| O -5.15480692 | 1.31588300  | -1.83741351 | C -1.29762281 | 1.40132404  | 0.21577633  |
| O -3.77122780 | 0.13640999  | 2.46260129  | C -1.88370002 | 2.01851671  | -2.02918961 |
| C -3.58868534 | -0.88725016 | 3.42825675  | C -1.02217537 | 1.03416648  | -2.52498990 |
| H -3.74901485 | -0.41708537 | 4.39579589  | C -0.46765637 | 0.40505399  | -0.26900364 |
| H -2.57679368 | -1.30172507 | 3.39184454  | H -1.39736775 | 1.52939687  | 1.28550179  |
| H -4.31019328 | -1.69424835 | 3.27612772  | H -2.43582457 | 2.65028378  | -2.71407293 |
| C -5.22967835 | 1.07396167  | -3.23165165 | H -0.89162572 | 0.88750046  | -3.59071520 |
| H -5.64365933 | 1.97886509  | -3.67114015 | O 0.23208734  | -0.47982676 | 0.49462651  |
| H -5.89035229 | 0.22950465  | -3.44530889 | O 0.51286926  | -0.75220346 | -2.11513065 |
| H -4.23452260 | 0.88250319  | -3.64437904 | H 0.92612089  | -1.17847092 | -1.34830074 |
| O -4.84516088 | 1.91234272  | 0.70764860  | C 0.11510470  | -0.33258089 | 1.90155637  |
| O 2.95421146  | 0.63823746  | 1.89144666  | H 0.70968950  | -1.12803085 | 2.34400559  |
| H 3.08330127  | -0.22965165 | 2.29961004  | H 0.51487260  | 0.63268161  | 2.21974042  |
| C -3.80431136 | 2.82990403  | 1.09913939  | H -0.93323442 | -0.43331577 | 2.20038241  |

**$\beta$ - $\beta'$  top $C_{\beta}$ - $C_{\gamma}$** 

|               |             |             |               |             |             |
|---------------|-------------|-------------|---------------|-------------|-------------|
| O 1.62233517  | 4.89610993  | -0.80642524 | C 3.47108399  | -2.03080908 | 0.39956857  |
| C 2.69044545  | 4.32753982  | -0.17889207 | C 1.43860755  | -3.96760176 | 0.27040268  |
| C 4.99623926  | 3.43886100  | 1.07849211  | C 3.08589401  | -2.58479344 | -0.83230861 |
| C 3.77085283  | 5.20746422  | 0.01086080  | C 2.85362873  | -2.50188572 | 1.55562021  |
| C 2.77086871  | 3.01403795  | 0.25482542  | C 1.84841653  | -3.45837458 | 1.49734498  |
| C 3.93905565  | 2.56337714  | 0.88173309  | C 2.07074515  | -3.53938591 | -0.89615355 |
| C 4.91589610  | 4.76140843  | 0.64227480  | H 1.39798990  | -3.78358300 | 2.42901566  |
| H 5.89828725  | 3.09306433  | 1.57156141  | H 1.79073514  | -3.96411757 | -1.84946648 |
| H 1.93948978  | 2.32870708  | 0.12972781  | O 3.76651627  | -2.12577414 | -1.90561919 |
| H 5.73155016  | 5.45814735  | 0.79002138  | O 3.20089578  | -1.97064867 | 2.77552146  |
| C 0.46281013  | 4.09474050  | -0.94841332 | C 3.31976924  | -2.48800104 | -3.20618656 |
| H -0.27638580 | 4.70270052  | -1.46658531 | H 3.95276481  | -1.93185349 | -3.89373641 |
| H 0.08310040  | 3.80043383  | 0.03375329  | H 2.27610410  | -2.19602628 | -3.34470683 |
| H 0.67311629  | 3.19657471  | -1.53573987 | H 3.44459558  | -3.56122944 | -3.37243879 |
| O 3.67997899  | 6.49001954  | -0.41751324 | C 4.46879073  | -2.41895333 | 3.26995249  |
| H 2.81041343  | 6.60741392  | -0.81911853 | H 4.61791763  | -1.92105429 | 4.22595828  |
| C 4.05234189  | 1.11121065  | 1.26860385  | H 4.44417837  | -3.50162790 | 3.41550471  |
| H 4.92561123  | 0.98615066  | 1.92371282  | H 5.26439028  | -2.14859624 | 2.57395978  |
| C 4.28485515  | 0.22872235  | 0.03202067  | C 0.29247132  | -4.96687761 | 0.25146666  |
| H 3.40281726  | 0.25619533  | -0.61900285 | C -1.01533817 | -4.28631571 | 0.70595630  |
| C 5.54043886  | 0.62642090  | -0.73013302 | C -1.46564745 | -3.10949237 | -0.09305741 |
| H 5.45479258  | 1.66730080  | -1.04314545 | C -0.42007025 | -5.12968523 | -2.05116485 |
| H 6.39404870  | 0.54624532  | -0.04052254 | O 0.20322183  | -5.67745867 | -0.97766411 |
| O 5.75658162  | -0.14479724 | -1.88580279 | H 0.52278749  | -5.75405279 | 0.97485720  |
| H 5.44139074  | -1.03859653 | -1.71084971 | H -0.82766626 | -3.97372141 | 1.74374013  |
| O 4.49732965  | -1.13740464 | 0.48288575  | H -0.85893741 | -2.26883724 | -0.39081909 |

|               |             |             |               |             |             |
|---------------|-------------|-------------|---------------|-------------|-------------|
| H -0.56219234 | -4.05746170 | -2.09998937 | O 2.87295813  | 0.72605836  | 1.94663325  |
| H -0.31464268 | -5.73097410 | -2.94263091 | H 3.01833276  | -0.14146486 | 2.34941436  |
| C -2.92554716 | -3.25796264 | -0.39413509 | C -3.93695691 | 2.81791884  | 0.77295128  |
| O -3.35957777 | -4.26132396 | 0.51955035  | H -3.38638399 | 2.32548407  | 1.57864972  |
| C -2.27830844 | -5.17032183 | 0.67425963  | C -4.68223282 | 4.00188230  | 1.36050363  |
| H -3.08480177 | -3.61845268 | -1.42552463 | H -3.96708465 | 4.74860605  | 1.71194887  |
| H -2.23865791 | -5.86206353 | -0.17541312 | H -5.30548993 | 4.45386755  | 0.58136541  |
| H -2.44209655 | -5.73264006 | 1.59297469  | O -5.44969253 | 3.60189927  | 2.47454949  |
| C -3.65595328 | -1.95385318 | -0.20012997 | H -5.89803240 | 2.78512868  | 2.22708948  |
| C -4.59159506 | 0.62934963  | 0.14604595  | C -3.00540127 | 3.21336098  | -0.38266009 |
| C -3.95432223 | -1.18142262 | -1.31483641 | H -2.41494436 | 4.06731928  | -0.02640039 |
| C -3.87616501 | -1.47897167 | 1.08987406  | O -3.76248812 | 3.69885288  | -1.46566826 |
| C -4.35796870 | -0.18442371 | 1.25969925  | H -4.38336311 | 2.99431375  | -1.70470116 |
| C -4.43068208 | 0.11821080  | -1.13937310 | C -2.02399343 | 2.11852947  | -0.81122594 |
| H -3.78034718 | -1.58282340 | -2.30439204 | C -0.16971267 | 0.18089441  | -1.63240173 |
| H -3.65672856 | -2.12458147 | 1.92985144  | C -1.32492833 | 1.35951676  | 0.13976532  |
| O -4.72754700 | 0.97362557  | -2.15251598 | C -1.76532774 | 1.90472121  | -2.15817969 |
| O -4.59713408 | 0.40608306  | 2.45818332  | C -0.84614837 | 0.93628612  | -2.57062226 |
| C -4.38008204 | -0.36615046 | 3.62365155  | C -0.40787529 | 0.40147479  | -0.26417798 |
| H -4.64677550 | 0.27504163  | 4.46036712  | H -1.49425471 | 1.51431975  | 1.19783714  |
| H -3.32975969 | -0.66212785 | 3.70913001  | H -2.28547101 | 2.50343275  | -2.89514890 |
| H -5.01153402 | -1.25890991 | 3.62451974  | H -0.64117666 | 0.76604549  | -3.62119683 |
| C -4.54650425 | 0.50490435  | -3.47726126 | O 0.32143858  | -0.40558618 | 0.55406780  |
| H -4.81997710 | 1.33274774  | -4.12815461 | O 0.71803045  | -0.77798341 | -2.01031809 |
| H -5.19932959 | -0.34904722 | -3.67780784 | H 1.09287322  | -1.17368963 | -1.20850231 |
| H -3.50316105 | 0.22761494  | -3.65219354 | C 0.05462724  | -0.33485872 | 1.94426827  |
| O -4.97483764 | 1.93255450  | 0.31012215  | H 0.69510089  | -1.07759571 | 2.41496595  |

H 0.30919381 0.65359326 2.33344859 H -0.99892752 -0.57328223 2.13194707

**$\beta$ - $\beta'$  topC<sub>y</sub>-O**

O 1.80691532 4.85730698 -0.77021010 H 5.39274014 -1.24165947 -1.74724064

C 2.85779065 4.23704549 -0.16270064 O 4.46638049 -1.31009363 0.45725397

C 5.13439256 3.23649928 1.06359219 C 3.41316553 -2.17262222 0.38495606

C 3.97444353 5.06924958 0.03101584 C 1.32162751 -4.03264186 0.27358137

C 2.88827697 2.91490105 0.25043542 C 3.00670388 -2.71923616 -0.84561213

C 4.04041469 2.40825987 0.86336271 C 2.78267410 -2.61052542 1.54664355

C 5.10532030 4.56714392 0.64588395 C 1.74270496 -3.53162272 1.49719657

H 6.02457651 2.84730665 1.54578957 C 1.96072978 -3.63753364 -0.89989940

H 2.02907879 2.26586976 0.12209886 H 1.27250226 -3.83030963 2.42878494

H 5.95011275 5.22759373 0.79657577 H 1.63879697 -4.05911253 -1.84255693

C 0.62772155 4.09096076 -0.94185752 O 3.69358727 -2.28241880 -1.92319791

H -0.09578166 4.73429015 -1.43918115 O 3.14869650 -2.07900470 2.76147044

H 0.23767147 3.77087725 0.02808661 C 3.21153636 -2.62126452 -3.21777098

H 0.81915570 3.20932329 -1.55925855 H 3.84574567 -2.07734178 -3.91392335

O 3.93269065 6.36109800 -0.37701075 H 2.17324624 -2.30029237 -3.33107789

H 3.06625896 6.51965839 -0.77109251 H 3.30258619 -3.69622633 -3.39370988

C 4.09094291 0.94991426 1.23972434 C 4.40477772 -2.55855090 3.25652851

H 4.95416643 0.78422709 1.89902951 H 4.57130455 -2.05596812 4.20723621

C 4.29111199 0.06068372 0.00269646 H 4.34958314 -3.63863218 3.41266184

H 3.40637666 0.11199866 -0.64343702 H 5.20553577 -2.31801011 2.55558027

C 5.55385160 0.41915446 -0.76679907 C 0.13353123 -4.97668463 0.22318121

H 5.49750607 1.46180106 -1.08074092 C -1.19316913 -4.21723288 0.46189048

H 6.40871368 0.31459522 -0.08193983 C -1.60917982 -3.19338969 -0.62376712

O 5.74040002 -0.35991063 -1.92232911 C -1.13649559 -3.46319984 -2.00785176

|               |             |             |               |             |             |
|---------------|-------------|-------------|---------------|-------------|-------------|
| O 0.07512871  | -5.78412768 | -0.87726413 | H -4.65438786 | 1.58883587  | -4.10651389 |
| H 0.21324297  | -5.69142048 | 1.06783872  | H -5.15042012 | -0.07972456 | -3.72685356 |
| H -1.06734392 | -3.67120051 | 1.40186882  | H -3.42225015 | 0.38603754  | -3.63885464 |
| H -1.28471294 | -2.19455863 | -0.32559513 | O -4.86720847 | 2.05526128  | 0.33936473  |
| H -1.09135763 | -2.65100897 | -2.72146432 | O 2.89181030  | 0.61170482  | 1.90966994  |
| H -1.05069205 | -4.48073826 | -2.37569124 | H 3.00419447  | -0.25727884 | 2.31995265  |
| C -3.19005901 | -3.25492627 | -0.52226671 | C -3.81550341 | 2.90282322  | 0.83814320  |
| O -3.49341883 | -4.14737765 | 0.53581355  | H -3.29729558 | 2.38409419  | 1.64831577  |
| C -2.43738385 | -5.08798790 | 0.59462616  | C -4.53977064 | 4.09982674  | 1.42576679  |
| H -3.58386594 | -3.66327660 | -1.46148258 | H -3.81141240 | 4.81805718  | 1.80800613  |
| H -2.50332426 | -5.80650717 | -0.23244124 | H -5.12801896 | 4.58365829  | 0.63867950  |
| H -2.50890003 | -5.62122094 | 1.54321138  | O -5.34848034 | 3.70694551  | 2.51292113  |
| C -3.77327556 | -1.89301190 | -0.27248640 | H -5.82470743 | 2.91625873  | 2.23535000  |
| C -4.52974129 | 0.74332521  | 0.14559540  | C -2.84957271 | 3.28765179  | -0.29174576 |
| C -4.01471214 | -1.06747538 | -1.36643577 | H -2.23311556 | 4.11112665  | 0.09113990  |
| C -3.94413254 | -1.43250181 | 1.02898045  | O -3.56832062 | 3.82207388  | -1.37830189 |
| C -4.33643645 | -0.11027457 | 1.23398951  | H -4.20890523 | 3.14491224  | -1.64361718 |
| C -4.39526735 | 0.25624167  | -1.15461800 | C -1.90900886 | 2.16039527  | -0.72417721 |
| H -3.88131758 | -1.45729993 | -2.36736309 | C -0.13907981 | 0.14630315  | -1.54535261 |
| H -3.78091532 | -2.11423234 | 1.85200786  | C -1.27174093 | 1.34697575  | 0.22533256  |
| O -4.63532805 | 1.15637349  | -2.14340866 | C -1.63417816 | 1.95993120  | -2.06934999 |
| O -4.53184410 | 0.45936791  | 2.45062034  | C -0.75453297 | 0.95536019  | -2.48137583 |
| C -4.39422451 | -0.36522078 | 3.59204844  | C -0.40371842 | 0.34475182  | -0.17798869 |
| H -4.62011473 | 0.26850542  | 4.44633035  | H -1.45797641 | 1.48945813  | 1.28205310  |
| H -3.37301658 | -0.74879721 | 3.68065583  | H -2.10768903 | 2.59846080  | -2.80443631 |
| H -5.09569832 | -1.20326306 | 3.55622496  | H -0.52955873 | 0.79923561  | -3.53020465 |
| C -4.45058388 | 0.72318239  | -3.47964753 | O 0.24117465  | -0.53192419 | 0.63989767  |

|              |             |             |               |             |            |
|--------------|-------------|-------------|---------------|-------------|------------|
| O 0.71897705 | -0.83340546 | -1.92851048 | H 0.65008756  | -1.15389983 | 2.51025890 |
| H 0.98443408 | -1.33365365 | -1.14124040 | H 0.39773415  | 0.59913832  | 2.36622170 |
| C 0.04799556 | -0.38156765 | 2.03575761  | H -1.00953544 | -0.52329993 | 2.28637404 |

**$\beta$ - $\beta'$  topC $_{\alpha}$ -C $_{\beta}$   $\alpha$ -side**

|               |             |             |               |             |             |
|---------------|-------------|-------------|---------------|-------------|-------------|
| O -4.47503800 | 3.38868037  | 0.38716562  | H -3.11778227 | -3.20737785 | 0.31595246  |
| C -4.54691256 | 2.09088474  | -0.03433910 | O -2.31722078 | -2.81766288 | 2.18667993  |
| C -4.98145288 | -0.50737995 | -0.89696218 | H -1.36913463 | -2.94372562 | 2.06599498  |
| C -5.85803945 | 1.59573617  | -0.13118476 | O -0.75515780 | -2.30952763 | -0.14712960 |
| C -3.46803734 | 1.28644054  | -0.35816102 | C 0.49890393  | -1.77367143 | -0.07375789 |
| C -3.68483085 | -0.02681115 | -0.79022482 | C 3.10592142  | -0.75008201 | 0.05139896  |
| C -6.06900284 | 0.29992554  | -0.56404127 | C 1.10179349  | -1.50820744 | 1.16489993  |
| H -5.15491635 | -1.52088192 | -1.24270570 | C 1.24006472  | -1.56239092 | -1.23248918 |
| H -2.45309805 | 1.66041055  | -0.31520991 | C 2.53157105  | -1.05087166 | -1.17760511 |
| H -7.08736784 | -0.05920058 | -0.64495001 | C 2.39206999  | -0.99328199 | 1.22530391  |
| C -3.18973500 | 3.97053064  | 0.48357442  | H 3.05577302  | -0.89606495 | -2.11337158 |
| H -3.34289623 | 4.99431532  | 0.81669834  | H 2.86991896  | -0.79236919 | 2.17461798  |
| H -2.68915218 | 3.96939262  | -0.48870541 | O 0.33699979  | -1.79786853 | 2.24632619  |
| H -2.57480672 | 3.43465155  | 1.21244329  | O 0.66126444  | -1.80457827 | -2.45590129 |
| O -6.90947284 | 2.39091985  | 0.18638326  | C 0.83215095  | -1.46472561 | 3.53148831  |
| H -6.56247650 | 3.25043328  | 0.45353479  | H 0.04068614  | -1.72874502 | 4.22915463  |
| C -2.49126209 | -0.90025449 | -1.09176607 | H 1.04283294  | -0.39389567 | 3.59944895  |
| H -2.81616993 | -1.74989143 | -1.70825205 | H 1.73669267  | -2.03391850 | 3.76156101  |
| C -1.88520889 | -1.46905000 | 0.20081294  | C 0.53933287  | -3.19308778 | -2.77769064 |
| H -1.53534205 | -0.64642186 | 0.83390085  | H 0.06985205  | -3.24102232 | -3.75831199 |
| C -2.84897828 | -2.36150799 | 0.96569314  | H 1.53125723  | -3.65017115 | -2.82058898 |
| H -3.75733232 | -1.80315094 | 1.19381795  | H -0.07929584 | -3.70365857 | -2.03765894 |

|              |             |             |               |             |             |
|--------------|-------------|-------------|---------------|-------------|-------------|
| C 4.53366563 | -0.22739492 | 0.13740930  | H 4.92482302  | 2.13466744  | 2.25293690  |
| C 4.82091524 | 0.95634093  | -0.79644784 | C 5.74328896  | 3.04865833  | -0.12219991 |
| C 4.52112779 | 2.20218764  | 0.07968787  | O 6.58803275  | 2.50822769  | -1.04202683 |
| C 4.34664457 | 1.60665367  | 1.49541941  | C 6.31615820  | 1.11048273  | -1.10879882 |
| O 4.84498502 | 0.27400206  | 1.42563061  | H 5.77287716  | 4.12817696  | -0.07265156 |
| H 5.22171978 | -1.05925491 | -0.04296739 | H 6.91799508  | 0.59901895  | -0.34986112 |
| H 4.22371972 | 0.94378125  | -1.70605172 | H 6.59972582  | 0.76348802  | -2.10127185 |
| H 3.60629063 | 2.71490052  | -0.23001433 | O -1.53599660 | -0.12297921 | -1.78303887 |
| H 3.28771781 | 1.59666657  | 1.77863682  | H -0.87017039 | -0.70860163 | -2.16895610 |

**$\beta$ - $\beta'$  topC $_{\alpha}$ -C $_{Ph}$  phenyl-side**

|               |             |             |               |             |             |
|---------------|-------------|-------------|---------------|-------------|-------------|
| C 0.74042642  | 1.59654433  | 2.31488508  | H 0.98562501  | -2.33233872 | 3.51197034  |
| C -1.10640396 | 0.06233575  | 1.07980685  | H 1.95591564  | -2.28039962 | 2.00449352  |
| C 0.91149546  | 0.24043834  | 2.41559594  | O -2.01986302 | -0.72329966 | 0.43092574  |
| C -0.27846753 | 2.26366122  | 1.68366266  | C -1.93726444 | -0.73981675 | -1.00933343 |
| C -1.23241675 | 1.45455087  | 1.04920272  | H -1.78192522 | 0.28055631  | -1.36741763 |
| C -0.06236159 | -0.54647955 | 1.78413312  | C -3.31344792 | -1.19245609 | -1.46019022 |
| H 1.75064810  | -0.19379619 | 2.94144674  | H -3.33493147 | -1.27147935 | -2.54905240 |
| H -0.34627454 | 3.34341436  | 1.68463667  | H -3.52303209 | -2.17911750 | -1.03402393 |
| O -0.07065009 | -1.90119209 | 1.78091625  | O -4.29416860 | -0.24679110 | -1.09044688 |
| O -2.30375325 | 1.91920047  | 0.35784215  | H -4.11447510 | -0.00362135 | -0.17520268 |
| C -2.52124908 | 3.31688094  | 0.34239457  | C -0.81684245 | -1.67953748 | -1.47604193 |
| H -3.43173670 | 3.47098804  | -0.23169419 | H -0.95261820 | -1.82819505 | -2.55366853 |
| H -1.69125378 | 3.84031151  | -0.14256301 | O -0.99209189 | -2.94977193 | -0.88984945 |
| H -2.65424747 | 3.70303526  | 1.35696068  | H -0.97315988 | -2.81162681 | 0.06866410  |
| C 0.99502851  | -2.56214221 | 2.44297486  | C 0.59153596  | -1.13253479 | -1.23449547 |
| H 0.82342828  | -3.62651283 | 2.29757770  | C 3.16286605  | -0.16361011 | -0.67366462 |



|              |             |             |              |            |             |
|--------------|-------------|-------------|--------------|------------|-------------|
| C 0.89055334 | 0.22648095  | -1.40866199 | O 2.55516941 | 2.01062635 | -1.21844514 |
| C 1.60298859 | -1.99038037 | -0.82612453 | O 4.39567115 | 0.31609592 | -0.37485829 |
| C 2.88368486 | -1.51071817 | -0.54742310 | H 4.38380128 | 1.27087539 | -0.51263422 |
| C 2.15622983 | 0.70707565  | -1.11966765 | C 1.58476599 | 2.96172654 | -1.60551738 |
| H 0.12692683 | 0.91714432  | -1.74123578 | H 2.08230870 | 3.92880407 | -1.59146498 |
| H 1.38358704 | -3.04380392 | -0.70700695 | H 1.21627658 | 2.75456282 | -2.61471763 |
| H 3.67691812 | -2.17477168 | -0.22428158 | H 0.74898153 | 2.96491281 | -0.89867423 |

**$\beta$ -O-4 topC <sub>$\alpha$</sub> -C <sub>$\beta$</sub>   $\alpha$ -side**

|               |             |             |               |             |             |
|---------------|-------------|-------------|---------------|-------------|-------------|
| C 2.57185567  | 0.97479184  | 0.02164059  | H 0.13182390  | 1.98286180  | 0.01054519  |
| H 2.57367582  | 2.05346475  | 0.08309824  | H 2.28889527  | -1.76741473 | 0.08087933  |
| O 3.81663122  | 0.44981939  | -0.03520210 | H 0.15274840  | -2.97669464 | 0.02389836  |
| H 3.77206960  | -0.48811304 | -0.24321069 | O -2.29754147 | 0.73303969  | -0.01143351 |
| C 1.38719464  | 0.21881566  | 0.02443258  | O -2.20935140 | -1.90422017 | -0.01987387 |
| C -1.03938340 | -1.21890474 | -0.00343642 | H -2.93019777 | -1.26319379 | -0.02581267 |
| C 0.13525051  | 0.90024926  | 0.01454481  | C -2.40373900 | 2.14261765  | -0.00470817 |
| C 1.36862051  | -1.19578581 | 0.03403726  | H -3.46730103 | 2.36870422  | -0.01254233 |
| C 0.16957879  | -1.89374010 | 0.01459435  | H -1.94543812 | 2.56200199  | 0.89557330  |
| C -1.04333880 | 0.19319436  | 0.00092235  | H -1.93041636 | 2.57184340  | -0.89251702 |

**$\beta$ -O-4 topC <sub>$\alpha$</sub> -C <sub>$\beta$</sub>   $\beta$ -side**

|              |             |             |              |             |             |
|--------------|-------------|-------------|--------------|-------------|-------------|
| O 4.23009943 | 1.58104703  | -2.01006967 | H 4.95334075 | -2.21417020 | 1.50596609  |
| C 4.36158618 | 0.58621459  | -1.06541920 | H 2.28854154 | 0.44769354  | -0.55999561 |
| C 4.78459344 | -1.42773189 | 0.77729023  | H 6.87775772 | -1.25151119 | 0.25857751  |
| C 5.65731453 | 0.10559508  | -0.84802663 | C 4.04691233 | 2.88845752  | -1.44909848 |
| C 3.28103234 | 0.04767659  | -0.38322590 | H 4.00104568 | 3.57899379  | -2.28975987 |
| C 3.48698559 | -0.97827558 | 0.54028985  | H 4.89477782 | 3.14013182  | -0.80381281 |
| C 5.86827914 | -0.89999366 | 0.08570744  | H 3.11522358 | 2.93506135  | -0.88712338 |

|               |             |             |               |             |             |
|---------------|-------------|-------------|---------------|-------------|-------------|
| O 6.70111470  | 0.62806488  | -1.53660630 | H 0.23632511  | -2.70839814 | 4.82144415  |
| H 6.33206834  | 1.23117175  | -2.19488104 | H -1.24387236 | -3.56341609 | 4.31220066  |
| C 2.31255955  | -1.63754008 | 1.22348323  | H 0.30161644  | -3.86143975 | 3.45611754  |
| H 2.66494942  | -2.12388125 | 2.14337023  | C -4.51554779 | -1.34801627 | 0.30152080  |
| C 1.69360191  | -2.73325591 | 0.33868621  | C -4.12126013 | 0.11472395  | 0.08297940  |
| H 1.22345379  | -2.26753997 | -0.53521765 | C -3.70798784 | 0.10018818  | -1.39312648 |
| C 2.68842613  | -3.79820931 | -0.09670891 | C -4.74152373 | -0.86481342 | -1.98166994 |
| H 3.50457208  | -3.33181755 | -0.64827243 | O -5.12704687 | -1.74671916 | -0.91811066 |
| H 3.10724743  | -4.26762811 | 0.80588044  | H -5.24664316 | -1.48527968 | 1.10300242  |
| O 2.10858333  | -4.76279215 | -0.94162245 | H -3.30644050 | 0.42660231  | 0.73430332  |
| H 1.19785552  | -4.89779273 | -0.65510491 | H -2.69328918 | -0.26858919 | -1.53054533 |
| O 0.67717563  | -3.43605915 | 1.10175904  | H -4.33705929 | -1.46020123 | -2.80390130 |
| C -0.62060936 | -3.03741368 | 0.94544704  | H -5.63027030 | -0.33286198 | -2.33565001 |
| C -3.23721439 | -2.11811857 | 0.59410043  | C -3.84853394 | 1.57801765  | -1.76057323 |
| C -1.33534671 | -3.35571833 | -0.21791260 | O -4.99477920 | 2.01821192  | -1.04501989 |
| C -1.27419365 | -2.34688746 | 1.96329128  | C -5.25270674 | 1.14828030  | 0.06596754  |
| C -2.57429035 | -1.89014780 | 1.79406921  | H -4.03918657 | 1.74437228  | -2.82465022 |
| C -2.63438866 | -2.88702344 | -0.39832136 | H -6.22829049 | 0.67468113  | -0.08252828 |
| H -3.01785546 | -1.29534077 | 2.58542326  | H -5.28528101 | 1.74270863  | 0.98213670  |
| H -3.18406359 | -3.09178350 | -1.30732076 | C -2.57348054 | 2.28513337  | -1.32211745 |
| O -0.65273461 | -4.10028642 | -1.12231955 | C -0.16256465 | 3.18295642  | -0.28733484 |
| O -0.58739464 | -2.01220428 | 3.10554132  | C -1.38043451 | 1.94939320  | -1.96096495 |
| C -1.24202361 | -4.32672372 | -2.38980035 | C -2.57705707 | 3.10676364  | -0.20300655 |
| H -0.50295026 | -4.88007765 | -2.96459814 | C -1.36038268 | 3.55474078  | 0.31855780  |
| H -1.46233581 | -3.37830297 | -2.88903225 | C -0.16728707 | 2.38900037  | -1.43623993 |
| H -2.15843069 | -4.91552290 | -2.29625588 | H -1.40042010 | 1.30544690  | -2.83137421 |
| C -0.30673111 | -3.11649339 | 3.97130082  | H -3.52099978 | 3.36346544  | 0.25692378  |

|               |            |             |              |             |            |
|---------------|------------|-------------|--------------|-------------|------------|
| O 1.05196261  | 2.07363007 | -1.92998401 | O 1.02155187 | 3.59150360  | 0.26939730 |
| O -1.23517651 | 4.32312346 | 1.43058122  | O 1.34698359 | -0.65007847 | 1.53109310 |
| C -2.41384575 | 4.62735176 | 2.15530374  | H 0.75308488 | -0.99991422 | 2.20974222 |
| H -2.09319092 | 5.20455245 | 3.01950346  | C 1.57230531 | 2.72015475  | 1.18997203 |
| H -2.91078769 | 3.71260149 | 2.49100005  | H 1.09605841 | 1.75136825  | 1.29348757 |
| H -3.10249913 | 5.22276291 | 1.55011358  | C 2.23963439 | 3.42598582  | 2.30780042 |
| C 1.11513892  | 1.17228226 | -3.02223800 | H 2.78811825 | 2.71188361  | 2.92220429 |
| H 2.17538876  | 1.03062947 | -3.22045896 | H 2.94634812 | 4.16428301  | 1.90793871 |
| H 0.61977065  | 1.59033152 | -3.90335257 | O 1.29172676 | 4.07510733  | 3.15790521 |
| H 0.65526760  | 0.21372151 | -2.75951841 | H 0.60876885 | 4.44329416  | 2.58376462 |

**$\beta$ -O-4 topC<sub>α</sub>-C<sub>Ph</sub> α-side**

|               |             |             |               |             |             |
|---------------|-------------|-------------|---------------|-------------|-------------|
| O -1.85880970 | 0.60694989  | -1.77639271 | H -3.35322443 | 2.15979318  | -2.46558753 |
| C -1.25581692 | 1.74565385  | -1.29500307 | C 1.65887819  | 2.83448406  | 0.86416647  |
| C -0.14908726 | 4.11432232  | -0.37542237 | H 1.78028840  | 3.78142432  | 1.40921095  |
| C -1.81852405 | 2.97015327  | -1.68282066 | C 2.88453178  | 2.62966684  | -0.05685693 |
| C -0.15771950 | 1.71310529  | -0.45263254 | H 2.60490717  | 1.95798100  | -0.87179143 |
| C 0.41323736  | 2.90280144  | 0.00943045  | C 3.39322738  | 3.93994820  | -0.62367507 |
| C -1.25926500 | 4.15195667  | -1.21494022 | H 2.55737388  | 4.49704643  | -1.05222298 |
| H 0.27326505  | 5.04474569  | -0.00992308 | H 3.81310030  | 4.52742054  | 0.20490353  |
| H 0.24708168  | 0.75527254  | -0.13722122 | O 4.34425070  | 3.75352029  | -1.64479743 |
| H -1.71128305 | 5.09035962  | -1.51192296 | H 4.87476907  | 2.98324829  | -1.41043618 |
| C -1.03558083 | -0.15414922 | -2.64855146 | O 4.00036050  | 2.03732173  | 0.65851104  |
| H -1.64752751 | -0.97438218 | -3.02030738 | C 4.05012564  | 0.67079161  | 0.57317480  |
| H -0.17588624 | -0.56782960 | -2.11237915 | C 3.71036025  | -2.08796694 | 0.34249354  |
| H -0.68626553 | 0.46343501  | -3.48213503 | C 4.25838160  | 0.03593568  | -0.65845607 |
| O -2.89757491 | 3.01558264  | -2.49686107 | C 3.85669394  | -0.11372232 | 1.70706560  |

|               |             |             |               |             |             |
|---------------|-------------|-------------|---------------|-------------|-------------|
| C 3.68093249  | -1.48699270 | 1.59650187  | H -0.66937036 | -3.91141396 | -1.58943289 |
| C 4.06649334  | -1.33694823 | -0.77620030 | H 1.46191200  | -5.57718847 | -0.07253945 |
| H 3.44380865  | -2.04530725 | 2.49531883  | H 1.03123166  | -5.33876735 | 1.64072880  |
| H 4.15673601  | -1.83384338 | -1.73206012 | C -1.49015015 | -2.55000736 | -0.17307171 |
| O 4.58452692  | 0.86060347  | -1.68490194 | C -3.56258706 | -0.88990390 | 0.68732112  |
| O 3.70838631  | 0.49283035  | 2.92996076  | C -2.69342353 | -2.53249205 | -0.86737671 |
| C 4.54290978  | 0.34110153  | -3.00284307 | C -1.30117057 | -1.71248463 | 0.92453963  |
| H 4.73567739  | 1.18576998  | -3.66021670 | C -2.33883278 | -0.89280742 | 1.36773857  |
| H 3.55549488  | -0.07709190 | -3.22096176 | C -3.71714429 | -1.68394258 | -0.44784545 |
| H 5.30896091  | -0.42516775 | -3.14683119 | H -2.82418585 | -3.18248497 | -1.72270059 |
| C 4.90921600  | 1.08835643  | 3.43107777  | H -0.35944998 | -1.72387656 | 1.45717686  |
| H 4.65543566  | 1.52408348  | 4.39532788  | O -4.91671646 | -1.55223003 | -1.08770803 |
| H 5.67579616  | 0.32087802  | 3.56239888  | O -2.27222086 | -0.08920548 | 2.45045354  |
| H 5.26522201  | 1.86407202  | 2.75055154  | C -1.02916317 | 0.00390631  | 3.13078905  |
| C 3.17853474  | -3.50352237 | 0.15722679  | H -1.18732345 | 0.71846631  | 3.93513097  |
| C 1.71010614  | -3.52383685 | 0.59007652  | H -0.24416929 | 0.37514657  | 2.46751250  |
| C 1.01259323  | -2.90959156 | -0.63312077 | H -0.74928714 | -0.96465335 | 3.55655142  |
| C 1.90812891  | -3.40553115 | -1.78716675 | C -5.12458380 | -2.32242755 | -2.25737622 |
| O 3.13577954  | -3.86756806 | -1.21348144 | H -6.11940110 | -2.06521617 | -2.61357797 |
| H 3.79662644  | -4.24265585 | 0.67313473  | H -5.08271477 | -3.39108514 | -2.03158360 |
| H 1.53297530  | -2.95983377 | 1.50470569  | H -4.38485168 | -2.07583331 | -3.02507711 |
| H 0.99660647  | -1.82049954 | -0.59001397 | O -4.65378786 | -0.20136113 | 1.13486577  |
| H 2.11382186  | -2.60797929 | -2.50755162 | O 1.49881113  | 1.76744025  | 1.77147012  |
| H 1.45981072  | -4.24740288 | -2.32085465 | H 2.30219945  | 1.65009906  | 2.29698456  |
| C -0.40381506 | -3.51153861 | -0.60305862 | C -4.60734811 | 1.23855770  | 1.22015677  |
| O -0.33775634 | -4.60527264 | 0.32320154  | H -3.84204932 | 1.54282638  | 1.93773211  |
| C 1.01669924  | -4.88202063 | 0.65119957  | C -5.98928420 | 1.59601815  | 1.76658194  |

|               |            |            |               |            |             |
|---------------|------------|------------|---------------|------------|-------------|
| H -6.04869625 | 2.67566853 | 1.91150941 | C -4.32241716 | 1.84083925 | -0.10934324 |
| H -6.74596406 | 1.29865605 | 1.02939423 | H -4.09367386 | 2.89571622 | -0.18256868 |
| O -6.22409787 | 0.99114805 | 3.01743977 | O -4.93171034 | 1.33649600 | -1.21734426 |
| H -6.01634532 | 0.05619180 | 2.91684405 | H -5.10777708 | 0.38789373 | -1.09322024 |

**$\beta$ -O-4 topC<sub>g</sub>-C<sub>ph</sub> phenyl-side**

|               |             |             |               |             |             |
|---------------|-------------|-------------|---------------|-------------|-------------|
| C -1.27967380 | -1.71939174 | 0.00002217  | H -2.64251411 | 1.35037734  | 0.00000792  |
| C -0.56516764 | 0.90282986  | -0.00003431 | O 1.70204737  | 0.39152170  | 0.00004673  |
| C 0.07043354  | -1.44050898 | -0.00012724 | O -0.20603160 | 2.21240946  | -0.00002143 |
| C -2.28585483 | -0.79249302 | 0.00008199  | H 0.75721473  | 2.25889581  | -0.00003109 |
| C -1.90522419 | 0.55644688  | 0.00000071  | C 2.75833254  | -0.54885319 | 0.00006905  |
| C 0.42685838  | -0.09391666 | -0.00007517 | H 3.68028774  | 0.02748993  | 0.00002488  |
| H 0.81442954  | -2.22683276 | -0.00025732 | H 2.71814233  | -1.17721963 | 0.89443211  |
| H -3.33204892 | -1.07152080 | 0.00023003  | H 2.71813849  | -1.17731813 | -0.89423201 |

**$\beta$ -O-4 topC<sub>g</sub>-O  $\beta$ -side**

|               |             |             |               |             |             |
|---------------|-------------|-------------|---------------|-------------|-------------|
| C -2.30980850 | 0.81872639  | 0.20553722  | C -0.24780296 | -0.57151195 | -0.24413912 |
| H -1.87259652 | 1.14328439  | 1.14491596  | C 2.50887102  | -0.89658882 | 0.10219522  |
| C -3.71341711 | 1.21040910  | -0.12213855 | C 0.59022723  | 0.55028272  | -0.18565383 |
| H -3.93458790 | 2.21624246  | 0.23570496  | C 0.30761319  | -1.83955547 | -0.13815369 |
| H -3.85915746 | 1.19502950  | -1.21038437 | C 1.68171761  | -2.00150001 | 0.03934484  |
| O -4.66210110 | 0.35278729  | 0.51053646  | C 1.95530214  | 0.38887037  | -0.01692759 |
| H -4.42688969 | -0.54943535 | 0.26510004  | H 0.16270010  | 1.54137381  | -0.27747237 |
| C -1.73570501 | -0.38492055 | -0.47336052 | H -0.32965051 | -2.71205243 | -0.20786187 |
| H -1.92713081 | -0.30909190 | -1.55050403 | H 2.12656584  | -2.98499085 | 0.12688091  |
| O -2.48670089 | -1.55286126 | -0.09125734 | O 2.87399024  | 1.39607811  | 0.05660235  |
| H -2.27443942 | -1.74252966 | 0.83056666  | O 3.84393394  | -1.04858101 | 0.27600352  |

H 4.24656291 -0.17206281 0.28829450  
C 2.40284837 2.72395448 -0.06374520  
H 3.27721928 3.36564610 0.01298212

H 1.91803178 2.87806728 -1.03200800  
H 1.70131899 2.96213687 0.74095304

**β-O-4 topC<sub>β</sub>-O<sub>β</sub>-side**

O 4.95699159 2.62062819 -0.88140535  
C 4.76653199 1.43412155 -0.24360859  
C 4.66193843 -0.95301884 1.16217823  
C 5.94712528 0.86411194 0.25901116  
C 3.54531201 0.79919844 -0.06092043  
C 3.49244010 -0.40926226 0.64267782  
C 5.88913269 -0.32564389 0.96263805  
H 4.62117210 -1.87342236 1.73538551  
H 2.62973046 1.25575580 -0.41732712  
H 6.80797522 -0.73652822 1.36228252  
C 3.80991593 3.26731588 -1.41870702  
H 4.16493619 4.20840952 -1.83237897  
H 3.05528968 3.45252374 -0.65169651  
H 3.37026093 2.65858707 -2.21391590  
O 7.13389617 1.49253235 0.07395819  
H 6.96059306 2.30840085 -0.41181987  
C 2.17567683 -1.12980435 0.85428649  
H 2.19152557 -1.59700602 1.84583817  
C 1.88656974 -2.25615164 -0.15036960  
H 1.32320854 -1.83242803 -0.98945494  
C 3.07612286 -3.01474830 -0.70768637  
H 3.77008250 -2.32349781 -1.18645123

H 3.60508592 -3.52090217 0.11097440  
O 2.64634009 -3.93802542 -1.68370853  
H 1.81643193 -4.31913475 -1.37164787  
O 1.07673181 -3.27533309 0.47962327  
C -0.25668243 -2.99055440 0.58635624  
C -2.93563325 -2.23811096 0.70566066  
C -1.09047644 -3.17818085 -0.52231043  
C -0.79742215 -2.51899663 1.78006271  
C -2.13545071 -2.14562297 1.83730841  
C -2.43077737 -2.80096753 -0.46533757  
H -2.50795334 -1.71460081 2.76068760  
H -3.08344702 -2.90785699 -1.32135729  
O -0.47260274 -3.68999432 -1.61923191  
O -0.00809727 -2.32539048 2.87784417  
C -1.23372092 -3.81494714 -2.80425440  
H -0.55584721 -4.21401037 -3.55516413  
H -1.61038760 -2.84014204 -3.13153689  
H -2.07340039 -4.50115155 -2.66234867  
C 0.51951500 -3.52277483 3.44678708  
H 1.10356429 -3.21705485 4.31311304  
H -0.29603619 -4.17699187 3.76813377  
H 1.15668080 -4.04625078 2.73187527

|   |             |             |             |   |             |             |             |
|---|-------------|-------------|-------------|---|-------------|-------------|-------------|
| C | -4.26840416 | -1.50611232 | 0.69463156  | C | -2.65922585 | 3.30701857  | 0.19535500  |
| C | -3.95040066 | -0.01185974 | 0.56845855  | C | -1.44593524 | 3.86277582  | 0.57013532  |
| C | -3.76935065 | 0.12311755  | -0.94668378 | C | -0.30645585 | 2.45454521  | -1.12209046 |
| C | -4.86447996 | -0.81317814 | -1.46467415 | H | -1.60129772 | 1.23105044  | -2.29894582 |
| O | -5.05592519 | -1.80722557 | -0.45120382 | H | -3.58786016 | 3.58142486  | 0.67659603  |
| H | -4.85926984 | -1.75166683 | 1.58095103  | O | 0.86542064  | 2.07705768  | -1.64373383 |
| H | -3.04884466 | 0.26333984  | 1.11475181  | O | -1.28841656 | 4.78198245  | 1.52156829  |
| H | -2.78474609 | -0.21003316 | -1.26368574 | C | -2.44432346 | 5.25141964  | 2.19255754  |
| H | -4.58395517 | -1.30843368 | -2.39767457 | H | -2.09435095 | 5.99727922  | 2.90115487  |
| H | -5.80782577 | -0.27951104 | -1.61877141 | H | -2.93990249 | 4.43663433  | 2.72794269  |
| C | -3.99349818 | 1.62007704  | -1.14321726 | H | -3.14425534 | 5.70774222  | 1.48746478  |
| O | -5.03966061 | 1.94613827  | -0.24100889 | C | 0.87259164  | 0.92721197  | -2.47587786 |
| C | -5.08889377 | 0.98242170  | 0.82519803  | H | 1.91978693  | 0.69558422  | -2.66272357 |
| H | -4.33489158 | 1.87927265  | -2.15082980 | H | 0.36557718  | 1.12640356  | -3.42403700 |
| H | -6.06743881 | 0.49389236  | 0.79932455  | H | 0.39920862  | 0.09052358  | -1.95396140 |
| H | -4.97619992 | 1.50314543  | 1.77845448  | O | 0.90977089  | 3.87255818  | 0.32383405  |
| C | -2.69860699 | 2.35151152  | -0.82220873 | O | 1.05741960  | -0.25576308 | 0.74947205  |
| C | -0.18533962 | 3.44150432  | -0.04745222 | H | 1.10273903  | 0.38725339  | 1.46430190  |
| C | -1.53127585 | 1.96026347  | -1.50316488 |   |             |             |             |

**$\beta$ -O-4 topO-C<sub>PhO</sub>-side**

|   |             |             |             |   |             |             |             |
|---|-------------|-------------|-------------|---|-------------|-------------|-------------|
| O | -2.17096352 | 1.34155916  | 0.10560108  | O | -4.55449142 | 0.59546263  | -1.14840456 |
| C | -2.26913064 | 0.08355285  | -0.38135194 | H | -4.45354587 | 1.50213669  | -0.84438090 |
| H | -2.00972191 | 0.04302666  | -1.44952034 | C | -1.48043165 | -0.94007948 | 0.46018219  |
| C | -3.81261521 | -0.23998279 | -0.31417729 | H | -1.83140664 | -1.94523623 | 0.21183827  |
| H | -3.92918882 | -1.25963446 | -0.68262440 | O | -1.78806205 | -0.75356273 | 1.82755653  |
| H | -4.11845080 | -0.18830003 | 0.73350804  | H | -1.61044246 | 0.17036432  | 2.03872467  |

|              |             |             |              |             |             |
|--------------|-------------|-------------|--------------|-------------|-------------|
| C 0.00522494 | -0.87132074 | 0.17278585  | H 2.66335861 | -2.87458548 | -0.55917185 |
| C 2.75919962 | -0.76901547 | -0.29883923 | O 2.81094569 | 1.53501862  | -0.01212625 |
| C 0.67864066 | 0.35820376  | 0.21159262  | O 4.09203945 | -0.71127710 | -0.53030622 |
| C 0.72061730 | -2.02688959 | -0.10396190 | H 4.36985891 | 0.20967151  | -0.45626182 |
| C 2.09455584 | -1.97931861 | -0.34116478 | C 2.16517627 | 2.76614417  | 0.25184067  |
| C 2.04219013 | 0.40790328  | -0.01855680 | H 2.93773470 | 3.52998665  | 0.20989468  |
| H 0.12758255 | 1.26919456  | 0.41633019  | H 1.40062793 | 2.97362205  | -0.50213735 |
| H 0.20883981 | -2.98225710 | -0.13042708 | H 1.70844526 | 2.75922185  | 1.24556694  |

**β-O-4 topO-C<sub>Ph</sub> phenyl-side**

|               |             |             |               |             |             |
|---------------|-------------|-------------|---------------|-------------|-------------|
| O -3.43228931 | 3.67398102  | 0.54626726  | H -2.14813169 | -1.71701775 | -1.11765168 |
| C -3.54241327 | 2.45443712  | -0.04657483 | C -2.35792124 | -1.75375981 | 1.01772265  |
| C -3.99187002 | 0.08712217  | -1.42514385 | H -1.84442364 | -1.26378070 | 1.85250307  |
| C -4.61443104 | 2.36034339  | -0.95303385 | C -3.84390762 | -1.86585089 | 1.31772163  |
| C -2.71053557 | 1.36821468  | 0.16667413  | H -4.26831056 | -0.87443789 | 1.47221749  |
| C -2.93826967 | 0.17322013  | -0.52738635 | H -4.34997440 | -2.32587494 | 0.45691372  |
| C -4.83350162 | 1.17994412  | -1.63807349 | O -4.06395474 | -2.60761999 | 2.49619130  |
| H -4.15728456 | -0.83187363 | -1.97676436 | H -3.50677936 | -3.39138995 | 2.44740920  |
| H -1.85234043 | 1.44466108  | 0.82270477  | O -1.92295501 | -3.14105068 | 0.96830418  |
| H -5.65639662 | 1.13343609  | -2.34048359 | C -0.61542821 | -3.30319504 | 0.60382182  |
| C -2.35560365 | 3.87064038  | 1.44786465  | C 2.00302820  | -3.10276545 | -0.32010377 |
| H -2.43513704 | 4.89804132  | 1.79470218  | C 0.41782108  | -2.95938219 | 1.49249829  |
| H -1.39965987 | 3.72498178  | 0.94002275  | C -0.30043364 | -3.69510730 | -0.69911232 |
| H -2.43799850 | 3.18702289  | 2.29804414  | C 1.01090098  | -3.58786592 | -1.16058877 |
| O -5.41637325 | 3.43221626  | -1.16198682 | C 1.72569582  | -2.85285343 | 1.02451629  |
| H -5.08803148 | 4.15720769  | -0.61578206 | H 1.20765620  | -3.81034719 | -2.20354378 |
| C -2.02549306 | -1.00516840 | -0.29226789 | H 2.52842060  | -2.53047272 | 1.67341083  |



|               |             |             |               |             |             |
|---------------|-------------|-------------|---------------|-------------|-------------|
| O 0.02084489  | -2.65178748 | 2.74748228  | H 4.93198802  | 1.30485070  | -0.41798787 |
| O -1.27215981 | -4.04861196 | -1.58631979 | H 5.04287881  | -1.07310466 | -2.35799343 |
| C 1.00003483  | -2.15812285 | 3.64258724  | H 3.69696295  | -0.78066310 | -3.48647127 |
| H 0.47885400  | -1.96326065 | 4.57654947  | C 2.94943578  | 2.09945013  | -0.52631845 |
| H 1.43912632  | -1.22899490 | 3.26538486  | C 1.04670789  | 3.87799867  | 0.22932380  |
| H 1.78812211  | -2.89753062 | 3.81001776  | C 3.22637365  | 2.99523465  | 0.50492862  |
| C -2.07951579 | -5.16268156 | -1.20365428 | C 1.72585265  | 2.10380321  | -1.19179771 |
| H -2.73134087 | -5.36581592 | -2.05085478 | C 0.73432180  | 3.01455879  | -0.79990439 |
| H -1.44653186 | -6.03325279 | -1.01151398 | C 2.24708576  | 3.91957569  | 0.89774421  |
| H -2.67463444 | -4.93040232 | -0.32035916 | H 4.19378342  | 2.96607215  | 0.99089805  |
| C 3.30775036  | -2.61831753 | -0.92098306 | H 1.55472165  | 1.40425787  | -1.99916017 |
| C 3.08888626  | -1.17732829 | -1.40451266 | O 2.39608506  | 4.83990521  | 1.88245039  |
| C 3.50305903  | -0.33522878 | -0.19066836 | O -0.50026349 | 3.10763518  | -1.33862386 |
| C 4.61665265  | -1.19800707 | 0.41631502  | C -0.83487056 | 2.19831617  | -2.37959511 |
| O 4.35267547  | -2.54935048 | 0.03866076  | H -1.88489774 | 2.37914731  | -2.60393782 |
| H 3.62595253  | -3.28492088 | -1.72835387 | H -0.70979580 | 1.16724736  | -2.04257982 |
| H 2.05510258  | -0.99919837 | -1.70362495 | H -0.22398888 | 2.39364693  | -3.26619690 |
| H 2.68555344  | -0.18713081 | 0.51478049  | C 3.64480716  | 4.88741821  | 2.54195276  |
| H 4.64610901  | -1.14095831 | 1.50732653  | H 3.56795831  | 5.68978982  | 3.27190148  |
| H 5.60023335  | -0.90774056 | 0.03077882  | H 4.45397608  | 5.10966352  | 1.83982829  |
| C 3.95362414  | 1.00571516  | -0.81322335 | H 3.85614670  | 3.94555522  | 3.05785008  |
| O 4.07494081  | 0.76616678  | -2.21493231 | O -0.69558450 | -0.48293632 | -0.28130156 |
| C 4.04252834  | -0.63117093 | -2.46361203 | H -0.06784560 | -1.21091683 | -0.23221886 |

S.4.Optimized geometries of the radical species produced from the RSSRRSSR stereoisomer of MC2

4-O-5C<sub>2</sub>-OC<sub>2</sub>-side

|               |             |             |               |             |             |
|---------------|-------------|-------------|---------------|-------------|-------------|
| C 3.86666386  | -0.75107923 | 1.67601687  | H -0.50517190 | 0.17488673  | 1.71442804  |
| C 4.18579296  | 1.05296733  | -0.44619127 | H -0.70940127 | -0.90545945 | -1.81716437 |
| C 3.09236477  | -0.87272463 | 0.51862022  | C -2.33737894 | -0.52592750 | -0.47445304 |
| C 4.79913870  | 0.28068786  | 1.78435167  | C -5.04610745 | 0.04497078  | -0.07285711 |
| C 4.91950326  | 1.13936881  | 0.72020437  | C -3.30447231 | -1.50873185 | -0.65093909 |
| C 3.24629806  | 0.02017856  | -0.53483267 | C -2.73334088 | 0.76150443  | -0.10228842 |
| H 5.41088272  | 0.39067033  | 2.67247505  | C -4.07564974 | 1.04215657  | 0.10156436  |
| H 2.63957901  | -0.07093142 | -1.42754355 | C -4.65457223 | -1.22580211 | -0.45430193 |
| H 3.74612199  | -1.46042823 | 2.48823409  | H -3.01539502 | -2.50924483 | -0.95526541 |
| C 2.03246559  | -1.93928085 | 0.45793203  | H -1.97460173 | 1.52438792  | 0.01186325  |
| O 1.79112090  | -2.32244220 | -0.88455357 | H -5.41741674 | -1.98228281 | -0.59119595 |
| C 0.53579378  | -2.97094732 | -0.88517560 | O 4.31460796  | 1.89719094  | -1.49407329 |
| C -0.35419636 | -2.09168109 | -0.00812055 | O -4.58617609 | 2.25417186  | 0.47307745  |
| C 0.64031090  | -1.53020598 | 1.04264064  | O -6.35811301 | 0.32583616  | 0.12866098  |
| H 2.38409840  | -2.81891270 | 1.01637124  | C -3.67411184 | 3.32200547  | 0.64159611  |
| H 0.19783100  | -3.05758774 | -1.91826493 | H -3.13884282 | 3.52699449  | -0.28968899 |
| H 0.62916010  | -3.97791147 | -0.45407932 | H -4.26833133 | 4.18864054  | 0.92148815  |
| H -1.17465018 | -2.65004776 | 0.44032663  | H -2.95490560 | 3.09776358  | 1.43455171  |
| H 0.50439331  | -1.96246103 | 2.03413743  | C 5.28142605  | 2.92060580  | -1.33900767 |
| C 0.33234460  | -0.03649103 | 1.03543466  | H 5.25994092  | 3.50313475  | -2.25705145 |
| O -0.03498434 | 0.24609399  | -0.30465707 | H 6.27806098  | 2.49368619  | -1.19177615 |
| C -0.86703134 | -0.81952345 | -0.73777387 | H 5.03569082  | 3.56033306  | -0.48591448 |
| H 1.17761210  | 0.60023047  | 1.29526395  | H -6.42774713 | 1.25542995  | 0.37665078  |

**4-O-5C<sub>4</sub>-OO-side**

|               |            |            |               |             |             |
|---------------|------------|------------|---------------|-------------|-------------|
| O -4.11085138 | 2.93153970 | 1.08236810 | C -3.57530372 | -0.90686346 | -0.08493656 |
| C -3.88093344 | 1.75254558 | 0.76037563 | C -4.92002355 | 1.06113558  | -0.00332812 |

|               |             |             |               |             |             |
|---------------|-------------|-------------|---------------|-------------|-------------|
| C -2.67442558 | 1.02471164  | 1.06383961  | C 5.24999437  | 1.28219533  | -0.78899129 |
| C -2.52396193 | -0.25922357 | 0.63296061  | C 3.86350394  | -0.50632618 | 0.07514663  |
| C -4.76047455 | -0.27132493 | -0.39984632 | C 3.21533742  | 0.68048823  | -1.91872742 |
| H -3.46648894 | -1.93854005 | -0.40288444 | C 4.35559276  | 1.47538357  | -1.82698261 |
| H -1.91130293 | 1.52247509  | 1.64787851  | C 5.00025669  | 0.28276357  | 0.16346018  |
| C -1.26404214 | -1.05520527 | 0.93203458  | H 3.65653286  | -1.28369400 | 0.79811792  |
| O -0.28933233 | -0.29201969 | 1.60451690  | H 2.52288302  | 0.83375852  | -2.73998604 |
| C 0.48610638  | 0.41524440  | 0.63421025  | H 4.56837794  | 2.24741834  | -2.55589832 |
| C 0.39859582  | -0.37757082 | -0.68502685 | O -5.70114793 | -0.92676847 | -1.13391159 |
| C -0.55680028 | -1.54324903 | -0.34058139 | O -6.00339111 | 1.76456446  | -0.30036240 |
| H -1.53017929 | -1.88901811 | 1.59013511  | O 5.95904378  | 0.18729552  | 1.13124301  |
| H 0.09204106  | 1.42708111  | 0.50277302  | O 6.36437884  | 2.04904217  | -0.69569242 |
| H 1.50266156  | 0.48152782  | 1.02120252  | C 5.77289272  | -0.78739643 | 2.13999536  |
| C 0.41244344  | -2.72587656 | -0.09916725 | H 5.74230114  | -1.79172481 | 1.70859118  |
| O 1.72947799  | -2.20331478 | -0.15661929 | H 4.85004097  | -0.59943009 | 2.69596590  |
| C 1.69651046  | -1.11603219 | -1.06178115 | H 6.62697205  | -0.70109699 | 2.80742152  |
| H 0.28597420  | -3.48897950 | -0.87619486 | C -6.97268365 | -1.07522401 | -0.50228710 |
| H 0.28363662  | -3.18926930 | 0.87990093  | H -6.85853191 | -1.59408156 | 0.45395453  |
| H 1.58802533  | -1.49856260 | -2.08912778 | H -7.57433537 | -1.68066482 | -1.17654217 |
| H 0.03693802  | 0.24397239  | -1.50376328 | H -7.45147618 | -0.10794070 | -0.34737471 |
| H -1.25660716 | -1.76499727 | -1.14544697 | H -5.85325252 | 2.64865561  | 0.08781126  |
| C 2.96153807  | -0.30444140 | -0.97265545 | H 6.85562731  | 1.76599558  | 0.08485963  |

**4-O-5O-C<sub>5</sub>O-side**

|              |             |             |              |             |             |
|--------------|-------------|-------------|--------------|-------------|-------------|
| C 3.48079149 | -0.83813154 | 1.72776798  | C 4.42016580 | 0.14158608  | 1.81129720  |
| C 4.02980858 | 0.70303476  | -0.56251834 | C 4.76006348 | 0.97916083  | 0.67798319  |
| C 2.78360834 | -1.06729975 | 0.50808656  | C 3.06242442 | -0.30620841 | -0.60721375 |

|               |             |             |               |             |             |
|---------------|-------------|-------------|---------------|-------------|-------------|
| H 4.96882989  | 0.34082445  | 2.72393621  | C -5.28016565 | 0.20617350  | -0.07517743 |
| H 2.52737907  | -0.47413413 | -1.53277524 | C -3.61540908 | -1.44035825 | -0.62123068 |
| O 5.62307269  | 1.87275001  | 0.76580125  | C -2.93565031 | 0.81085906  | -0.11866240 |
| H 3.25269491  | -1.45623239 | 2.59062389  | C -4.26299060 | 1.15930837  | 0.07944009  |
| C 1.69325129  | -2.09676900 | 0.49063132  | C -4.95020299 | -1.08937033 | -0.43085847 |
| O 1.42371046  | -2.51637612 | -0.83185597 | H -3.37472318 | -2.45963503 | -0.90497663 |
| C 0.13637673  | -3.10130239 | -0.80352392 | H -2.14215640 | 1.53978702  | -0.02015711 |
| C -0.70033834 | -2.14902139 | 0.04805409  | H -5.74842991 | -1.81103386 | -0.55290574 |
| C 0.32546636  | -1.60807249 | 1.07923176  | O 4.21510628  | 1.36562394  | -1.69972104 |
| H 2.02048934  | -2.96648075 | 1.08015277  | O -4.71475550 | 2.40083947  | 0.42663364  |
| H -0.21209349 | -3.20408708 | -1.83140923 | O -6.57664237 | 0.55307002  | 0.12009926  |
| H 0.18331455  | -4.09681182 | -0.34039412 | C -3.75323538 | 3.42740041  | 0.57734882  |
| H -1.54681907 | -2.64835402 | 0.51725982  | H -3.20896809 | 3.59063680  | -0.35695049 |
| H 0.17728838  | -2.00908207 | 2.08182928  | H -4.30603873 | 4.32574011  | 0.84147250  |
| C 0.08803129  | -0.10157461 | 1.03149695  | H -3.04578687 | 3.18346423  | 1.37503691  |
| O -0.26336613 | 0.16009093  | -0.31582697 | C 5.14738513  | 2.44225835  | -1.83818895 |
| C -1.14892142 | -0.87395559 | -0.71915306 | H 5.04139441  | 2.75818112  | -2.87356597 |
| H 0.95967387  | 0.50486784  | 1.27679007  | H 6.16267463  | 2.10443949  | -1.63869221 |
| H -0.73881819 | 0.16538850  | 1.70374669  | H 4.90313653  | 3.25647006  | -1.15827997 |
| H -0.99566685 | -0.99900261 | -1.79522945 | H -6.60247035 | 1.48942951  | 0.35068453  |
| C -2.60244385 | -0.50144448 | -0.46435060 |               |             |             |

**4-O-5O-C<sub>5</sub>C<sub>5</sub>-side**

|               |             |             |               |             |             |
|---------------|-------------|-------------|---------------|-------------|-------------|
| C -3.97611135 | 1.57965739  | 1.38125838  | C -2.68339180 | -0.26614933 | 0.67513939  |
| C -3.71877035 | -0.58349695 | -0.20544384 | C -4.87331401 | 0.18610504  | -0.29471181 |
| C -5.01102590 | 1.32641371  | 0.51620680  | H -3.65965695 | -1.44996579 | -0.85487243 |
| C -2.82440878 | 0.84794943  | 1.50893613  | H -2.04994450 | 1.09497919  | 2.22534140  |

|               |             |             |               |             |             |
|---------------|-------------|-------------|---------------|-------------|-------------|
| C -1.44321582 | -1.14545472 | 0.77652976  | C 4.16580793  | 1.78830996  | -1.54160283 |
| O -0.42706873 | -0.54168315 | 1.55166104  | C 4.79777982  | 0.26551324  | 0.21346195  |
| C 0.28972342  | 0.35730894  | 0.70586962  | H 3.43972986  | -1.37571277 | 0.56865231  |
| C 0.19386686  | -0.20117575 | -0.72801544 | H 2.33026256  | 1.32712658  | -2.55291647 |
| C -0.77036074 | -1.40212429 | -0.57828585 | H 4.38611154  | 2.67244707  | -2.12682530 |
| H -1.71027328 | -2.07892617 | 1.28085402  | O -5.82540896 | -0.14300681 | -1.21420039 |
| H -0.15613530 | 1.35585647  | 0.75615304  | O -6.12411359 | 2.10087368  | 0.39053201  |
| H 1.31243457  | 0.40718624  | 1.07858067  | O 5.75423001  | -0.00395907 | 1.15080872  |
| C 0.18757570  | -2.61718500 | -0.57273121 | O 6.17683467  | 2.14348492  | -0.32631853 |
| O 1.51054544  | -2.10603848 | -0.54099822 | C 5.56254190  | -1.14281939 | 1.96845380  |
| C 1.48414626  | -0.87347413 | -1.23461201 | H 5.52461276  | -2.05308513 | 1.36371503  |
| H 0.04911516  | -3.21824206 | -1.47934582 | H 4.64136409  | -1.05217388 | 2.55097070  |
| H 0.06022856  | -3.25654964 | 0.30173900  | H 6.41780209  | -1.18322323 | 2.63879629  |
| H 1.36963485  | -1.06390247 | -2.31373624 | C -7.07760251 | -0.54293734 | -0.66196373 |
| H -0.16704034 | 0.55224519  | -1.42765886 | H -6.94295765 | -1.42195778 | -0.02441463 |
| H -1.48886533 | -1.46910436 | -1.39319783 | H -7.71414316 | -0.79831700 | -1.50670940 |
| C 2.75669237  | -0.10172192 | -1.00793801 | H -7.53109704 | 0.26750751  | -0.08981495 |
| C 5.05665173  | 1.41234233  | -0.55181167 | H -6.04827889 | 2.85002068  | 0.98933404  |
| C 3.65514134  | -0.48765951 | -0.01000507 | H 6.66615863  | 1.72306463  | 0.39092381  |
| C 3.02007172  | 1.02949131  | -1.76997527 |               |             |             |

### **β-β' Cleavage**

|              |            |             |              |            |             |
|--------------|------------|-------------|--------------|------------|-------------|
| C 1.57703434 | 3.40225063 | -2.22315188 | C 1.04827563 | 2.91405060 | 0.06882008  |
| C 2.31870124 | 2.38089451 | 0.26081354  | H 3.53666477 | 2.76045411 | -2.87397467 |
| C 0.66163159 | 3.40798794 | -1.17121125 | H 0.35250489 | 2.91116846 | 0.89749683  |
| C 2.83324373 | 2.83516518 | -2.05344728 | O 4.41231971 | 1.64529488 | -0.72102100 |
| C 3.19532193 | 2.29953173 | -0.82726243 | C 4.36062933 | 0.28829653 | -0.45413487 |

|               |             |             |               |             |             |
|---------------|-------------|-------------|---------------|-------------|-------------|
| C 4.45495111  | -2.37441817 | 0.26351210  | C -3.35479110 | 2.18010629  | -0.82625672 |
| C 5.58378334  | -0.26945177 | -0.08519803 | C -1.34017583 | 3.37454786  | -2.66076508 |
| C 3.20218928  | -0.46816563 | -0.49269058 | H -0.70934706 | 5.02479144  | -1.49612429 |
| C 3.23907907  | -1.79932011 | -0.09324821 | H -3.32460866 | 3.73878451  | 0.62673943  |
| C 5.62779375  | -1.62456784 | 0.25369142  | H -3.28273053 | 4.30686861  | -1.04233003 |
| H 4.52084572  | -3.41043422 | 0.57917773  | H -4.37367835 | 2.08625671  | -1.18007601 |
| H 2.27021292  | -0.01728765 | -0.80376355 | H -1.56376956 | 4.03870116  | -3.48649212 |
| C 1.93284503  | -2.54995099 | 0.09510842  | C -1.45866351 | 1.89810124  | -2.86248240 |
| O 0.86764052  | -1.94972555 | -0.62838205 | O -1.26627891 | 1.19679493  | -1.65322862 |
| C 0.16033123  | -1.01899203 | 0.21309378  | C -2.44229536 | 0.99498341  | -0.85298144 |
| C 0.80097352  | -1.09295022 | 1.60646395  | H -0.67680055 | 1.54272314  | -3.54769984 |
| C 1.49193015  | -2.45961734 | 1.56233861  | H -2.42382737 | 1.63948653  | -3.32320558 |
| H 2.03146500  | -3.58329990 | -0.25180373 | H -2.02339921 | 0.85238134  | 0.15284401  |
| H 0.20651766  | -0.01870523 | -0.22545372 | C -3.14027452 | -0.29334605 | -1.27201203 |
| H -0.88627193 | -1.33462140 | 0.24654789  | C -4.31603518 | -2.74683340 | -1.93970897 |
| C 0.34142875  | -3.40738917 | 1.95736434  | C -4.46299415 | -0.56000693 | -0.94035139 |
| O -0.68509479 | -2.61253144 | 2.55788127  | C -2.39728127 | -1.27300556 | -1.94460450 |
| C -0.22975936 | -1.27513057 | 2.71587123  | C -2.97535276 | -2.48897702 | -2.26738357 |
| H 0.66849444  | -4.17024742 | 2.66821696  | C -5.05116119 | -1.77999736 | -1.28070112 |
| H -0.08833355 | -3.90002030 | 1.08002698  | H -5.04875018 | 0.16771484  | -0.39111855 |
| H 0.26952943  | -1.17358984 | 3.69029818  | H -1.36254421 | -1.07040252 | -2.18822932 |
| H 1.48492952  | -0.26423473 | 1.79019227  | H -6.08460516 | -1.99482616 | -1.03511647 |
| H 2.33643489  | -2.53327063 | 2.24754727  | C -1.37757831 | -0.29527061 | 2.64704435  |
| H 1.29498514  | 3.79838748  | -3.19255116 | C -3.44868581 | 1.56533525  | 2.47235277  |
| C -0.75371847 | 3.93158031  | -1.39506432 | C -2.69111935 | -0.73556734 | 2.47536800  |
| O -1.50013043 | 3.63285698  | -0.21543501 | C -1.11114773 | 1.06845302  | 2.72714817  |
| C -2.90263673 | 3.52870833  | -0.36336312 | C -2.14397165 | 1.99941924  | 2.63590491  |

|               |             |             |               |             |             |
|---------------|-------------|-------------|---------------|-------------|-------------|
| C -3.72073284 | 0.19221883  | 2.39413528  | C -0.97207816 | -3.35142751 | -3.21050591 |
| H -2.87941997 | -1.79824533 | 2.40531405  | H -0.39271623 | -3.12832039 | -2.31060740 |
| H -0.08852049 | 1.41231351  | 2.84970744  | H -0.64558120 | -4.29172538 | -3.64902014 |
| H -1.94832124 | 3.06437282  | 2.68149111  | H -0.83913021 | -2.54418555 | -3.93691024 |
| O 6.79641137  | -2.20498389 | 0.65475740  | C 7.79574419  | -2.29048153 | -0.35740539 |
| O 6.70801512  | 0.49337868  | -0.01877521 | H 7.42546559  | -2.87959671 | -1.20198858 |
| O 2.60751752  | 1.87355375  | 1.49326237  | H 8.64566583  | -2.79694952 | 0.09591534  |
| O -2.34831941 | -3.52000099 | -2.90271684 | H 8.09608080  | -1.29839804 | -0.69771951 |
| O -4.87909590 | -3.93797657 | -2.26587747 | C 3.88323399  | 2.17818080  | 2.05637429  |
| O -5.04516520 | -0.10581740 | 2.24254871  | H 3.73474929  | 2.24363197  | 3.13336175  |
| O -4.46597259 | 2.46532651  | 2.37899273  | H 4.25102102  | 3.13517711  | 1.67950702  |
| C -5.40738486 | -1.47676156 | 2.27504671  | H 4.60605813  | 1.38943788  | 1.83866351  |
| H -5.12042082 | -1.92507955 | 3.23037191  | H 6.47147183  | 1.39041801  | -0.28472530 |
| H -4.93820677 | -2.02055071 | 1.45158448  | H -5.29001942 | 1.96886904  | 2.30157029  |
| H -6.48923536 | -1.50651678 | 2.16383302  | H -4.20533304 | -4.46988776 | -2.70667625 |

**$\beta$ - $\beta'$  bottom $C_{\alpha}$ - $C_{\beta}$**

|              |            |             |              |             |             |
|--------------|------------|-------------|--------------|-------------|-------------|
| C 1.81866875 | 3.74025549 | -1.79966606 | C 4.44181518 | -2.43107088 | -0.03610882 |
| C 2.49954609 | 2.33256041 | 0.52407544  | C 5.65813635 | -0.34995856 | -0.14931648 |
| C 0.86393119 | 3.58934238 | -0.76564869 | C 3.27164349 | -0.40216199 | -0.57600084 |
| C 3.04888192 | 3.12161435 | -1.70103062 | C 3.25194090 | -1.76930800 | -0.32567136 |
| C 3.38543668 | 2.38836553 | -0.56500478 | C 5.64485262 | -1.73509360 | 0.03588110  |
| C 1.24574004 | 2.90208793 | 0.40880308  | H 4.46316894 | -3.49760837 | 0.16247679  |
| H 3.76255140 | 3.15574683 | -2.51554814 | H 2.36052784 | 0.11922841  | -0.83509913 |
| H 0.54979255 | 2.80543842 | 1.23156789  | C 1.91808459 | -2.48685768 | -0.22145992 |
| O 4.57135541 | 1.67197925 | -0.56055885 | O 0.87168672 | -1.76759273 | -0.85766778 |
| C 4.46109710 | 0.29660156 | -0.45274175 | C 0.21072760 | -0.91246222 | 0.09327772  |

|               |             |             |               |             |             |
|---------------|-------------|-------------|---------------|-------------|-------------|
| C 0.83017981  | -1.19759937 | 1.46873507  | H -0.55465855 | 2.38926366  | -3.34580795 |
| C 1.48102670  | -2.56752082 | 1.24826179  | H -1.69643889 | 1.09117298  | -3.76549531 |
| H 1.97818302  | -3.47260766 | -0.69413877 | H -2.02084689 | 1.20698573  | 0.06651066  |
| H 0.31517108  | 0.13056514  | -0.21385057 | C -3.16658791 | -0.01850615 | -1.28046211 |
| H -0.85183585 | -1.16870537 | 0.08450605  | C -4.57266075 | -2.40052672 | -1.70260618 |
| C 0.30531586  | -3.52573667 | 1.51723140  | C -4.49858616 | -0.13117184 | -0.90358278 |
| O -0.69248051 | -2.79502275 | 2.23311688  | C -2.53209467 | -1.11307833 | -1.88012174 |
| C -0.22279062 | -1.48668006 | 2.53579859  | C -3.22415962 | -2.29664399 | -2.07783501 |
| H 0.61059089  | -4.39205172 | 2.10913875  | C -5.20320822 | -1.31470545 | -1.12314973 |
| H -0.14244140 | -3.87633541 | 0.58160803  | H -5.00231246 | 0.69025075  | -0.40690755 |
| H 0.25557758  | -1.49422528 | 3.52549612  | H -1.48955582 | -1.02555366 | -2.15992041 |
| H 1.53916530  | -0.42498668 | 1.76650125  | H -6.24414136 | -1.41140750 | -0.83785135 |
| H 2.32231264  | -2.75356946 | 1.91581885  | C -1.36492965 | -0.49558479 | 2.54299184  |
| H 1.55887012  | 4.29184227  | -2.69618104 | C -3.42899637 | 1.37766471  | 2.46085010  |
| C -0.45793336 | 4.04257225  | -0.92309881 | C -2.68236890 | -0.92279941 | 2.36991735  |
| O -1.36029507 | 3.72730420  | 0.02318445  | C -1.09320326 | 0.86103369  | 2.69223398  |
| C -2.73169625 | 3.69920326  | -0.36234249 | C -2.12294639 | 1.79928269  | 2.64585164  |
| C -3.07633257 | 2.54849558  | -1.32813189 | C -3.71028871 | 0.00936780  | 2.34471949  |
| C -2.62056636 | 2.75093166  | -2.74090595 | H -2.87550991 | -1.97985838 | 2.24936695  |
| H -0.80396903 | 4.57472105  | -1.80330206 | H -0.06882962 | 1.19295885  | 2.83027737  |
| H -3.28140512 | 3.56950030  | 0.57078215  | H -1.92280921 | 2.86080864  | 2.73485082  |
| H -3.00597751 | 4.66152686  | -0.81116516 | O 6.78670526  | -2.40535546 | 0.36919287  |
| H -4.16285457 | 2.43381016  | -1.28193811 | O 6.81232437  | 0.35363163  | 0.00353937  |
| H -3.15334027 | 3.31586681  | -3.49181696 | O 2.78058077  | 1.65278911  | 1.67334456  |
| C -1.45600610 | 1.85996600  | -3.01418426 | O -2.70543840 | -3.43371165 | -2.62405899 |
| O -1.15759391 | 1.26056977  | -1.76033345 | O -5.24747087 | -3.56235395 | -1.89970790 |
| C -2.34826140 | 1.22782378  | -0.97744422 | O -5.03751189 | -0.28067788 | 2.21100977  |



|               |             |             |               |             |             |
|---------------|-------------|-------------|---------------|-------------|-------------|
| O -4.44180222 | 2.28769640  | 2.37998591  | H 7.39822704  | -2.88554255 | -1.55278427 |
| C -5.40494228 | -1.65043586 | 2.24164558  | H 8.61251356  | -3.00715972 | -0.25247789 |
| H -5.08747526 | -2.10896727 | 3.18239703  | H 8.13209280  | -1.40412165 | -0.86675974 |
| H -4.96751142 | -2.18838914 | 1.39731154  | C 4.05774536  | 1.86816082  | 2.27266387  |
| H -6.48985751 | -1.67487339 | 2.16568411  | H 3.90890007  | 1.79179242  | 3.34895266  |
| C -1.32502874 | -3.41976007 | -2.95659580 | H 4.43530846  | 2.86301667  | 2.02604385  |
| H -0.71214694 | -3.16258303 | -2.08793255 | H 4.77343898  | 1.10826043  | 1.95262282  |
| H -1.08964775 | -4.42290024 | -3.30484981 | H 6.61254757  | 1.28393772  | -0.15840110 |
| H -1.12979335 | -2.69927427 | -3.75614027 | H -5.27210662 | 1.79668844  | 2.34151875  |
| C 7.78774785  | -2.41523271 | -0.64470722 | H -4.63753044 | -4.19131787 | -2.30416217 |

**$\beta$ - $\beta'$  bottom $C_g$ -O**

|              |             |             |               |             |             |
|--------------|-------------|-------------|---------------|-------------|-------------|
| C 2.38353686 | 4.24100047  | -1.18566788 | H 4.51025497  | -3.56387388 | -0.42592532 |
| C 2.33177766 | 2.09826847  | 0.58655310  | H 2.59558204  | 0.22427160  | -1.10388551 |
| C 1.15207814 | 3.85179534  | -0.62201585 | C 2.07300776  | -2.44166360 | -1.11322097 |
| C 3.53279553 | 3.49790895  | -0.96764844 | O 1.06941349  | -1.53032972 | -1.52222696 |
| C 3.50620675 | 2.39862692  | -0.11935128 | C 0.44196907  | -0.97264266 | -0.35570575 |
| C 1.16466291 | 2.78023053  | 0.28424066  | C 0.83945226  | -1.85188638 | 0.84231957  |
| H 4.46052277 | 3.73236591  | -1.47545522 | C 1.50090608  | -3.06490094 | 0.16950988  |
| H 0.26797839 | 2.49003745  | 0.81287311  | H 2.20220505  | -3.17073463 | -1.91838926 |
| O 4.65177939 | 1.63517003  | 0.00183577  | H 0.73505883  | 0.06964069  | -0.22226856 |
| C 4.55522011 | 0.27311095  | -0.23271812 | H -0.63429611 | -1.00732121 | -0.51814094 |
| C 4.50824390 | -2.47898225 | -0.40612123 | C 0.30521513  | -4.02500207 | -0.03226785 |
| C 5.67311450 | -0.44930260 | 0.17980356  | O -0.84813542 | -3.39681862 | 0.52838699  |
| C 3.43972773 | -0.35653937 | -0.76114285 | C -0.39025247 | -2.46457890 | 1.50502915  |
| C 3.39025492 | -1.74512849 | -0.79707583 | H 0.48368482  | -4.98018876 | 0.47264508  |
| C 5.65433024 | -1.84193013 | 0.05696498  | H 0.09510237  | -4.21729447 | -1.08684560 |

|               |             |             |               |             |             |
|---------------|-------------|-------------|---------------|-------------|-------------|
| H -0.08420574 | -3.01725985 | 2.40719822  | H -1.72424085 | -0.48752849 | -2.19477726 |
| H 1.50382889  | -1.33118737 | 1.53063060  | H -6.33717580 | 0.10775371  | -0.50984831 |
| H 2.27791274  | -3.51776799 | 0.78426619  | C -1.47362573 | -1.47706097 | 1.86518258  |
| H 2.41601300  | 5.08834268  | -1.86102936 | C -3.45227259 | 0.36147655  | 2.56139117  |
| C -0.05097253 | 4.55866654  | -1.02347411 | C -2.82320285 | -1.82239620 | 1.72616400  |
| O -1.44248837 | 3.56854221  | 1.67006237  | C -1.13090106 | -0.22768057 | 2.36944525  |
| C -2.48669745 | 3.75571830  | 0.80995174  | C -2.12080719 | 0.69113718  | 2.72324254  |
| C -2.32318663 | 3.20357085  | -0.60485839 | C -3.80526597 | -0.91271130 | 2.08591758  |
| C -1.31881175 | 3.93256188  | -1.54591278 | H -3.07810251 | -2.79485443 | 1.32595372  |
| H 0.11771617  | 5.57644117  | -1.36197369 | H -0.08837691 | 0.05915167  | 2.46643926  |
| H -3.34250546 | 3.25950270  | 1.31431153  | H -1.86445386 | 1.67104146  | 3.10949716  |
| H -2.75615605 | 4.82471442  | 0.79465348  | O 6.71339764  | -2.59318994 | 0.47891535  |
| H -3.30160054 | 3.30882332  | -1.08506431 | O 6.74632109  | 0.17530135  | 0.73388151  |
| H -1.86251848 | 4.71911179  | -2.07337142 | O 2.24914862  | 1.09622033  | 1.51065546  |
| C -1.00136080 | 2.76610891  | -2.50353114 | O -3.48464301 | -2.50023230 | -2.72575894 |
| O -0.86063436 | 1.64862526  | -1.64998179 | O -5.95440993 | -2.09076472 | -1.84805367 |
| C -1.90953164 | 1.71278139  | -0.68753966 | O -5.14989005 | -1.12440176 | 2.02738124  |
| H -0.07003536 | 2.88956976  | -3.05597163 | O -4.42535685 | 1.26973174  | 2.84924607  |
| H -1.83191466 | 2.61172623  | -3.20701866 | C -5.59217943 | -2.39486901 | 1.58131902  |
| H -1.47968624 | 1.37646625  | 0.26104187  | H -5.24711474 | -3.17912995 | 2.26142930  |
| C -3.03701771 | 0.76253940  | -1.05387107 | H -5.23947482 | -2.59580620 | 0.56776529  |
| C -5.00728620 | -1.14601736 | -1.59677576 | H -6.67909722 | -2.35599822 | 1.58191336  |
| C -4.33589652 | 0.93268462  | -0.58861800 | C -2.12892281 | -2.89832343 | -2.88734689 |
| C -2.72831133 | -0.37199007 | -1.80982137 | H -1.60987421 | -2.86718820 | -1.92422100 |
| C -3.69511209 | -1.33148372 | -2.05394236 | H -2.15628587 | -3.91625593 | -3.27049011 |
| C -5.32242418 | -0.01236349 | -0.86990098 | H -1.61348817 | -2.25220516 | -3.60215581 |
| H -4.59788363 | 1.79346791  | 0.01736361  | C 7.91082204  | -2.40676955 | -0.27060448 |

|              |             |             |               |             |             |
|--------------|-------------|-------------|---------------|-------------|-------------|
| H 7.74008014 | -2.66110453 | -1.32111854 | H 3.64053097  | 2.05259156  | 2.72586857  |
| H 8.64537017 | -3.08780843 | 0.15487047  | H 4.07678112  | 0.39063742  | 2.22517287  |
| H 8.26940080 | -1.37964169 | -0.18911153 | H 6.56061110  | 1.12213498  | 0.74935091  |
| C 3.25754615 | 1.05075285  | 2.51890586  | H -5.27674398 | 0.83653208  | 2.70757742  |
| H 2.77896020 | 0.65404073  | 3.41398797  | H -5.53935383 | -2.78634919 | -2.37334073 |

**$\beta$ - $\beta'$  bottom $C_{\beta}$ - $C_{\gamma}$**

|              |             |             |               |             |             |
|--------------|-------------|-------------|---------------|-------------|-------------|
| C 2.07909871 | 4.05478378  | -0.91357236 | C 1.02290501  | -1.77371118 | 0.65500405  |
| C 2.52161815 | 2.03235808  | 0.95452828  | C 1.69142900  | -2.99393170 | 0.01093940  |
| C 1.05648177 | 3.67838128  | -0.04294179 | H 2.41839983  | -3.12841305 | -2.06727054 |
| C 3.29929166 | 3.39509248  | -0.88062390 | H 0.75290303  | 0.10522063  | -0.46836206 |
| C 3.51796974 | 2.37287692  | 0.03285690  | H -0.50129930 | -1.10343049 | -0.75727669 |
| C 1.29150380 | 2.68303150  | 0.89483225  | C 0.49715457  | -3.95284513 | -0.18897232 |
| H 4.09273512 | 3.63686082  | -1.57742648 | O -0.61986463 | -3.40562813 | 0.52002277  |
| H 0.51715897 | 2.40333251  | 1.59746404  | C -0.14807103 | -2.39138124 | 1.40759587  |
| O 4.72840798 | 1.69996505  | -0.00577371 | H 0.71853061  | -4.95254075 | 0.19529569  |
| C 4.68341716 | 0.34862455  | -0.30140170 | H 0.21075794  | -4.03080129 | -1.24156164 |
| C 4.73284861 | -2.38634814 | -0.65017390 | H 0.22127311  | -2.86867036 | 2.32772146  |
| C 5.84473419 | -0.35081504 | 0.01950860  | H 1.69915515  | -1.20287978 | 1.29063864  |
| C 3.57245475 | -0.29060014 | -0.82196122 | H 2.46364028  | -3.43481306 | 0.64087826  |
| C 3.57560686 | -1.67412085 | -0.95373317 | H 1.91425394  | 4.84395290  | -1.63928020 |
| C 5.87114665 | -1.73351797 | -0.18656354 | C -0.31248335 | 4.32448242  | -0.16368259 |
| H 4.77491790 | -3.46661707 | -0.74307519 | O -1.17291403 | 3.86682465  | 0.87168094  |
| H 2.69879515 | 0.28313384  | -1.09467168 | C -2.47820398 | 3.66840838  | 0.33645661  |
| C 2.27238825 | -2.38850158 | -1.27520312 | C -2.25228903 | 3.18558087  | -1.10608408 |
| O 1.27011884 | -1.48725096 | -1.71111034 | C -1.00420581 | 3.93311157  | -1.43700828 |
| C 0.56532135 | -0.96719929 | -0.57590793 | H -0.19518685 | 5.41751077  | -0.08786949 |

|               |             |             |               |             |             |
|---------------|-------------|-------------|---------------|-------------|-------------|
| H -2.99089332 | 2.94933535  | 0.97710267  | H -1.70468253 | 1.84083833  | 2.62478279  |
| H -3.03358923 | 4.61421864  | 0.33783952  | O 6.97255294  | -2.46694822 | 0.14811418  |
| H -3.07747721 | 3.46009670  | -1.76992481 | O 6.91713025  | 0.28400652  | 0.56473567  |
| H -0.53424455 | 3.94974285  | -2.40913249 | O 2.65617057  | 1.03208974  | 1.87098989  |
| C -1.72330853 | 1.53099127  | -3.48301245 | O -4.34622117 | -2.67820514 | -1.63670404 |
| O -1.21726988 | 1.27301893  | -2.25473635 | O -6.67974276 | -1.60485289 | -0.98737403 |
| C -2.03561687 | 1.65667941  | -1.14547224 | O -4.92643866 | -1.17829297 | 2.04746259  |
| H -1.08271674 | 1.20234754  | -4.28804908 | O -4.25483281 | 1.32144631  | 2.57135808  |
| H -2.80085410 | 1.56869446  | -3.60024831 | C -5.33022621 | -2.51184638 | 1.79736054  |
| H -1.42392779 | 1.38676450  | -0.27754559 | H -4.93731954 | -3.18092340 | 2.56909704  |
| C -3.31744217 | 0.83852066  | -1.11615061 | H -4.98873747 | -2.84540654 | 0.81335994  |
| C -5.58488499 | -0.80201529 | -1.03041816 | H -6.41714898 | -2.50824169 | 1.82007436  |
| C -4.55644997 | 1.35783541  | -0.76209814 | C -3.09158043 | -3.29635875 | -1.89589362 |
| C -3.22044115 | -0.52123005 | -1.43576784 | H -2.40191681 | -3.14207478 | -1.05961411 |
| C -4.33419665 | -1.33705599 | -1.37864626 | H -3.29965267 | -4.35736966 | -2.01511668 |
| C -5.68794760 | 0.54047356  | -0.72255639 | H -2.65436262 | -2.90379507 | -2.81845888 |
| H -4.67063054 | 2.40403313  | -0.50750388 | C 8.13105815  | -2.19218288 | -0.63518201 |
| H -2.26351887 | -0.92186937 | -1.74000751 | H 7.92552116  | -2.38935833 | -1.69168230 |
| H -6.65961625 | 0.93734880  | -0.45444667 | H 8.90534850  | -2.87012823 | -0.28138485 |
| C -1.25223173 | -1.42001365 | 1.74496848  | H 8.45720670  | -1.15930577 | -0.50508211 |
| C -3.26728479 | 0.42108390  | 2.32712296  | C 3.83301936  | 1.02822516  | 2.68107029  |
| C -2.59033266 | -1.82576629 | 1.72749656  | H 3.53512588  | 0.63823661  | 3.65333966  |
| C -0.93556893 | -0.11103106 | 2.08937782  | H 4.22063191  | 2.04257884  | 2.79812972  |
| C -1.94126797 | 0.81109536  | 2.37836070  | H 4.60030016  | 0.38152142  | 2.25158119  |
| C -3.59027390 | -0.91231429 | 2.02445138  | H 6.70299317  | 1.22284144  | 0.62908267  |
| H -2.82752926 | -2.84861264 | 1.46430146  | H -5.09908149 | 0.87990377  | 2.41199351  |
| H 0.10217698  | 0.20521947  | 2.12325565  | H -6.41505249 | -2.48096323 | -1.29369059 |

**$\beta$ - $\beta'$  bottomC<sub>y</sub>-O**

|               |             |             |               |             |             |
|---------------|-------------|-------------|---------------|-------------|-------------|
| C 1.97161290  | 4.11681751  | -0.71043724 | C 0.56137881  | -4.07986305 | -0.36524474 |
| C 2.34277248  | 1.91521683  | 0.95428407  | O -0.57385799 | -3.58605991 | 0.35535881  |
| C 0.90523854  | 3.65081938  | 0.06231336  | C -0.13732731 | -2.58587386 | 1.27570468  |
| C 3.18797283  | 3.45010490  | -0.70226595 | H 0.80169370  | -5.08863447 | -0.01842930 |
| C 3.37375500  | 2.33851443  | 0.10911615  | H 0.28470249  | -4.12302795 | -1.42252133 |
| C 1.11071060  | 2.56259504  | 0.90020207  | H 0.22910419  | -3.07851815 | 2.18877286  |
| H 4.01070263  | 3.76778190  | -1.33131436 | H 1.68193714  | -1.35163202 | 1.21352599  |
| H 0.31847336  | 2.22273954  | 1.55485309  | H 2.50658010  | -3.54699030 | 0.50655817  |
| O 4.59828097  | 1.69361931  | 0.06899909  | H 1.84241907  | 4.98868858  | -1.34200250 |
| C 4.60676085  | 0.35195326  | -0.26992109 | C -0.42635676 | 4.37122645  | 0.03481410  |
| C 4.75924635  | -2.36919447 | -0.69100990 | O -1.28268812 | 3.84878897  | 1.04528558  |
| C 5.78314611  | -0.31688524 | 0.06207124  | C -2.59618650 | 3.67348106  | 0.52702848  |
| C 3.53334686  | -0.30919257 | -0.83894083 | C -2.37925229 | 3.28182309  | -0.93507836 |
| C 3.58624864  | -1.68820005 | -1.00580912 | C -1.24552124 | 4.28545216  | -1.29410427 |
| C 5.86279443  | -1.69141534 | -0.18169233 | H -0.23057668 | 5.42882839  | 0.24911539  |
| H 4.84041820  | -3.44459258 | -0.81054951 | H -3.08786453 | 2.90879039  | 1.13183945  |
| H 2.64828459  | 0.24330477  | -1.11834759 | H -3.16551043 | 4.60884656  | 0.60050929  |
| C 2.31485008  | -2.43730469 | -1.37461637 | H -3.25214010 | 3.49183498  | -1.55621129 |
| O 1.29035352  | -1.55463269 | -1.79706981 | H -1.77440899 | 5.24263756  | -1.37179677 |
| C 0.55833711  | -1.09301915 | -0.65476009 | C -0.50157431 | 4.09310008  | -2.56462298 |
| C 1.02726692  | -1.92139205 | 0.55630916  | O -1.13999149 | 1.43030271  | -1.98597888 |
| C 1.73214369  | -3.10284428 | -0.11836770 | C -2.04850409 | 1.77592096  | -1.03437745 |
| H 2.49834411  | -3.14428774 | -2.18845061 | H 0.31649193  | 3.39508801  | -2.63970820 |
| H 0.71013938  | -0.01886476 | -0.51053641 | H -0.93788172 | 4.46662389  | -3.48171608 |
| H -0.50078264 | -1.26189262 | -0.84987660 | H -1.48373483 | 1.51275935  | -0.10321078 |

|               |             |             |               |             |             |
|---------------|-------------|-------------|---------------|-------------|-------------|
| C -3.29064217 | 0.87896474  | -1.06811378 | O -6.53727814 | -1.71443473 | -1.21153346 |
| C -5.47818343 | -0.86441337 | -1.16013111 | O -4.94551226 | -1.48659824 | 1.89748908  |
| C -4.55394033 | 1.30382558  | -0.67181999 | O -4.32619499 | 0.99678424  | 2.56329349  |
| C -3.12747450 | -0.43481685 | -1.51570272 | C -5.31781521 | -2.80199268 | 1.52874168  |
| C -4.20181754 | -1.30581988 | -1.53971563 | H -4.93371990 | -3.52552479 | 2.25432992  |
| C -5.64538302 | 0.43647573  | -0.72560015 | H -4.94177145 | -3.04623099 | 0.53117219  |
| H -4.72127983 | 2.31151835  | -0.31448028 | H -6.40464913 | -2.81844243 | 1.51947264  |
| H -2.15385316 | -0.74998444 | -1.86094382 | C -2.86246242 | -3.15798794 | -2.19357598 |
| H -6.63642305 | 0.76131775  | -0.43214616 | H -2.20890696 | -3.05892731 | -1.32083849 |
| C -1.26517085 | -1.64485331 | 1.62481123  | H -3.02232801 | -4.21052309 | -2.41730541 |
| C -3.32152759 | 0.13089170  | 2.27165969  | H -2.41165841 | -2.66497953 | -3.05939605 |
| C -2.59512590 | -2.07219363 | 1.57244102  | C 8.14777581  | -2.05981899 | -0.58349666 |
| C -0.97681209 | -0.34396463 | 2.02263219  | H 7.97566774  | -2.23320365 | -1.65007508 |
| C -2.00353354 | 0.54463754  | 2.34458030  | H 8.93590298  | -2.72111088 | -0.22875050 |
| C -3.61574380 | -1.19194126 | 1.90012115  | H 8.43467545  | -1.02070050 | -0.41601869 |
| H -2.80926346 | -3.08684554 | 1.26232969  | C 3.58082301  | 0.83167318  | 2.68313171  |
| H 0.05431787  | -0.00964626 | 2.08039844  | H 3.24395610  | 0.35046120  | 3.60034425  |
| H -1.79023656 | 1.56559346  | 2.64534483  | H 3.91072329  | 1.84895299  | 2.90505077  |
| O 6.98015965  | -2.39614071 | 0.16142046  | H 4.40331523  | 0.25633432  | 2.25397128  |
| O 6.81793693  | 0.33688375  | 0.65490818  | H 6.56952515  | 1.26538081  | 0.74180179  |
| O 2.45631504  | 0.85176662  | 1.80174867  | H -5.16107069 | 0.55355838  | 2.36383800  |
| O -4.14915236 | -2.61622455 | -1.92132106 | H -6.23123674 | -2.54195778 | -1.60275067 |

**$\beta$ - $\beta'$  bottom  $C_{\alpha}$ - $C_{Ph}$   $\alpha$ -side**

|              |             |             |              |             |            |
|--------------|-------------|-------------|--------------|-------------|------------|
| C 4.12564963 | 0.63888314  | 0.39146677  | C 2.17425410 | -0.71344405 | 0.35961189 |
| O 4.29540997 | -0.31311617 | -0.56788339 | C 2.77924618 | 0.53688667  | 1.05138354 |
| C 3.39214147 | -1.37897310 | -0.27955504 | H 4.65297831 | 1.56351250  | 0.19862037 |

|               |             |             |               |             |             |
|---------------|-------------|-------------|---------------|-------------|-------------|
| H 3.17875672  | -1.89724557 | -1.21428807 | C -1.25199305 | 0.54480546  | -0.30974301 |
| H 3.87175131  | -2.07200574 | 0.41958234  | C -2.57623090 | 0.22097912  | -0.05557759 |
| H 1.67333749  | -1.38057726 | 1.05914942  | C -1.99439995 | -2.10699629 | 0.11908994  |
| H 2.84658115  | 0.43714775  | 2.13795425  | H 0.07640182  | -2.57280282 | -0.16287602 |
| C 1.80513556  | 1.64957285  | 0.65094955  | H -0.94850401 | 1.56618319  | -0.49732252 |
| O 1.38017786  | 1.29342732  | -0.65180293 | H -2.30470799 | -3.13163367 | 0.28249295  |
| C 1.16542006  | -0.11081956 | -0.65844267 | O -3.61291275 | 1.10878911  | 0.00735348  |
| H 2.26440130  | 2.63689820  | 0.59724149  | O -4.25128591 | -1.42242292 | 0.40951221  |
| H 0.95158225  | 1.68097122  | 1.34268026  | C -3.32038995 | 2.47226533  | -0.22884147 |
| H 1.39504081  | -0.44486624 | -1.67467800 | H -2.90472325 | 2.61314829  | -1.23045397 |
| C -0.28137240 | -0.45964821 | -0.33971314 | H -4.26467053 | 3.00504403  | -0.14554152 |
| C -2.95440957 | -1.11170216 | 0.16173353  | H -2.61635441 | 2.85360734  | 0.51631114  |
| C -0.66314611 | -1.77950368 | -0.12808670 | H -4.76241483 | -0.60463295 | 0.38803922  |

**$\beta$ - $\beta'$  bottom $C_{\alpha}$ - $C_{\beta}$  phenyl-side**

|               |             |             |               |             |             |
|---------------|-------------|-------------|---------------|-------------|-------------|
| C -1.03475902 | 4.19841914  | 1.93644246  | C -2.19935816 | -0.12943935 | 0.83697542  |
| C -1.08239691 | 2.53041541  | -0.33989182 | C -2.17608325 | -1.51770132 | 0.77527005  |
| C 0.04993547  | 4.01787959  | 1.11436511  | C -4.37957004 | -1.50713897 | -0.22691901 |
| C -2.18570188 | 3.47970357  | 1.60866241  | H -3.28877392 | -3.28218587 | 0.19524943  |
| C -2.20528336 | 2.65168268  | 0.49486178  | H -1.37108372 | 0.41171092  | 1.27187251  |
| C 0.08514623  | 3.22312710  | -0.00257160 | C -0.90257001 | -2.25497930 | 1.14683376  |
| H -3.07771653 | 3.53080655  | 2.22213319  | O -0.04447161 | -1.46307720 | 1.95057650  |
| H 0.96218271  | 3.11072483  | -0.62959266 | C 0.90254594  | -0.76404338 | 1.13185227  |
| O -3.36114905 | 1.93649609  | 0.23559731  | C 0.68627969  | -1.23424288 | -0.31709473 |
| C -3.28173359 | 0.55676117  | 0.31628294  | C -0.08377066 | -2.54564587 | -0.11745771 |
| C -3.27259419 | -2.19896455 | 0.25565876  | H -1.14052586 | -3.16196174 | 1.71037790  |
| C -4.38186274 | -0.10959059 | -0.22035534 | H 0.76100780  | 0.31541087  | 1.23828868  |

|               |             |             |               |             |             |
|---------------|-------------|-------------|---------------|-------------|-------------|
| H 1.90406125  | -1.01769844 | 1.48773874  | O -5.41809678 | -2.20353389 | -0.77332953 |
| C 1.05876183  | -3.56939772 | 0.06002449  | O -5.42285440 | 0.57896082  | -0.76120109 |
| O 2.27745168  | -2.92458659 | -0.31753732 | O -1.04377942 | 1.71864314  | -1.42880174 |
| C 1.97256529  | -1.71105028 | -0.98863578 | O 6.46515589  | -0.28025944 | 0.60148395  |
| H 0.90504542  | -4.45205709 | -0.56691707 | O 6.16660604  | 2.06141523  | -0.58273677 |
| H 1.16178276  | -3.88602821 | 1.10102505  | C 6.66003636  | -1.51662603 | 1.26072381  |
| H 1.76282620  | -1.92009563 | -2.04821920 | H 6.64443992  | -2.34468040 | 0.54664289  |
| H 0.14188732  | -0.49774627 | -0.90918191 | H 5.89153479  | -1.67606329 | 2.02237603  |
| H -0.72160966 | -2.79446796 | -0.96546995 | H 7.63773324  | -1.45870364 | 1.73325797  |
| H -1.00808726 | 4.84396869  | 2.80501123  | C -6.65320172 | -2.07786611 | -0.07303348 |
| C 3.11747067  | -0.73355988 | -0.89512968 | H -6.53794607 | -2.42777723 | 0.95726092  |
| C 5.16736524  | 1.14917160  | -0.68733462 | H -7.36548636 | -2.71260143 | -0.59646065 |
| C 4.27186658  | -1.04275127 | -0.17411611 | H -7.00473713 | -1.04514495 | -0.07933504 |
| C 2.99975788  | 0.50949292  | -1.50749176 | C -2.12464798 | 1.79767974  | -2.36163467 |
| C 4.02179143  | 1.44967631  | -1.40414649 | H -1.69285105 | 1.61310454  | -3.34404016 |
| C 5.28947056  | -0.10480318 | -0.07261437 | H -2.57688242 | 2.79145924  | -2.34139376 |
| H 4.34731158  | -2.01477724 | 0.29403697  | H -2.87874726 | 1.03830563  | -2.14826067 |
| H 2.10219945  | 0.75247035  | -2.06790118 | H -5.24354730 | 1.52081299  | -0.65265308 |
| H 3.94874804  | 2.42215999  | -1.87579715 | H 6.86957732  | 1.67133802  | -0.04961614 |

**$\beta$ - $\beta'$  top $C_{\alpha}$ - $C_{\beta}$**

|              |            |             |              |             |             |
|--------------|------------|-------------|--------------|-------------|-------------|
| C 1.76417953 | 3.87166984 | -1.47403161 | H 3.72144679 | 3.27739672  | -2.17414473 |
| C 2.30079171 | 2.22922527 | 0.71416867  | H 0.34492747 | 2.75777315  | 1.39182690  |
| C 0.79694409 | 3.69666421 | -0.48383577 | O 4.43963062 | 1.67468160  | -0.29644182 |
| C 2.97189115 | 3.19207558 | -1.39678703 | C 4.38079126 | 0.29199048  | -0.31379294 |
| C 3.23771627 | 2.36085633 | -0.31764735 | C 4.44885151 | -2.46089525 | -0.15135175 |
| C 1.07703530 | 2.88364509 | 0.60542734  | C 5.58642685 | -0.33645671 | -0.00621236 |



|               |             |             |               |             |             |
|---------------|-------------|-------------|---------------|-------------|-------------|
| C 3.22924929  | -0.43170895 | -0.56298301 | H -0.31627211 | 5.50450153  | -0.58969318 |
| C 3.25086970  | -1.81687502 | -0.44451611 | H -3.36115194 | 3.88572362  | 0.75846565  |
| C 5.61787464  | -1.73254085 | 0.05130932  | H -2.82774740 | 5.56716871  | 0.55183804  |
| H 4.50281077  | -3.53996684 | -0.05167512 | H -3.65715977 | 4.49610676  | -1.85200667 |
| H 2.31230462  | 0.07981767  | -0.81963525 | H -1.13823953 | 4.81330574  | -2.64198104 |
| C 1.93677695  | -2.57563673 | -0.49618634 | C -1.22411252 | 2.71665837  | -2.45080102 |
| O 0.91263837  | -1.79201839 | -1.09139483 | O -1.35051720 | 1.62180819  | -1.55190951 |
| C 0.17477314  | -1.08860511 | -0.07413271 | C -2.61613223 | 1.31042822  | -1.16102694 |
| C 0.76676603  | -1.50798218 | 1.28019201  | H -0.21794452 | 2.62747454  | -2.86377964 |
| C 1.42900059  | -2.84141851 | 0.92750218  | H -1.94979704 | 2.60067652  | -3.26412519 |
| H 2.04263071  | -3.49226775 | -1.08537907 | H -3.19008432 | 2.06977985  | -0.64285255 |
| H 0.22554137  | -0.01114945 | -0.25692978 | C -3.15091269 | 0.03078284  | -1.38702748 |
| H -0.87172762 | -1.39159247 | -0.14821524 | C -4.29579767 | -2.50574802 | -1.75065410 |
| C 0.23396689  | -3.80504925 | 1.01704896  | C -4.45542391 | -0.25676207 | -0.92341079 |
| O -0.72685559 | -3.20897033 | 1.89102217  | C -2.43294881 | -0.98610915 | -2.07403621 |
| C -0.30834538 | -1.90333466 | 2.28736198  | C -3.00032068 | -2.23178974 | -2.23709864 |
| H 0.51398917  | -4.78239233 | 1.41546686  | C -5.01734505 | -1.50553099 | -1.11167830 |
| H -0.22944808 | -3.94220024 | 0.03308798  | H -5.01221953 | 0.51623718  | -0.40583412 |
| H 0.13281560  | -1.96781669 | 3.29129704  | H -1.43416568 | -0.77187482 | -2.43219842 |
| H 1.46553462  | -0.76816173 | 1.66940452  | H -6.01912868 | -1.73008022 | -0.76492016 |
| H 2.23352796  | -3.11628864 | 1.61004605  | C -1.47086283 | -0.93563891 | 2.30290985  |
| H 1.56951429  | 4.52604935  | -2.31762790 | C -3.55859135 | 0.90226268  | 2.16723792  |
| C -0.51838041 | 4.42173024  | -0.58486362 | C -2.78773371 | -1.39071585 | 2.23622573  |
| O -1.33939880 | 4.12093429  | 0.53019644  | C -1.21217461 | 0.43074970  | 2.32799895  |
| C -2.66413367 | 4.53172381  | 0.21198173  | C -2.25319364 | 1.35171820  | 2.25055238  |
| C -2.74803753 | 4.41306347  | -1.27496663 | C -3.82750234 | -0.47253679 | 2.18486621  |
| C -1.39362743 | 4.11678363  | -1.83178002 | H -2.97094465 | -2.45575955 | 2.19688015  |

|               |             |             |               |             |             |
|---------------|-------------|-------------|---------------|-------------|-------------|
| H -0.18679646 | 0.78331783  | 2.37764541  | H -0.40831344 | -2.80603231 | -2.64293946 |
| H -2.05679327 | 2.41752098  | 2.22065896  | H -0.83969330 | -4.05967272 | -3.84725839 |
| O 6.76631410  | -2.39040754 | 0.38501921  | H -1.16060293 | -2.34181875 | -4.19610194 |
| O 6.70310710  | 0.38868994  | 0.27177325  | C 7.81801589  | -2.27388129 | -0.56944328 |
| O 2.49057115  | 1.43218545  | 1.80239973  | H 7.49386820  | -2.67139414 | -1.53607119 |
| O -2.41705358 | -3.29907313 | -2.85573085 | H 8.64320499  | -2.87174168 | -0.18738815 |
| O -4.83569461 | -3.74023646 | -1.91427571 | H 8.13474064  | -1.23577471 | -0.68018470 |
| O -5.15666293 | -0.78566198 | 2.12326544  | C 3.72473327  | 1.55580350  | 2.51093165  |
| O -4.58257289 | 1.79565345  | 2.03374164  | H 3.49471760  | 1.37517313  | 3.55994050  |
| C -5.49781458 | -2.15902932 | 2.18927762  | H 4.13461989  | 2.56147669  | 2.39474378  |
| H -5.15453692 | -2.59477205 | 3.13199751  | H 4.44838825  | 0.81471179  | 2.16613866  |
| H -5.06440477 | -2.70780959 | 1.34885211  | H 6.47737343  | 1.32303165  | 0.18711340  |
| H -6.58349532 | -2.20561695 | 2.13621378  | H -5.40924820 | 1.29856297  | 2.06861989  |
| C -1.12549655 | -3.10435197 | -3.41214963 | H -4.18668550 | -4.28370817 | -2.37808981 |

**$\beta$ - $\beta'$  topC<sub>α</sub>-O**

|              |             |             |              |             |             |
|--------------|-------------|-------------|--------------|-------------|-------------|
| C 2.04093685 | 4.05699787  | -0.71198741 | C 5.79863640 | -0.40511594 | 0.03226127  |
| C 2.44791943 | 1.90192707  | 1.00414214  | C 3.53052087 | -0.33868809 | -0.82443248 |
| C 0.98914114 | 3.59621683  | 0.08194687  | C 3.54652367 | -1.71932942 | -0.98910589 |
| C 3.26369579 | 3.39934530  | -0.70443741 | C 5.83804640 | -1.78149678 | -0.20944130 |
| C 3.46124166 | 2.30541648  | 0.12441114  | H 4.75770653 | -3.50738930 | -0.81602488 |
| C 1.21374529 | 2.53913538  | 0.95442374  | H 2.65505753 | 0.23693581  | -1.09216899 |
| H 4.07261079 | 3.70036217  | -1.35875911 | C 2.25420284 | -2.44187391 | -1.33682986 |
| H 0.42069733 | 2.19941114  | 1.60656035  | O 1.24621984 | -1.54222770 | -1.76127180 |
| O 4.67100197 | 1.63702019  | 0.05738140  | C 0.52409622 | -1.05954423 | -0.62078124 |
| C 4.63393286 | 0.29357039  | -0.27815148 | C 0.98547540 | -1.88357645 | 0.59722294  |
| C 4.70752284 | -2.43010600 | -0.69602096 | C 1.66828420 | -3.08257220 | -0.06919410 |

|               |             |             |               |             |             |
|---------------|-------------|-------------|---------------|-------------|-------------|
| H 2.41595557  | -3.16218589 | -2.14376858 | H -1.37803461 | 1.25660823  | -1.12644934 |
| H 0.68809565  | 0.01434125  | -0.49059336 | C -3.49564715 | 0.89198839  | -1.09056947 |
| H -0.53789233 | -1.22327071 | -0.80998769 | C -5.70838882 | -0.84930355 | -1.22052358 |
| C 0.48171601  | -4.04496904 | -0.29803215 | C -4.80719374 | 1.34972078  | -0.83157960 |
| O -0.64105196 | -3.52812235 | 0.42528011  | C -3.33027416 | -0.47926435 | -1.41826492 |
| C -0.18416349 | -2.52460472 | 1.33311599  | C -4.40896573 | -1.32961242 | -1.47633730 |
| H 0.71054007  | -5.05365879 | 0.05702306  | C -5.89245471 | 0.48703511  | -0.89813401 |
| H 0.19728720  | -4.09474673 | -1.35299252 | H -4.97602233 | 2.38371922  | -0.55583023 |
| H 0.18339013  | -3.01374383 | 2.24752136  | H -2.33483876 | -0.84309488 | -1.62930671 |
| H 1.65362828  | -1.31754786 | 1.24465690  | H -6.89959718 | 0.83253379  | -0.69736978 |
| H 2.43959917  | -3.53163958 | 0.55611250  | C -1.29539775 | -1.56170784 | 1.67536448  |
| H 1.89737324  | 4.90967715  | -1.36728289 | C -3.30857233 | 0.28672612  | 2.23974364  |
| C -0.37773333 | 4.23165518  | -0.01893332 | C -2.63521667 | -1.95791772 | 1.62429585  |
| O -1.21032822 | 3.74036895  | 1.01710576  | C -0.97870144 | -0.25856790 | 2.04234090  |
| C -2.54572515 | 3.69998007  | 0.54531491  | C -1.98218664 | 0.66647964  | 2.32321238  |
| C -2.42999997 | 3.21254166  | -0.90981311 | C -3.63435076 | -1.03787023 | 1.90790813  |
| C -1.15620006 | 3.97143990  | -1.35948342 | H -2.87566714 | -2.97449927 | 1.34023697  |
| H -0.26029068 | 5.31699451  | 0.10346988  | H 0.05995588  | 0.04976803  | 2.09771503  |
| H -3.11978242 | 3.03118565  | 1.18743246  | H -1.74323516 | 1.69321925  | 2.57821636  |
| H -2.98613314 | 4.70715319  | 0.57601442  | O 6.94360610  | -2.51446043 | 0.11310294  |
| H -3.28919972 | 3.57524740  | -1.48421589 | O 6.86211312  | 0.22304165  | 0.60241523  |
| H -1.48260275 | 4.94445709  | -1.73929852 | O 2.57883427  | 0.85276146  | 1.86455943  |
| C -0.35115558 | 3.33008768  | -2.49617259 | O -4.35359338 | -2.66451163 | -1.76503577 |
| O 0.39567126  | 2.22548153  | -2.16863215 | O -6.76781675 | -1.69614793 | -1.27428271 |
| C -2.34968605 | 1.72612367  | -1.04242524 | O -4.97433149 | -1.28561324 | 1.87401332  |
| H 0.27082695  | 4.07215863  | -3.01545802 | O -4.29551384 | 1.19333125  | 2.46907061  |
| H -1.06199263 | 2.95726025  | -3.25801752 | C -5.39011892 | -2.60731358 | 1.58593539  |

|               |             |             |               |             |             |
|---------------|-------------|-------------|---------------|-------------|-------------|
| H -5.04355068 | -3.29536909 | 2.36330735  | H 8.88203438  | -2.89026883 | -0.31582911 |
| H -5.01321026 | -2.93371162 | 0.61266838  | H 8.42011291  | -1.17829792 | -0.49913432 |
| H -6.47709582 | -2.58429133 | 1.56305720  | C 3.73333605  | 0.82930449  | 2.70574841  |
| C -3.06662822 | -3.22238329 | -1.99923659 | H 3.41908969  | 0.37897348  | 3.64629090  |
| H -2.41848290 | -3.09381405 | -1.12660082 | H 4.09350705  | 1.84389720  | 2.88987974  |
| H -3.22882580 | -4.28193776 | -2.18477081 | H 4.52688107  | 0.22480167  | 2.26269942  |
| H -2.60498399 | -2.76313140 | -2.87833784 | H 6.63939401  | 1.15784024  | 0.69106064  |
| C 8.10363253  | -2.21039450 | -0.65674783 | H -5.13658645 | 0.77029961  | 2.25265475  |
| H 7.90538480  | -2.38275028 | -1.71898461 | H -6.44266522 | -2.55574892 | -1.56956450 |

**$\beta$ - $\beta'$  top $C_{\beta}$ - $C_{\gamma}$**

|              |             |             |               |             |             |
|--------------|-------------|-------------|---------------|-------------|-------------|
| C 1.48046723 | 3.69629148  | -1.83017534 | H 2.31174122  | -0.11843765 | -1.01055709 |
| C 2.19447708 | 2.19231938  | 0.40371397  | C 2.21485521  | -2.78865515 | -0.45824208 |
| C 0.58719462 | 3.56980419  | -0.76981333 | O 1.06888573  | -2.19363605 | -1.04450900 |
| C 2.70675542 | 3.04560056  | -1.79835587 | C 0.37978588  | -1.40230480 | -0.06417504 |
| C 3.06295748 | 2.29002779  | -0.69398315 | C 1.08261353  | -1.63297359 | 1.28525953  |
| C 0.95228726 | 2.81636249  | 0.34296160  | C 1.84286488  | -2.93669884 | 1.02389681  |
| H 3.40634033 | 3.11120328  | -2.62255396 | H 2.38333993  | -3.74816440 | -0.95542626 |
| H 0.28407355 | 2.72092049  | 1.19194980  | H 0.38470754  | -0.35313332 | -0.36968106 |
| O 4.30734067 | 1.68536842  | -0.69762698 | H -0.65728353 | -1.74936128 | -0.02744883 |
| C 4.37121017 | 0.30588220  | -0.63254019 | C 0.76617004  | -3.99824092 | 1.33816269  |
| C 4.71228378 | -2.41110707 | -0.31955924 | O -0.30474634 | -3.33868490 | 2.02256098  |
| C 5.64741156 | -0.18813564 | -0.36318627 | C 0.11338515  | -2.03156798 | 2.39158586  |
| C 3.28138655 | -0.53334134 | -0.77301218 | H 1.16198958  | -4.79722320 | 1.97063944  |
| C 3.44263747 | -1.90142419 | -0.57234361 | H 0.35452857  | -4.43813747 | 0.42575112  |
| C 5.81679951 | -1.56839280 | -0.23224157 | H 0.65715204  | -2.07626904 | 3.34657797  |
| H 4.87362788 | -3.47210024 | -0.15947112 | H 1.72394716  | -0.79696969 | 1.56078999  |

|               |             |             |               |             |             |
|---------------|-------------|-------------|---------------|-------------|-------------|
| H 2.72326612  | -3.05009229 | 1.65626452  | C -1.05616868 | -1.08871940 | 2.53061189  |
| H 1.21982263  | 4.30326246  | -2.69029513 | C -3.15743019 | 0.73828739  | 2.67121949  |
| C -0.75977085 | 4.24157813  | -0.85103418 | C -2.35863949 | -1.51093757 | 2.26523252  |
| O -1.04022972 | 4.81474973  | 0.42172151  | C -0.81481608 | 0.23945357  | 2.87427412  |
| C -2.12345414 | 5.62222109  | 0.46568521  | C -1.86448126 | 1.15222604  | 2.94566708  |
| C -2.37915106 | 2.39157430  | -0.18362340 | C -3.40534626 | -0.60124820 | 2.34195563  |
| C -1.92133490 | 3.29681597  | -1.28102203 | H -2.52786267 | -2.54491680 | 1.99677432  |
| H -0.69365136 | 5.05335368  | -1.58857272 | H 0.20061843  | 0.57481700  | 3.06169274  |
| H -2.30993032 | 6.04457269  | 1.44170668  | H -1.69361961 | 2.19439749  | 3.19044197  |
| H -2.39113681 | 6.16291768  | -0.43752087 | O 7.03982825  | -2.09663530 | 0.06424958  |
| H -2.92464309 | 2.70384125  | 0.69460343  | O 6.70226624  | 0.65344028  | -0.19469742 |
| H -2.73852084 | 3.93442374  | -1.63513976 | O 2.49004804  | 1.46911221  | 1.52168731  |
| C -1.51569984 | 2.26743346  | -2.35187151 | O -3.78823908 | -3.05591109 | -2.80850175 |
| O -1.11208561 | 1.11790679  | -1.62160718 | O -6.29236920 | -2.34877952 | -2.32341364 |
| C -2.05064795 | 0.97892202  | -0.54684245 | O -4.71707548 | -0.88646311 | 2.11358534  |
| H -0.68140687 | 2.57127915  | -2.98369948 | O -4.18393183 | 1.63076443  | 2.69734379  |
| H -2.38046897 | 2.02723708  | -2.98233952 | C -5.01206326 | -2.15545401 | 1.55400019  |
| H -1.53271172 | 0.46027092  | 0.26659799  | H -4.80902334 | -2.95080875 | 2.27680062  |
| C -3.23047745 | 0.12541952  | -1.00227087 | H -4.42553541 | -2.31452597 | 0.64484566  |
| C -5.29472641 | -1.53078110 | -1.89959236 | H -6.07059487 | -2.14278639 | 1.30451026  |
| C -4.55448881 | 0.46175468  | -0.76697401 | C -2.45717322 | -3.49441977 | -3.02285009 |
| C -2.93234507 | -1.05417463 | -1.69918762 | H -1.92877377 | -3.61138324 | -2.07198217 |
| C -3.95286059 | -1.87795727 | -2.13797924 | H -2.53166632 | -4.45551138 | -3.52585714 |
| C -5.58731555 | -0.36444558 | -1.21967212 | H -1.91130862 | -2.78839905 | -3.65405179 |
| H -4.79461748 | 1.37383712  | -0.23239140 | C 8.01900095  | -1.94127827 | -0.95950420 |
| H -1.89599640 | -1.28818436 | -1.90900255 | H 7.67961397  | -2.42509985 | -1.88041163 |
| H -6.62713292 | -0.11462788 | -1.04571027 | H 8.91846760  | -2.43566840 | -0.59779873 |

|              |             |             |               |             |             |
|--------------|-------------|-------------|---------------|-------------|-------------|
| H 8.22739730 | -0.88694431 | -1.14692051 | H 4.50232591  | 1.00019131  | 1.80556597  |
| C 3.75002873 | 1.71249384  | 2.15016812  | H 6.38372641  | 1.55527777  | -0.32287945 |
| H 3.59049710 | 1.57963253  | 3.21945839  | H -4.99286086 | 1.14785058  | 2.48443363  |
| H 4.08500486 | 2.73377195  | 1.95635645  | H -5.88806439 | -3.09742843 | -2.77844640 |

**$\beta$ - $\beta'$  topC<sub>γ</sub>-O**

|              |             |             |               |             |             |
|--------------|-------------|-------------|---------------|-------------|-------------|
| C 2.05812827 | 4.03715103  | -1.26709678 | C 1.40209968  | -3.18062395 | 0.29011370  |
| C 2.19336311 | 2.15827912  | 0.78685911  | H 2.05341331  | -3.30247376 | -1.81387394 |
| C 0.98118357 | 3.88783611  | -0.39888494 | H 0.54537267  | -0.06947056 | -0.12450560 |
| C 3.19314760 | 3.24979582  | -1.12468660 | H -0.79735042 | -1.20403670 | -0.37073873 |
| C 3.26343645 | 2.31217220  | -0.10950149 | C 0.21350906  | -4.15524846 | 0.12993295  |
| C 1.06257831 | 2.95359949  | 0.62986013  | O -0.91024809 | -3.57499117 | 0.79011432  |
| H 4.03867099 | 3.34357576  | -1.79515526 | C -0.43879991 | -2.58656251 | 1.69851385  |
| H 0.25030091 | 2.83007420  | 1.33991942  | H 0.44142323  | -5.12813102 | 0.57695964  |
| O 4.42634887 | 1.57163621  | 0.00609866  | H -0.06346506 | -4.30295902 | -0.91660655 |
| C 4.35749854 | 0.20800402  | -0.20394987 | H -0.08617578 | -3.07866250 | 2.61798679  |
| C 4.38487068 | -2.53994917 | -0.39052434 | H 1.42838340  | -1.41699575 | 1.61287292  |
| C 5.51169236 | -0.48114230 | 0.16468156  | H 2.20228540  | -3.61521918 | 0.88818330  |
| C 3.23942904 | -0.44746220 | -0.68621054 | H 2.01889187  | 4.77758604  | -2.05903926 |
| C 3.23384637 | -1.83718777 | -0.73600584 | C -0.23478097 | 4.77758442  | -0.57815700 |
| C 5.52807902 | -1.87268810 | 0.03843664  | O -0.61546491 | 5.45114538  | 0.54887097  |
| H 4.41765406 | -3.62404865 | -0.42089748 | C -2.55603443 | 3.44734839  | 1.02013040  |
| H 2.37241584 | 0.11819440  | -0.99676051 | C -2.35868946 | 3.16491819  | -0.42681969 |
| C 1.92964647 | -2.56630927 | -1.01429889 | C -1.48754337 | 4.12812511  | -1.26210860 |
| O 0.90117064 | -1.67470149 | -1.40984336 | H 0.04445469  | 5.57061673  | -1.29795984 |
| C 0.28095835 | -1.12499261 | -0.23538481 | H -1.96780968 | 4.18936238  | 1.54510994  |
| C 0.74638531 | -1.96717810 | 0.96476365  | H -3.35425173 | 2.95179748  | 1.55866973  |

|               |             |             |               |             |             |
|---------------|-------------|-------------|---------------|-------------|-------------|
| H -3.34327384 | 3.19118241  | -0.91220409 | O 6.62162688  | -2.59611859 | 0.41605253  |
| H -2.10045061 | 4.96217214  | -1.60786886 | O 6.58792818  | 0.17632777  | 0.67284722  |
| C -1.07520528 | 3.20209425  | -2.40719426 | O 2.17516363  | 1.22034155  | 1.77608153  |
| O -0.80344065 | 1.95849484  | -1.78674566 | O -3.01014084 | -2.39819178 | -3.12640338 |
| C -1.76181308 | 1.75629929  | -0.74939607 | O -5.42732156 | -2.36233231 | -2.05511252 |
| H -0.17484060 | 3.51394956  | -2.93868419 | O -5.21083475 | -1.23993107 | 2.01988820  |
| H -1.90036970 | 3.10331486  | -3.12490207 | O -4.51585635 | 1.15194655  | 2.87881096  |
| H -1.21211970 | 1.37587075  | 0.11824858  | C -5.63176199 | -2.49878673 | 1.51979600  |
| C -2.79458529 | 0.72092515  | -1.15156762 | H -5.31177221 | -3.30248497 | 2.18894265  |
| C -4.57492669 | -1.34041285 | -1.77093132 | H -5.24031034 | -2.66968092 | 0.51382485  |
| C -4.07353273 | 0.70545969  | -0.61024232 | H -6.71839805 | -2.46207023 | 1.48463497  |
| C -2.40833104 | -0.30010053 | -2.02890853 | C -1.67716594 | -2.52250431 | -3.59849902 |
| C -3.28349321 | -1.33155792 | -2.32134166 | H -0.96539425 | -2.51897619 | -2.76778147 |
| C -4.96786381 | -0.31638996 | -0.93121321 | H -1.63376522 | -3.46941779 | -4.13214167 |
| H -4.38963523 | 1.47626570  | 0.08460321  | H -1.43368177 | -1.70543023 | -4.28356410 |
| H -1.41136405 | -0.27694211 | -2.45055171 | C 7.78715427  | -2.37166761 | -0.37305287 |
| H -5.96771250 | -0.33801599 | -0.51482091 | H 7.58547402  | -2.61936904 | -1.41961027 |
| C -1.53490737 | -1.60471886 | 2.03278805  | H 8.55247814  | -3.03878322 | 0.01867819  |
| C -3.53443075 | 0.24090822  | 2.63260648  | H 8.12297222  | -1.33690222 | -0.29249665 |
| C -2.87607841 | -1.95069506 | 1.84546488  | C 3.30584431  | 1.14598136  | 2.64658910  |
| C -1.20699913 | -0.34530684 | 2.52289454  | H 2.92165048  | 0.85105170  | 3.62229888  |
| C -2.20750752 | 0.57699757  | 2.82601278  | H 3.79449451  | 2.11928367  | 2.72714115  |
| C -3.86944115 | -1.03391108 | 2.15266996  | H 4.01894600  | 0.39682117  | 2.29667938  |
| H -3.11493162 | -2.92488386 | 1.44078637  | H 6.38132484  | 1.11887294  | 0.68299083  |
| H -0.16803016 | -0.05869618 | 2.65194156  | H -5.36376885 | 0.71879770  | 2.71897043  |
| H -1.96775100 | 1.56497961  | 3.20002666  | H -4.96918771 | -2.96762589 | -2.65140719 |

**$\beta$ - $\beta'$  topC $_{\alpha}$ -C $_{\beta}$   $\alpha$ -side**

|               |             |             |               |             |             |
|---------------|-------------|-------------|---------------|-------------|-------------|
| C 0.35787124  | 3.85217885  | -0.84375415 | O -0.74965929 | -3.92256626 | 0.04837940  |
| C 1.15759770  | 1.92796553  | 1.01084248  | C -0.62545284 | -2.81439323 | 0.92951407  |
| C -0.59879476 | 3.18077430  | -0.08186747 | H 0.91871779  | -5.10694696 | -0.25346476 |
| C 1.70067233  | 3.52166635  | -0.72275648 | H 0.31328677  | -4.22430085 | -1.67624165 |
| C 2.10043827  | 2.54894735  | 0.18276523  | H -0.25670297 | -3.16333572 | 1.90528205  |
| C -0.19194865 | 2.23175281  | 0.84708658  | H 0.88797335  | -1.22702467 | 0.96883160  |
| H 2.45751812  | 3.98530294  | -1.34383587 | H 2.19883150  | -3.24714903 | 0.46052516  |
| H -0.92456116 | 1.71057997  | 1.45064967  | H 0.05218637  | 4.61001290  | -1.55742283 |
| O 3.43430560  | 2.17818696  | 0.21295995  | C -2.06151243 | 3.45387680  | -0.30704948 |
| C 3.70989438  | 0.87180099  | -0.15866928 | O -2.83717179 | 2.84316527  | 0.70146560  |
| C 4.38526376  | -1.75397249 | -0.66674125 | C -4.16973710 | 2.83727380  | 0.22424041  |
| C 4.97753778  | 0.42102741  | 0.20143825  | C -4.05834664 | 2.43643489  | -1.26152314 |
| C 2.79988060  | 0.04391518  | -0.79091497 | C -2.63678101 | 2.93110593  | -1.65833532 |
| C 3.11849362  | -1.29038595 | -1.01012435 | H -2.22853077 | 4.54198037  | -0.27557608 |
| C 5.32053190  | -0.90464359 | -0.08193495 | H -4.74545273 | 2.13168314  | 0.82219070  |
| H 4.67221002  | -2.78859876 | -0.82323716 | H -4.60212794 | 3.84407923  | 0.31718219  |
| H 1.83328704  | 0.42605773  | -1.08474622 | H -4.85962475 | 2.89149457  | -1.84836191 |
| C 2.02416249  | -2.23649989 | -1.47578101 | H -2.65268225 | 3.73524937  | -2.39355362 |
| O 0.92350324  | -1.53529150 | -2.02982248 | C -1.97638249 | 1.67810040  | -2.24661232 |
| C -0.05304921 | -1.26287425 | -1.01227393 | O -2.67045044 | 0.56389183  | -1.68653334 |
| C 0.43917160  | -1.94051567 | 0.27763062  | C -3.95784853 | 0.95695110  | -1.48460877 |
| C 1.43309328  | -2.97181759 | -0.26477685 | H -0.91812093 | 1.57257024  | -2.01177186 |
| H 2.40434028  | -2.91811750 | -2.24230823 | H -2.10584293 | 1.65764239  | -3.33328083 |
| H -0.17165051 | -0.18473489 | -0.87844601 | H -4.59559979 | 0.21335846  | -1.02843087 |
| H -1.01231363 | -1.66286996 | -1.34692344 | C -1.94446621 | -2.10723658 | 1.12216746  |
| C 0.50401951  | -4.15742010 | -0.60178079 | C -4.32659653 | -0.70173466 | 1.45498074  |



|               |             |             |               |             |             |
|---------------|-------------|-------------|---------------|-------------|-------------|
| C -3.10107274 | -2.54927766 | 0.48065769  | H -5.23858623 | -4.16905906 | -0.34431765 |
| C -1.98624800 | -0.96331884 | 1.91275617  | H -4.79942617 | -3.06017428 | -1.67553938 |
| C -3.17443228 | -0.25575727 | 2.07693520  | H -6.51273093 | -3.29647324 | -1.23527457 |
| C -4.28421210 | -1.84476263 | 0.64744808  | C 7.64616303  | -0.83114014 | -0.40250189 |
| H -3.04556041 | -3.42912939 | -0.14570574 | H 7.54716995  | -1.00076750 | -1.47897168 |
| H -1.08065369 | -0.60905680 | 2.39611412  | H 8.53158812  | -1.34419884 | -0.03218235 |
| H -3.21829755 | 0.64933765  | 2.67127987  | H 7.72712631  | 0.23772344  | -0.19925665 |
| O 6.53720792  | -1.40179016 | 0.28688804  | C 2.58341614  | 1.21303421  | 2.79056574  |
| O 5.85218337  | 1.23426886  | 0.85358402  | H 2.33837076  | 0.73458746  | 3.73763643  |
| O 1.47774157  | 0.96745474  | 1.92049267  | H 2.71767495  | 2.28564829  | 2.94713358  |
| O -5.48044159 | -2.14862703 | 0.05536188  | H 3.50017153  | 0.77573028  | 2.39126973  |
| O -5.49557796 | -0.01293906 | 1.59244065  | H 5.43338752  | 2.09775576  | 0.95455688  |
| C -5.49697171 | -3.23562231 | -0.85161116 | H -6.18462633 | -0.50748440 | 1.13199928  |

**$\beta$ - $\beta'$  topC $_{\alpha}$ -C $_{\text{Ph}}$  phenyl-side**

|               |             |             |               |             |             |
|---------------|-------------|-------------|---------------|-------------|-------------|
| C 1.27961793  | -1.71940422 | -0.00000033 | H 2.64267065  | 1.35032334  | 0.00000090  |
| C 0.56530546  | 0.90279898  | -0.00000011 | O -1.70210452 | 0.39168562  | 0.00000278  |
| C 2.28593573  | -0.79262286 | -0.00000016 | O 0.20632753  | 2.21224797  | -0.00000236 |
| C -0.07054644 | -1.44047699 | 0.00000043  | C -2.75863461 | -0.54877107 | -0.00000171 |
| C -0.42696626 | -0.09382889 | 0.00000036  | H -2.71860300 | -1.17706309 | 0.89439902  |
| C 1.90536454  | 0.55640384  | 0.00000041  | H -3.68046137 | 0.02782237  | -0.00000335 |
| H 3.33207727  | -1.07189165 | -0.00000029 | H -2.71859774 | -1.17705998 | -0.89440437 |
| H -0.81434601 | -2.22700255 | 0.00000094  | H -0.75698202 | 2.25881013  | 0.00001043  |

**$\beta''$ - $\beta'''$  Cleavage**

|              |            |             |              |            |             |
|--------------|------------|-------------|--------------|------------|-------------|
| C 2.41339141 | 3.92634224 | -1.39909383 | C 1.44702699 | 3.70290038 | -0.42168495 |
| C 2.83043419 | 1.96245716 | 0.51747542  | C 3.56999550 | 3.15056312 | -1.44803699 |

|               |             |             |               |             |             |
|---------------|-------------|-------------|---------------|-------------|-------------|
| C 3.77719062  | 2.16612482  | -0.49517077 | H 1.50766058  | -0.74708703 | 0.72792913  |
| C 1.66826435  | 2.71646285  | 0.53711734  | H 2.32744596  | -4.58260052 | -1.15527515 |
| H 4.31845451  | 3.29596054  | -2.21732904 | H 2.25904778  | 4.70014066  | -2.14411899 |
| H 0.92985856  | 2.52452940  | 1.30566707  | C 0.14384814  | 4.46350964  | -0.44038642 |
| O 4.93273550  | 1.40467126  | -0.54145640 | O -0.37755894 | 4.53173649  | 0.87950504  |
| C 4.72127844  | 0.03041163  | -0.52910010 | C -1.78583702 | 4.63512394  | 0.78280676  |
| C 4.18984561  | -2.64539945 | -0.20532251 | C -2.15744935 | 3.66467700  | -0.32978554 |
| C 5.45837612  | -0.68680555 | 0.40726155  | C -0.98567795 | 3.82721482  | -1.32522981 |
| C 3.78251978  | -0.57398496 | -1.34156655 | H 0.33259223  | 5.48264339  | -0.80279476 |
| C 3.46609502  | -1.91640076 | -1.14641904 | H -2.20822229 | 4.38268434  | 1.75635944  |
| C 5.19933683  | -2.05064809 | 0.54712738  | H -2.07968004 | 5.66068613  | 0.52066845  |
| H 3.98088647  | -3.68763845 | -0.00198324 | H -3.12926992 | 3.88127108  | -0.77311299 |
| H 3.25068624  | 0.01965191  | -2.07362307 | H -1.22847593 | 4.47961605  | -2.16425349 |
| C 2.32090738  | -2.52235376 | -1.96162761 | C -0.73203802 | 2.39388391  | -1.76246470 |
| O 1.37595679  | -1.55600169 | -2.37979158 | O -0.92102317 | 1.63845285  | -0.57825904 |
| C 0.78688146  | -0.68238737 | -1.38914103 | C -2.05320352 | 2.17116254  | 0.09907491  |
| C 0.82015886  | -1.17675910 | 0.01106220  | H 0.27675379  | 2.20473084  | -2.12930377 |
| C 1.69023029  | -3.71799707 | -1.30088748 | H -1.45697350 | 2.09755949  | -2.53338628 |
| H 2.75321820  | -2.86955954 | -2.91228200 | H -1.83033508 | 2.09992505  | 1.16803454  |
| H 1.27418503  | 0.29416699  | -1.43755524 | C -3.30208881 | 1.36189626  | -0.19443537 |
| H -0.24631234 | -0.56122558 | -1.72087153 | C -5.58433258 | -0.17505354 | -0.67821463 |
| C 0.21984353  | -3.98044250 | -1.23833836 | C -4.50654824 | 1.66854026  | 0.42953397  |
| O -0.60733558 | -2.93672834 | -0.74113354 | C -3.24007884 | 0.27312136  | -1.06238355 |
| C -0.13122117 | -2.25989868 | 0.41672728  | C -4.37246491 | -0.48843690 | -1.30581237 |
| H 0.06103217  | -4.88170081 | -0.63164545 | C -5.64427831 | 0.90190959  | 0.19132267  |
| H -0.17911305 | -4.18276445 | -2.24140881 | H -4.56092552 | 2.49445554  | 1.13204245  |
| H 0.38531670  | -2.98520907 | 1.06693904  | H -2.28960952 | 0.00653445  | -1.50185751 |

|               |             |             |               |             |             |
|---------------|-------------|-------------|---------------|-------------|-------------|
| H -6.58652581 | 1.12253953  | 0.67825408  | H -4.66469931 | -4.26728300 | 1.07191723  |
| C -1.33958260 | -1.70956922 | 1.17259657  | H -4.91082853 | -3.09940328 | -0.26044456 |
| C -3.54279432 | -0.72263476 | 2.58622965  | H -6.27755943 | -3.55285119 | 0.79263748  |
| C -2.59189293 | -2.31722158 | 1.03122930  | C -3.21215731 | -1.97521501 | -2.75792607 |
| C -1.20305509 | -0.62582358 | 2.03234967  | H -2.43778435 | -2.20868905 | -2.02118958 |
| C -2.29806838 | -0.14324684 | 2.74695351  | H -3.45274989 | -2.86186237 | -3.34095533 |
| C -3.68525145 | -1.82058032 | 1.72397882  | H -2.85992871 | -1.18492020 | -3.42774313 |
| H -2.69650584 | -3.15508140 | 0.35503375  | C 7.24602904  | -2.93566147 | 1.28709084  |
| H -0.24223232 | -0.13668958 | 2.14222718  | H 7.43619169  | -3.41573136 | 0.32225258  |
| H -2.20506953 | 0.70262670  | 3.41837458  | H 7.60974908  | -3.57417877 | 2.08992721  |
| O 5.84415226  | -2.79275246 | 1.49539127  | H 7.75050181  | -1.96913217 | 1.32750222  |
| O 6.34903043  | -0.06493113 | 1.22422166  | C 3.71472253  | 1.46369556  | 2.62468423  |
| O 3.04306477  | 0.99135935  | 1.45983665  | H 3.95769212  | 0.58664565  | 3.22130530  |
| O -4.42251300 | -1.58530388 | -2.12208874 | H 3.06869944  | 2.14178364  | 3.18987038  |
| O -6.69028943 | -0.93369073 | -0.90864742 | H 4.63643310  | 1.98657708  | 2.35232766  |
| O -4.96076580 | -2.30100650 | 1.65064541  | H 6.36842567  | 0.86638732  | 0.97123504  |
| O -4.61997255 | -0.23497179 | 3.25090134  | H -5.39796778 | -0.71037138 | 2.93288242  |
| C -5.20611232 | -3.36945985 | 0.75745685  | H -6.46137074 | -1.58790447 | -1.57955753 |

**$\beta''$ - $\beta'''$  bottom  $C_\alpha$ - $C_\beta$**

|               |            |             |               |             |             |
|---------------|------------|-------------|---------------|-------------|-------------|
| C -1.78552329 | 3.98876125 | 1.35862778  | H -0.00444118 | 2.57758673  | -1.15417155 |
| C -2.07408493 | 2.21371759 | -0.77762188 | O -4.31018741 | 1.72526901  | 0.00218043  |
| C -0.68685608 | 3.66989356 | 0.56142126  | C -4.24546257 | 0.37740131  | 0.31179219  |
| C -3.00200922 | 3.35779292 | 1.14038334  | C -4.42909389 | -2.32772904 | 0.85543734  |
| C -3.13293564 | 2.44289929 | 0.10535157  | C -5.49248117 | -0.25564838 | 0.23765667  |
| C -0.84761030 | 2.81548441 | -0.51968473 | C -3.09128515 | -0.30668338 | 0.63647604  |
| H -3.85445063 | 3.52496375 | 1.78774482  | C -3.16149015 | -1.69800604 | 0.88693295  |

|               |             |             |               |             |             |
|---------------|-------------|-------------|---------------|-------------|-------------|
| C -5.57273566 | -1.62257214 | 0.53607179  | H 3.40869786  | 4.52904606  | 0.61113704  |
| H -4.52360841 | -3.38989392 | 1.05020330  | H 3.43431667  | 2.60472136  | 2.07753652  |
| H -2.14359018 | 0.20952606  | 0.71827996  | H 1.63241896  | 3.96170041  | 2.92232637  |
| C -2.01815705 | -2.48390878 | 1.14454876  | C 0.61189518  | 2.06996922  | 2.57831233  |
| O -0.73146625 | -2.09563492 | 1.02030462  | O 0.78410763  | 1.11760991  | 1.54269047  |
| C -0.20772133 | -1.46188164 | -0.16872125 | C 2.07826044  | 1.28995981  | 0.96397816  |
| C -0.94149374 | -1.79274813 | -1.47240421 | H -0.45869412 | 2.20309117  | 2.73248748  |
| C -1.26169266 | -3.24265854 | -1.66171321 | H 1.06753020  | 1.71045063  | 3.51074100  |
| H -2.12819430 | -3.49455886 | 1.52296787  | H 1.92812087  | 1.26412119  | -0.12188977 |
| H -0.17382875 | -0.37888175 | -0.01497080 | C 3.01879574  | 0.16727444  | 1.35759366  |
| H 0.82050978  | -1.82548161 | -0.21899698 | C 4.75975555  | -1.91222052 | 2.02965216  |
| C -0.56332356 | -3.74815033 | -2.87618122 | C 4.38751302  | 0.29207247  | 1.14713471  |
| O 0.44012088  | -2.78395757 | -3.13832915 | C 2.51160202  | -1.01682904 | 1.90238254  |
| C -0.05305856 | -1.51183462 | -2.73301588 | C 3.37823183  | -2.04969056 | 2.23263446  |
| H -1.24768794 | -3.82862547 | -3.73870077 | C 5.25793409  | -0.74115708 | 1.48758521  |
| H -0.07874758 | -4.71950459 | -2.74392489 | H 4.78859547  | 1.20039051  | 0.70825423  |
| H -0.71656742 | -1.11757902 | -3.51504957 | H 1.44370648  | -1.10814911 | 2.06080208  |
| H -1.84284446 | -1.17457435 | -1.52614139 | H 6.32651081  | -0.65624168 | 1.32959781  |
| H -2.08382446 | -3.75320759 | -1.18158653 | C 1.12725950  | -0.57736341 | -2.58990988 |
| H -1.67693360 | 4.68353980  | 2.18500602  | C 3.34596066  | 1.10835513  | -2.40283829 |
| C 0.69057165  | 4.14817903  | 0.94408612  | C 2.38055297  | -1.10202934 | -2.25213424 |
| O 1.55287213  | 4.04660043  | -0.17978936 | C 1.00137236  | 0.78326155  | -2.83432585 |
| C 2.84514746  | 3.65614357  | 0.25515816  | C 2.10824246  | 1.63027507  | -2.73300275 |
| C 2.58309734  | 2.69242074  | 1.40198462  | C 3.48192607  | -0.26835253 | -2.16507490 |
| C 1.35438600  | 3.30852964  | 2.09436008  | H 2.47595082  | -2.16867585 | -2.10257635 |
| H 0.63434269  | 5.19627656  | 1.26374538  | H 0.03364326  | 1.19182544  | -3.10245867 |
| H 3.36875903  | 3.21659517  | -0.59456083 | H 2.02085305  | 2.69661541  | -2.90867298 |

|               |             |             |               |             |             |
|---------------|-------------|-------------|---------------|-------------|-------------|
| O -6.76746532 | -2.27893652 | 0.45227201  | H 1.53812813  | -4.49658614 | 3.33680809  |
| O -6.60519243 | 0.43299527  | -0.12708831 | H 1.20342557  | -2.77482686 | 3.66117735  |
| O -2.13137957 | 1.33668808  | -1.81769658 | C -7.72250844 | -1.89095068 | 1.43554850  |
| O 3.01215343  | -3.25255487 | 2.76282306  | H -7.32712271 | -2.07952867 | 2.43846615  |
| O 5.59957383  | -2.93340801 | 2.34332954  | H -8.60182100 | -2.50988315 | 1.26768085  |
| O 4.75418484  | -0.66385984 | -1.87966317 | H -7.98796624 | -0.83768977 | 1.33113867  |
| O 4.43561438  | 1.91813419  | -2.29878229 | C -3.31855067 | 1.28078219  | -2.60630544 |
| C 4.94047311  | -2.02411276 | -1.52617270 | H -3.00018703 | 1.00259518  | -3.61069980 |
| H 4.73141319  | -2.67388983 | -2.38079701 | H -3.81087858 | 2.25493655  | -2.63483874 |
| H 4.29695265  | -2.29068248 | -0.68331974 | H -4.00932979 | 0.52679190  | -2.22227422 |
| H 5.98190456  | -2.12471820 | -1.22928128 | H -6.34974275 | 1.35251894  | -0.26982339 |
| C 1.62401463  | -3.48583463 | 2.94446325  | H 5.19765065  | 1.35544781  | -2.11030629 |
| H 1.08343238  | -3.39807367 | 1.99904524  | H 5.06660042  | -3.64991898 | 2.70908183  |

**$\beta''$ - $\beta'''$  bottomC $_{\alpha}$ -O**

|              |             |             |               |             |             |
|--------------|-------------|-------------|---------------|-------------|-------------|
| C 2.34380609 | 3.34817742  | -1.14924783 | C 3.83529064  | -0.92252178 | 0.68815200  |
| C 2.68463987 | 2.01314670  | 1.27461753  | C 3.67285060  | -2.23911251 | 0.20327955  |
| C 1.29090870 | 3.29672846  | -0.23325757 | C 5.48644061  | -1.81114540 | -1.38088090 |
| C 3.52767786 | 2.67741206  | -0.88648813 | H 4.46172522  | -3.65806965 | -1.24827972 |
| C 3.69457736 | 1.98900623  | 0.30893655  | H 3.22223552  | -0.54783977 | 1.49141454  |
| C 1.47395083 | 2.63835644  | 0.97525592  | C 2.65604636  | -3.08862353 | 0.70331783  |
| H 4.33446214 | 2.65745431  | -1.61061361 | O -0.23812970 | -2.22227018 | -0.29431659 |
| H 0.67991945 | 2.61489981  | 1.71117473  | C 0.37007850  | -1.16493614 | 0.32803910  |
| O 4.86617110 | 1.25881405  | 0.50257932  | C 0.88387314  | -1.45550548 | 1.73426829  |
| C 4.74977276 | -0.07224813 | 0.10837111  | C 1.73990849  | -2.74489022 | 1.83679702  |
| C 4.53268993 | -2.65419664 | -0.84533779 | H 2.56057989  | -4.07255155 | 0.25658880  |
| C 5.60632756 | -0.49035240 | -0.91040157 | H 1.23306343  | -0.93242445 | -0.33183134 |

|               |             |             |               |             |             |
|---------------|-------------|-------------|---------------|-------------|-------------|
| H -0.25276134 | -0.26264438 | 0.29198842  | C -5.33598684 | -0.91064292 | -2.17313942 |
| C 0.66422744  | -3.82775650 | 2.08496637  | C -4.53323063 | 1.24197907  | -1.46651895 |
| O -0.52891838 | -3.16361568 | 2.49193251  | C -2.98586456 | -0.59100410 | -1.68024058 |
| C -0.24151568 | -1.79794285 | 2.72768053  | C -4.02711581 | -1.41082410 | -2.07899382 |
| H 0.97244317  | -4.53322850 | 2.86205146  | C -5.58354394 | 0.41257163  | -1.86500350 |
| H 0.44340068  | -4.37330944 | 1.16527653  | H -4.75101363 | 2.27302697  | -1.21192765 |
| H 0.15802649  | -1.67756381 | 3.74633258  | H -1.97753498 | -0.97555865 | -1.58108191 |
| H 1.40127700  | -0.56303232 | 2.09113385  | H -6.59954997 | 0.78137654  | -1.93749664 |
| H 2.34299063  | -2.63626473 | 2.75049764  | C -1.46654045 | -0.93701436 | 2.58073459  |
| H 2.22826105  | 3.89084212  | -2.08189824 | C -3.61042819 | 0.77936392  | 2.10502403  |
| C -0.01229659 | 3.98813297  | -0.55487322 | C -2.60428241 | -1.41646310 | 1.92931860  |
| O -0.88431620 | 3.89896092  | 0.56153264  | C -1.42197985 | 0.38222404  | 3.01668806  |
| C -2.21763978 | 3.95782269  | 0.08367509  | C -2.49186873 | 1.24235071  | 2.77689189  |
| C -2.18639982 | 3.11132165  | -1.17963428 | C -3.67764591 | -0.56496414 | 1.70608683  |
| C -0.80865076 | 3.44084255  | -1.79071392 | H -2.62508319 | -2.45070267 | 1.61134830  |
| H 0.20530955  | 5.04862469  | -0.74446990 | H -0.54127553 | 0.75173226  | 3.53258587  |
| H -2.87641231 | 3.56359666  | 0.85946191  | H -2.46341646 | 2.27883191  | 3.09226431  |
| H -2.49931765 | 4.99519051  | -0.14135906 | O 6.32637434  | -2.27264645 | -2.35335665 |
| H -3.00180711 | 3.33241967  | -1.86714745 | O 6.52521862  | 0.34831021  | -1.44717740 |
| H -0.87233658 | 4.20645236  | -2.56481371 | O 2.78407441  | 1.40908044  | 2.49454163  |
| C -0.39253626 | 2.09322650  | -2.36276770 | O -3.91815808 | -2.73887312 | -2.38063013 |
| O -0.83404066 | 1.15177334  | -1.40567949 | O -6.35137802 | -1.73648347 | -2.53920022 |
| C -2.08360841 | 1.59836756  | -0.86973043 | O -4.84403114 | -0.90529086 | 1.09382536  |
| H 0.67967597  | 1.95461291  | -2.49559134 | O -4.63545708 | 1.62582090  | 1.81889590  |
| H -0.89717178 | 1.93342029  | -3.32556041 | C -5.07689368 | -2.27801433 | 0.83634281  |
| H -2.00048579 | 1.45409280  | 0.21277610  | H -5.09531924 | -2.84368280 | 1.77283205  |
| C -3.23522201 | 0.75411193  | -1.37955748 | H -4.31332295 | -2.69111693 | 0.17286975  |

|               |             |             |               |             |             |
|---------------|-------------|-------------|---------------|-------------|-------------|
| H -6.04512610 | -2.33175486 | 0.34215874  | H 6.29672967  | -0.61521691 | -3.61502996 |
| C -2.64592446 | -3.34043899 | -2.19188275 | C 4.02322739  | 1.51646044  | 3.19672710  |
| H -2.31300825 | -3.23542995 | -1.15575628 | H 3.77519811  | 1.43845367  | 4.25389004  |
| H -2.76805986 | -4.39069188 | -2.44629714 | H 4.49378276  | 2.48123169  | 2.99671712  |
| H -1.89845481 | -2.88324963 | -2.84540385 | H 4.70724381  | 0.71477810  | 2.91323073  |
| C 6.11643242  | -1.69145861 | -3.63701936 | H 6.49437007  | 1.17141935  | -0.94295627 |
| H 5.09640535  | -1.89306935 | -3.97863805 | H -5.27376174 | 1.13709051  | 1.28121228  |
| H 6.82749482  | -2.16870351 | -4.30844976 | H -5.96996060 | -2.60136274 | -2.73366806 |

**$\beta''$ - $\beta'''$  bottom $C_{\beta}$ - $C_{\gamma}$**

|              |             |             |               |             |             |
|--------------|-------------|-------------|---------------|-------------|-------------|
| C 2.17881617 | 3.94896519  | -1.21858862 | C 2.02510145  | -2.49551372 | -1.07618329 |
| C 2.44280564 | 2.01062310  | 0.76510800  | O 1.07739009  | -1.52838038 | -1.49977716 |
| C 1.08884956 | 3.64317567  | -0.40399631 | C 0.46560277  | -0.95550283 | -0.34017673 |
| C 3.37139611 | 3.24830973  | -1.08685913 | C 0.59796921  | -1.98377848 | 0.80292198  |
| C 3.50046701 | 2.26322955  | -0.11776956 | C 1.41018323  | -3.06699832 | 0.16855426  |
| C 1.24177513 | 2.69011283  | 0.59457905  | H 2.14417576  | -3.22711645 | -1.88013387 |
| H 4.21179356 | 3.43210307  | -1.74521285 | H 0.93527590  | -0.00457658 | -0.08257651 |
| H 0.42169855 | 2.46358905  | 1.26422662  | H -0.57524870 | -0.76556273 | -0.57760895 |
| O 4.68020940 | 1.54011072  | -0.06301112 | C -1.93480012 | -4.28167634 | 0.35612244  |
| C 4.57229543 | 0.16806902  | -0.22750170 | O -1.46510022 | -3.02701948 | 0.19830207  |
| C 4.44142811 | -2.58642436 | -0.25912875 | C -0.77954503 | -2.42587869 | 1.30216066  |
| C 5.65430637 | -0.56271813 | 0.25511910  | H -2.01624677 | -4.68546884 | 1.35835808  |
| C 3.45943416 | -0.45311164 | -0.76602182 | H -2.56609087 | -4.61443066 | -0.45516181 |
| C 3.36507987 | -1.83854073 | -0.73224231 | H -0.66221137 | -3.18275161 | 2.08705903  |
| C 5.59245656 | -1.95968052 | 0.20661475  | H 1.14491055  | -1.54861698 | 1.64936901  |
| H 4.40517610 | -3.66970854 | -0.21578092 | H 1.79089349  | -3.93546800 | 0.68839902  |
| H 2.65047950 | 0.13752015  | -1.17171604 | H 2.08955206  | 4.71587119  | -1.98133525 |

|               |             |             |               |             |             |
|---------------|-------------|-------------|---------------|-------------|-------------|
| C -0.24382188 | 4.32645388  | -0.61824117 | C -3.01858688 | -1.43398883 | 1.84023514  |
| O -1.06204048 | 4.11955717  | 0.52748204  | C -1.08249740 | -0.04333845 | 2.18248415  |
| C -2.40444003 | 3.88128152  | 0.13210824  | C -1.91067212 | 1.01719599  | 2.56106016  |
| C -2.28473571 | 3.14980361  | -1.19552387 | C -3.83649054 | -0.39137026 | 2.23233057  |
| C -1.07045777 | 3.82505983  | -1.85354220 | H -3.45118001 | -2.37311820 | 1.51775176  |
| H -0.06410142 | 5.40199551  | -0.73610751 | H -0.01107418 | 0.12362889  | 2.16311062  |
| H -2.88514444 | 3.30108158  | 0.92344215  | H -1.49898425 | 1.98400620  | 2.83048467  |
| H -2.94220655 | 4.82966744  | 0.00667449  | O 6.61184895  | -2.71782643 | 0.70711133  |
| H -3.18630793 | 3.21928241  | -1.80616449 | O 6.72706603  | 0.05863951  | 0.81664943  |
| H -1.35917542 | 4.67465955  | -2.47372261 | O 2.48809627  | 1.05952431  | 1.74194991  |
| C -0.49344602 | 2.69176457  | -2.69012941 | O -3.18454603 | -2.85598894 | -2.44236538 |
| O -0.69695435 | 1.51480921  | -1.92639942 | O -5.59142630 | -2.50236505 | -1.39477441 |
| C -1.81341477 | 1.68769156  | -1.05200319 | O -5.19731523 | -0.43025481 | 2.29970080  |
| H 0.57341633  | 2.77487549  | -2.89815388 | O -4.09770511 | 1.89630540  | 2.88021085  |
| H -1.03680892 | 2.62789716  | -3.64148697 | C -5.82428065 | -1.68968705 | 2.11186565  |
| H -1.42930611 | 1.53952092  | -0.03382146 | H -5.45800564 | -2.40873273 | 2.85052253  |
| C -2.87835841 | 0.63896371  | -1.28633587 | H -5.65165276 | -2.07197833 | 1.10286463  |
| C -4.71641185 | -1.45716676 | -1.38939777 | H -6.88869025 | -1.52127894 | 2.26012707  |
| C -4.15788536 | 0.79685010  | -0.76709762 | C -1.88213538 | -3.09295948 | -2.96406392 |
| C -2.53423766 | -0.56364448 | -1.91239898 | H -1.11971700 | -2.90671143 | -2.20326834 |
| C -3.43306581 | -1.61600701 | -1.93272229 | H -1.86698094 | -4.13876007 | -3.26412032 |
| C -5.08367299 | -0.24321387 | -0.83853259 | H -1.69925679 | -2.45882295 | -3.83604099 |
| H -4.44158684 | 1.72230132  | -0.27586612 | C 7.83762757  | -2.61322966 | -0.01149638 |
| H -1.54948541 | -0.66579110 | -2.34869830 | H 7.69232989  | -2.92511268 | -1.05026431 |
| H -6.08443127 | -0.13244589 | -0.43827912 | H 8.53630108  | -3.28905939 | 0.47794523  |
| C -1.62713645 | -1.26466070 | 1.80293423  | H 8.22627709  | -1.59424446 | 0.02088979  |
| C -3.28185944 | 0.85493818  | 2.56910439  | C 3.59679145  | 1.09592571  | 2.64172345  |



|              |            |            |               |             |             |
|--------------|------------|------------|---------------|-------------|-------------|
| H 3.22927037 | 0.72112758 | 3.59592581 | H 6.57640249  | 1.01047809  | 0.76513146  |
| H 3.95420293 | 2.12079215 | 2.76609328 | H -5.00663267 | 1.57132660  | 2.86545227  |
| H 4.40838562 | 0.45570394 | 2.29231408 | H -5.15879997 | -3.24050203 | -1.84168895 |

**$\beta''$ - $\beta'''$  bottomC<sub>y</sub>-O**

|              |             |             |               |             |             |
|--------------|-------------|-------------|---------------|-------------|-------------|
| C 2.12396095 | 3.95261533  | -1.43707793 | H 3.01613753  | -3.05796543 | -2.50580884 |
| C 2.25728052 | 2.12282560  | 0.66134566  | H 0.70623283  | -0.18642592 | -1.07736729 |
| C 0.98190503 | 3.67088818  | -0.69166996 | H -0.33729061 | -1.35750018 | -1.89700056 |
| C 3.32098247 | 3.29773244  | -1.16259391 | C 0.95040581  | -4.35315542 | -1.59006349 |
| C 3.38481089 | 2.37501388  | -0.13106053 | O -1.42953286 | -3.16625321 | -0.51565613 |
| C 1.06404135 | 2.76689992  | 0.36361285  | C -0.56332734 | -2.62548994 | 0.40217967  |
| H 4.21295004 | 3.47538285  | -1.75094073 | H 0.61026483  | -5.27215899 | -1.13340664 |
| H 0.19404901 | 2.54629338  | 0.96871508  | H 0.58109223  | -4.10524661 | -2.57683379 |
| O 4.57241090 | 1.70425375  | 0.09977787  | H -0.35899144 | -3.51026107 | 1.04811489  |
| C 4.55797737 | 0.33318467  | -0.09585730 | H 1.36765783  | -1.71074444 | 0.57808610  |
| C 4.67130138 | -2.41310829 | -0.30226936 | H 2.24772985  | -3.78741808 | 0.00689165  |
| C 5.58371143 | -0.34975344 | 0.55262491  | H 2.07945595  | 4.67164724  | -2.24798017 |
| C 3.61065891 | -0.32925097 | -0.85838580 | C -0.34748453 | 4.27908215  | -1.06542535 |
| C 3.65022305 | -1.71636818 | -0.94484384 | O -1.12386076 | 4.47983637  | 0.10888634  |
| C 5.64146816 | -1.74148697 | 0.43355281  | C -2.49187929 | 4.34885352  | -0.23460993 |
| H 4.73694174 | -3.49483312 | -0.35316866 | C -2.51442675 | 3.17978858  | -1.20910708 |
| H 2.84280831 | 0.22839575  | -1.37755324 | C -1.22633460 | 3.40258419  | -2.02724827 |
| C 2.56709894 | -2.45640495 | -1.71180104 | H -0.17018857 | 5.24905431  | -1.54691392 |
| O 1.65689926 | -1.55993397 | -2.32570884 | H -3.05055783 | 4.17526286  | 0.68615919  |
| C 0.62441165 | -1.22858251 | -1.39176382 | H -2.86221458 | 5.26580918  | -0.71190196 |
| C 0.77633285 | -2.19184367 | -0.20489997 | H -3.41425457 | 3.14485365  | -1.82372951 |
| C 1.66939559 | -3.32088848 | -0.79455514 | H -1.40942337 | 3.93578254  | -2.96063717 |

|               |             |             |               |             |             |
|---------------|-------------|-------------|---------------|-------------|-------------|
| C -0.74622701 | 1.98138107  | -2.27280310 | O 6.49383094  | 0.31286542  | 1.31696333  |
| O -1.07390331 | 1.27612820  | -1.08778525 | O 2.25347550  | 1.20932851  | 1.67263498  |
| C -2.25030712 | 1.82194228  | -0.50288855 | O -4.41263178 | -2.31283496 | -2.21442830 |
| H 0.33009186  | 1.88834818  | -2.43308337 | O -6.50116746 | -1.91235389 | -0.65534401 |
| H -1.27195426 | 1.55092708  | -3.13624091 | O -4.52310502 | -1.11490225 | 2.96434123  |
| H -2.02196763 | 2.00813398  | 0.55182432  | O -3.31425619 | 1.11106521  | 3.67406206  |
| C -3.39412042 | 0.83617454  | -0.56883540 | C -5.20322021 | -2.31708317 | 2.64767280  |
| C -5.49256536 | -0.99771335 | -0.63659564 | H -4.65692772 | -3.17961365 | 3.04090149  |
| C -4.51637806 | 1.02050635  | 0.22901286  | H -5.33736836 | -2.41891794 | 1.56847022  |
| C -3.31790856 | -0.27714909 | -1.40868750 | H -6.17691230 | -2.24962629 | 3.12775112  |
| C -4.36163456 | -1.18899717 | -1.44385790 | C -3.33815237 | -2.54281231 | -3.11052744 |
| C -5.56745913 | 0.10631574  | 0.19387716  | H -2.40392446 | -2.69366483 | -2.56475134 |
| H -4.56423392 | 1.86464250  | 0.91018323  | H -3.59016435 | -3.44901931 | -3.65654601 |
| H -2.42166174 | -0.43407166 | -1.99365595 | H -3.23776526 | -1.70765336 | -3.81016293 |
| H -6.44310407 | 0.22571208  | 0.82071969  | C 7.92907331  | -2.24005814 | 0.61802027  |
| C -1.26006400 | -1.58468082 | 1.28026646  | H 8.00140581  | -2.51104294 | -0.43971157 |
| C -2.62828179 | 0.22362262  | 2.90908367  | H 8.57122927  | -2.89246895 | 1.20652409  |
| C -2.57597962 | -1.85885077 | 1.68330782  | H 8.23073630  | -1.20102516 | 0.75835962  |
| C -0.64419382 | -0.41661221 | 1.70257429  | C 3.25887554  | 1.32946438  | 2.68000400  |
| C -1.32916414 | 0.48342723  | 2.52453603  | H 2.80058417  | 0.99780937  | 3.61071170  |
| C -3.25143070 | -0.96792392 | 2.49447737  | H 3.57763923  | 2.36962719  | 2.78032124  |
| H -3.05786411 | -2.76158106 | 1.32902066  | H 4.11677068  | 0.69399043  | 2.45533923  |
| H 0.36701158  | -0.16532764 | 1.41036091  | H 6.29729589  | 1.25599598  | 1.25743690  |
| H -0.85715032 | 1.39876888  | 2.86391147  | H -4.18624057 | 0.73446801  | 3.84633426  |
| O 6.60163880  | -2.45693427 | 1.08892390  | H -6.27656452 | -2.58099151 | -1.31440244 |

**$\beta''$ - $\beta'''$  bottomC $_{\alpha}$ -C $_{Ph}$   $\alpha$ -side**

|              |             |             |               |             |             |
|--------------|-------------|-------------|---------------|-------------|-------------|
| C 3.80871998 | 0.43032623  | 1.03681546  | C -0.28044579 | -0.54401845 | -0.70484086 |
| O 3.05083199 | -0.16693324 | 1.99340602  | C -2.93291687 | -0.91540221 | 0.08059538  |
| C 1.83196397 | -0.58993488 | 1.37931430  | C -1.06394001 | 0.56074783  | -0.36339455 |
| C 2.18764287 | -0.91501735 | -0.07868174 | C -0.83090595 | -1.81902094 | -0.65635518 |
| C 3.44388546 | -0.04167689 | -0.33896507 | C -2.15386136 | -2.00628587 | -0.26287870 |
| H 4.80416074 | 0.70058838  | 1.36142982  | C -2.38175507 | 0.37328383  | 0.02621712  |
| H 1.44920437 | -1.43900946 | 1.94238747  | H -0.62345128 | 1.54725537  | -0.41348703 |
| H 1.11274248 | 0.23311192  | 1.42695885  | H -0.22910736 | -2.67958459 | -0.92997193 |
| C 2.91435597 | 1.04979684  | -1.30167820 | H -2.59823784 | -2.99291069 | -0.22052001 |
| O 1.50035727 | 1.00020574  | -1.20417325 | O -3.25192420 | 1.36398036  | 0.38205637  |
| C 1.16539324 | -0.37099176 | -1.09398163 | O -4.22267600 | -1.08999196 | 0.46193331  |
| H 3.21809999 | 0.83124833  | -2.33361491 | C -2.77046340 | 2.69429817  | 0.35970185  |
| H 3.23789938 | 2.05392402  | -1.02990263 | H -2.45307984 | 2.97567535  | -0.64818662 |
| H 1.34050492 | -0.86261163 | -2.06352176 | H -1.93445750 | 2.81643707  | 1.05411496  |
| H 2.37747634 | -1.97930557 | -0.21617658 | H -3.60069908 | 3.32343226  | 0.67162136  |
| H 4.25636288 | -0.60151863 | -0.81181742 | H -4.59616891 | -0.22144674 | 0.65369767  |

**$\beta''$ - $\beta'''$  bottomC<sub>α</sub>-C<sub>Ph</sub> phenyl-side**

|               |             |             |               |             |             |
|---------------|-------------|-------------|---------------|-------------|-------------|
| C -0.18211460 | -3.37581197 | -1.59152628 | C -2.91786593 | -0.18583421 | -0.22939773 |
| C -1.12110707 | -2.40079392 | 0.85212541  | C -2.90522031 | 2.59171353  | -0.03006497 |
| C 0.66124138  | -3.35225907 | -0.47950176 | C -4.10494686 | 0.49427865  | 0.05943123  |
| C -1.45251460 | -2.82674134 | -1.50606262 | C -1.71177520 | 0.48739564  | -0.42101725 |
| C -1.89310699 | -2.28639555 | -0.30696530 | C -1.78299537 | 1.85457665  | -0.30406606 |
| C 0.15679637  | -2.94341785 | 0.74699516  | C -4.10103332 | 1.88829272  | 0.15355827  |
| H -2.09979412 | -2.75102077 | -2.37175601 | H -2.91263344 | 3.67103340  | 0.06188007  |
| H 0.75996246  | -2.99623599 | 1.64431464  | H -0.78795426 | -0.03945345 | -0.64214661 |
| O -3.07179626 | -1.55952666 | -0.29131197 | H 0.17360171  | -3.76705192 | -2.53863865 |

|              |             |             |               |             |             |
|--------------|-------------|-------------|---------------|-------------|-------------|
| C 2.13806893 | -3.63756612 | -0.64644401 | H 4.42737738  | 0.30092059  | 1.57904266  |
| O 2.78104726 | -3.88580421 | 0.59151827  | H 1.27690441  | 1.73618243  | -0.94299609 |
| C 3.38618761 | -2.69787442 | 1.10573245  | H 5.21254935  | 2.63242972  | 1.92851661  |
| C 3.34463999 | -1.64351529 | -0.00530114 | O -5.23555566 | 2.57087189  | 0.47579458  |
| C 2.92255698 | -2.43677023 | -1.25453099 | O -5.25914811 | -0.19481792 | 0.27344422  |
| H 2.26914882 | -4.52939306 | -1.26479990 | O -1.48793426 | -1.91383818 | 2.06247653  |
| H 2.85495383 | -2.36721826 | 2.00455320  | O 2.03255972  | 4.36051702  | -0.65282850 |
| H 4.41120035 | -2.94829354 | 1.38657544  | O 4.13854470  | 4.75227328  | 0.88761633  |
| H 4.32235957 | -1.18381308 | -0.14942236 | C 0.85274693  | 4.20453205  | -1.42022981 |
| H 3.78604942 | -2.81792490 | -1.80156803 | H 0.06036527  | 3.74278355  | -0.82392864 |
| C 2.15648826 | -1.38637479 | -2.04545952 | H 0.55381023  | 5.20487611  | -1.72461240 |
| O 1.45530987 | -0.63411534 | -1.06840039 | H 1.04313946  | 3.59218958  | -2.30630972 |
| C 2.26005675 | -0.53742915 | 0.10896605  | C -6.26300743 | 2.52299538  | -0.51169308 |
| H 1.42496890 | -1.77691327 | -2.75141236 | H -5.89700013 | 2.94011028  | -1.45474075 |
| H 2.86524281 | -0.74514242 | -2.58528563 | H -7.07698131 | 3.13744641  | -0.13225005 |
| H 1.58763566 | -0.74677873 | 0.94872346  | H -6.61147012 | 1.50088954  | -0.66527209 |
| C 2.80919334 | 0.86668891  | 0.27900553  | C -2.84816991 | -2.02729061 | 2.47311742  |
| C 3.70471227 | 3.48166928  | 0.69598603  | H -2.82735037 | -2.10676718 | 3.55871571  |
| C 3.90844259 | 1.11856551  | 1.09020435  | H -3.30697254 | -2.92318904 | 2.04831431  |
| C 2.14014266 | 1.93891365  | -0.32219246 | H -3.42049741 | -1.14279735 | 2.18776381  |
| C 2.58804174 | 3.23402787  | -0.11817353 | H -5.07162132 | -1.13253566 | 0.14371838  |
| C 4.35614246 | 2.42253475  | 1.29979541  | H 3.54918311  | 5.34252747  | 0.40280366  |

**$\beta''$ - $\beta'''$  top $C_\alpha$ - $C_\beta$**

|              |            |             |              |            |             |
|--------------|------------|-------------|--------------|------------|-------------|
| C 3.45536738 | 3.67180505 | -1.24051686 | C 4.33742748 | 2.60422445 | -1.33025564 |
| C 3.70775907 | 1.88724202 | 0.89164582  | C 4.42241881 | 1.68288897 | -0.29491541 |
| C 2.62070418 | 3.79069086 | -0.12877306 | C 2.78349342 | 2.92797001 | 0.94562238  |

|               |             |             |               |             |             |
|---------------|-------------|-------------|---------------|-------------|-------------|
| H 4.93171274  | 2.43210963  | -2.21958567 | H 3.35607076  | 4.36092192  | -2.07252343 |
| H 2.15240563  | 3.01747188  | 1.82029180  | C 1.41461502  | 4.68712736  | -0.20617260 |
| O 5.18777082  | 0.54603075  | -0.48705498 | O 0.87282871  | 4.90720116  | 1.08203029  |
| C 4.52071041  | -0.66818620 | -0.51507743 | C -0.50097833 | 5.20123500  | 0.91041156  |
| C 3.44780588  | -3.20959316 | -0.45513507 | C -0.99056441 | 4.22813932  | -0.16078085 |
| C 5.36975559  | -1.76564525 | -0.65027127 | C 0.26291725  | 4.04729808  | -1.06089236 |
| C 3.15039870  | -0.82567894 | -0.36727805 | H 1.68971826  | 5.65171134  | -0.65523637 |
| C 2.61344163  | -2.10620019 | -0.29679123 | H -0.99256714 | 5.08445287  | 1.87684073  |
| C 4.81591998  | -3.04883409 | -0.64594778 | H -0.62547781 | 6.23892764  | 0.57107419  |
| H 3.06226452  | -4.22325767 | -0.41170509 | H -1.84894798 | 4.61901924  | -0.70543441 |
| H 2.49948076  | 0.03245615  | -0.28086058 | H 0.17582893  | 4.54877153  | -2.02472559 |
| C 1.14851370  | -2.29460917 | 0.06887362  | C 0.34362909  | 2.52924203  | -1.20555516 |
| O 0.44212163  | -1.06230963 | 0.09067112  | O -0.08763965 | 2.05331493  | 0.05793250  |
| C 0.53042468  | -0.47706040 | 1.39848436  | C -1.26321038 | 2.78877525  | 0.36570751  |
| C 0.95466367  | -1.58893634 | 2.28893798  | H 1.33755775  | 2.12916416  | -1.39797593 |
| C 1.02519043  | -2.86078220 | 1.50798937  | H -0.33626210 | 2.19030221  | -1.99715077 |
| H 0.64687728  | -2.93648857 | -0.66236442 | H -1.35709215 | 2.78065747  | 1.45622262  |
| H 1.23836146  | 0.36012354  | 1.40688855  | C -2.48116486 | 2.12571842  | -0.26717601 |
| H -0.46109153 | -0.06675257 | 1.63260130  | C -4.66153842 | 0.88793829  | -1.49776668 |
| C -0.17295295 | -3.80886142 | 1.69064993  | C -3.71564334 | 2.76071790  | -0.32210121 |
| O -1.40823333 | -3.28921932 | 1.22134704  | C -2.34532467 | 0.84238244  | -0.80655230 |
| C -1.99970713 | -2.34868015 | 1.99958372  | C -3.41937794 | 0.23861444  | -1.44063833 |
| H -0.27023288 | -4.08488735 | 2.74711152  | C -4.80767670 | 2.13843645  | -0.92618825 |
| H -0.00618688 | -4.71714827 | 1.10796439  | H -3.84438938 | 3.74821147  | 0.10888311  |
| H -1.45077228 | -1.98938213 | 2.86084223  | H -1.38964534 | 0.33624432  | -0.73409028 |
| H 1.25079128  | -1.46863249 | 3.32037044  | H -5.78171733 | 2.61073917  | -0.96019412 |
| H 1.91318487  | -3.44472881 | 1.77133506  | C -3.27099880 | -1.85651016 | 1.65854198  |

|               |             |             |               |             |             |
|---------------|-------------|-------------|---------------|-------------|-------------|
| C -5.74226510 | -0.73769670 | 0.91712301  | H -4.62569248 | -3.31161928 | -1.96776674 |
| C -4.02325464 | -2.41694066 | 0.59666674  | H -6.35370306 | -3.68103600 | -2.22128930 |
| C -3.80991078 | -0.75017378 | 2.35631600  | C -2.14145130 | -1.67887297 | -1.98759072 |
| C -5.02256752 | -0.20573337 | 1.98365760  | H -1.82735173 | -1.83699554 | -0.95205090 |
| C -5.23303108 | -1.85999643 | 0.23611679  | H -2.30825943 | -2.63572495 | -2.48038140 |
| H -3.61798907 | -3.26896549 | 0.06854062  | H -1.36137330 | -1.12386504 | -2.51771370 |
| H -3.24690272 | -0.31071454 | 3.17235396  | C 6.27399770  | -4.29751144 | -2.00062286 |
| H -5.43162351 | 0.66053161  | 2.48922628  | H 5.53910978  | -4.35975514 | -2.80905286 |
| O 5.61131861  | -4.15336712 | -0.74721974 | H 6.83329984  | -5.22930901 | -1.94351625 |
| O 6.71496888  | -1.60094447 | -0.75468122 | H 6.95789727  | -3.46702612 | -2.18118048 |
| O 3.75823619  | 1.04745013  | 1.95766807  | C 5.02577541  | 0.53426663  | 2.36195550  |
| O -3.37790543 | -0.98230297 | -2.04983809 | H 4.97177135  | 0.41315260  | 3.44272940  |
| O -5.72504986 | 0.28532018  | -2.09870357 | H 5.82468663  | 1.23544906  | 2.11124790  |
| O -6.00743715 | -2.29593970 | -0.80582023 | H 5.22105269  | -0.43492268 | 1.89847805  |
| O -6.91730885 | -0.16614340 | 0.55405334  | H 6.89924263  | -0.65413127 | -0.72883003 |
| C -5.58996509 | -3.46965324 | -1.47565666 | H -7.08950889 | -0.38123352 | -0.37218010 |
| H -5.51520938 | -4.30928027 | -0.77880832 | H -5.46875863 | -0.61862578 | -2.32523022 |

**$\beta''$ - $\beta'''$  topC<sub>g</sub>-O**

|              |            |             |              |             |             |
|--------------|------------|-------------|--------------|-------------|-------------|
| C 1.74596086 | 3.53007547 | -2.24515798 | O 4.54858644 | 1.67547379  | -0.80049719 |
| C 2.33141568 | 2.11979673 | 0.08337283  | C 4.59630145 | 0.32389776  | -0.50086194 |
| C 0.76365751 | 3.36148892 | -1.27333223 | C 4.81545225 | -2.30803483 | 0.27996463  |
| C 3.00462215 | 2.95918014 | -2.07901071 | C 5.72307857 | -0.07446671 | 0.21225585  |
| C 3.29466678 | 2.24313177 | -0.92795385 | C 3.60430685 | -0.57244288 | -0.85759553 |
| C 1.07042504 | 2.66398201 | -0.10902187 | C 3.69561166 | -1.89247728 | -0.43725505 |
| H 3.77208942 | 3.04708862 | -2.83822309 | C 5.83368016 | -1.41528518 | 0.59449255  |
| H 0.31894846 | 2.53418977 | 0.65887583  | H 4.92116678 | -3.33420003 | 0.61643977  |

|               |             |             |               |             |             |
|---------------|-------------|-------------|---------------|-------------|-------------|
| H 2.75159990  | -0.23341754 | -1.43242727 | H -1.84380476 | 3.30813007  | -3.25599725 |
| C 2.53627016  | -2.83958024 | -0.67806922 | C -1.06056930 | 1.44731070  | -2.44134547 |
| O 1.74458120  | -2.42283185 | -1.77639766 | O -1.25699921 | 0.86733096  | -1.16277820 |
| C 0.57146968  | -1.74382769 | -1.33182136 | C -2.50380805 | 1.33368770  | -0.65767159 |
| C 0.63492497  | -1.67624746 | 0.20830672  | H -0.00062316 | 1.37062313  | -2.68816655 |
| C 1.58262466  | -2.85570183 | 0.53206547  | H -1.64755276 | 0.91413337  | -3.20209687 |
| H 2.91600758  | -3.84170642 | -0.89909472 | H -2.35872365 | 1.47907422  | 0.41732572  |
| H 0.53381479  | -0.74422945 | -1.76852414 | C -3.61207942 | 0.31776105  | -0.86620499 |
| H -0.30080310 | -2.31363222 | -1.66447502 | C -5.65277303 | -1.57391666 | -1.12682248 |
| C 0.85829781  | -4.22518014 | 0.69440684  | C -4.92358453 | 0.64077983  | -0.53657293 |
| O 0.11731408  | -4.46806606 | -0.42761376 | C -3.31751530 | -0.96594488 | -1.33111240 |
| C -0.70981917 | -1.72447164 | 0.84529503  | C -4.33061698 | -1.90598128 | -1.46049223 |
| H 0.20678296  | -4.13165921 | 1.57521946  | C -5.94324419 | -0.30011716 | -0.66930405 |
| H 1.62356674  | -4.99551128 | 0.85717200  | H -5.16082822 | 1.63071333  | -0.15950377 |
| H -1.33899481 | -2.56692076 | 0.57151709  | H -2.28918597 | -1.21108678 | -1.56239647 |
| H 1.16065373  | -0.75957281 | 0.48787201  | H -6.96979884 | -0.06278959 | -0.41659993 |
| H 2.11883404  | -2.69158956 | 1.46900851  | C -1.27496570 | -0.74033386 | 1.68589262  |
| H 1.52624473  | 4.08816836  | -3.14943362 | C -2.54558579 | 1.25665645  | 3.21972221  |
| C -0.64212677 | 3.85736876  | -1.49750776 | C -2.64591341 | -0.86050602 | 2.05441055  |
| O -1.26741292 | 4.06459151  | -0.24057143 | C -0.56606682 | 0.39316533  | 2.15073312  |
| C -2.66069002 | 3.88937099  | -0.40964056 | C -1.19847380 | 1.37165440  | 2.90264415  |
| C -2.78192924 | 2.69765211  | -1.35124735 | C -3.26493198 | 0.11918871  | 2.79515281  |
| C -1.56998423 | 2.87425494  | -2.29403836 | H -3.20629400 | -1.71503353 | 1.69459846  |
| H -0.60412088 | 4.81059089  | -2.04159488 | H 0.48364054  | 0.51329261  | 1.91597960  |
| H -3.09727443 | 3.72331816  | 0.57686026  | H -0.66141504 | 2.24666241  | 3.25050437  |
| H -3.10964129 | 4.78696649  | -0.85659800 | O 6.89884617  | -1.84342136 | 1.33293109  |
| H -3.73170296 | 2.68112486  | -1.88547166 | O 6.68681300  | 0.82016674  | 0.56269945  |

|               |             |             |               |             |             |
|---------------|-------------|-------------|---------------|-------------|-------------|
| O 2.56993885  | 1.40961894  | 1.22862228  | H -2.43664117 | -3.00885991 | -3.01893363 |
| O -4.17740323 | -3.18760089 | -1.90207713 | C 8.14660898  | -1.81688712 | 0.64476743  |
| O -6.63923758 | -2.49920361 | -1.24813285 | H 8.10124526  | -2.45878814 | -0.24025189 |
| O -4.57491436 | 0.12336816  | 3.17922906  | H 8.88673935  | -2.20663351 | 1.34091864  |
| O -3.16941962 | 2.22280318  | 3.93663613  | H 8.41305787  | -0.79950890 | 0.35446089  |
| C -5.34073615 | -1.03207411 | 2.88265904  | C 3.53023374  | 1.97988414  | 2.11505478  |
| H -4.90282340 | -1.91309567 | 3.36100500  | H 3.55446438  | 1.33680966  | 2.99239383  |
| H -5.40592338 | -1.18807322 | 1.80290570  | H 3.22401327  | 2.98976243  | 2.40176897  |
| H -6.33395840 | -0.84967488 | 3.28655529  | H 4.52387878  | 2.00825939  | 1.66326571  |
| C -2.86585979 | -3.62357574 | -2.22234573 | H 6.45143078  | 1.67285995  | 0.17691528  |
| H -2.21469276 | -3.59678224 | -1.34471227 | H -4.08293034 | 1.94292367  | 4.07487092  |
| H -2.96314095 | -4.65008372 | -2.56720120 | H -6.24285921 | -3.30908958 | -1.59199515 |

**$\beta''$ - $\beta'''$  top $C_{\beta}$ - $C_{\gamma}$**

|              |             |             |               |             |             |
|--------------|-------------|-------------|---------------|-------------|-------------|
| C 1.90732480 | 4.11296678  | -1.18212726 | C 3.57897674  | -1.60190087 | -0.93959833 |
| C 2.19962962 | 2.19862088  | 0.82773254  | C 5.86460866  | -1.48835744 | -0.13471951 |
| C 0.82372795 | 3.78550609  | -0.37043739 | H 4.94980587  | -3.27482267 | -0.81944075 |
| C 3.12159720 | 3.45713300  | -1.02168609 | H 2.50082483  | 0.26662409  | -0.95493828 |
| C 3.26133529 | 2.49328919  | -0.03579134 | C 2.43403066  | -2.47970857 | -1.40910678 |
| C 0.98165630 | 2.83959005  | 0.63757931  | O 1.43805289  | -1.78838919 | -2.14964256 |
| H 3.97009428 | 3.66480160  | -1.66216985 | C 0.52824420  | -0.97553104 | -1.55273407 |
| H 0.14977237 | 2.57417086  | 1.27592490  | C 1.43164973  | -2.60314927 | 0.97447395  |
| O 4.47229524 | 1.83463473  | 0.07621659  | C 1.89822118  | -3.34192218 | -0.23639546 |
| C 4.49875105 | 0.48319443  | -0.20811304 | H 2.83395001  | -3.18051184 | -2.14741249 |
| C 4.79750912 | -2.21357756 | -0.65262696 | H -0.12994386 | -0.49570683 | -2.26025922 |
| C 5.71491209 | -0.12225262 | 0.10742083  | H 0.28603733  | -1.06016923 | -0.50475735 |
| C 3.43374787 | -0.23376098 | -0.73104499 | C 0.66940352  | -4.20446123 | -0.59183635 |



|               |             |             |               |             |             |
|---------------|-------------|-------------|---------------|-------------|-------------|
| O -0.43592979 | -3.64695500 | 0.10047307  | C -3.33500107 | -0.31416019 | -1.09138007 |
| C 0.03611735  | -3.02781221 | 1.30244102  | C -4.33474702 | -1.23091271 | -1.37559981 |
| H 0.82514492  | -5.24185948 | -0.27284548 | C -6.01212566 | 0.35405511  | -0.68671786 |
| H 0.43440565  | -4.18733865 | -1.65804382 | H -5.27432213 | 2.25789112  | -0.02630665 |
| H 0.05791837  | -3.79676408 | 2.09755765  | H -2.28977212 | -0.57624281 | -1.19376794 |
| H 2.08711174  | -2.07081598 | 1.64801484  | H -7.05789616 | 0.59065500  | -0.53236141 |
| H 2.74493160  | -3.98974986 | 0.02414977  | C -0.94292681 | -1.94771697 | 1.70828292  |
| H 1.79847848  | 4.86366870  | -1.95740294 | C -2.82683283 | -0.02106650 | 2.41870923  |
| C -0.53156872 | 4.37840780  | -0.65326178 | C -2.30986784 | -2.26021920 | 1.67177933  |
| O -1.27813622 | 4.47644917  | 0.54965249  | C -0.53315959 | -0.68523932 | 2.10783258  |
| C -2.64903115 | 4.43901806  | 0.19762589  | C -1.47976988 | 0.27217492  | 2.48000967  |
| C -2.72576733 | 3.34577183  | -0.86096638 | C -3.24549085 | -1.29843745 | 2.00580565  |
| C -1.40947539 | 3.53863227  | -1.64758596 | H -2.61800772 | -3.24604121 | 1.34578732  |
| H -0.40078117 | 5.38410387  | -1.07482357 | H 0.51478480  | -0.40958650 | 2.10793283  |
| H -3.22175508 | 4.22405318  | 1.10081320  | H -1.17756691 | 1.26487338  | 2.79365114  |
| H -2.96753711 | 5.40769131  | -0.21166055 | O 7.02335978  | -2.13632741 | 0.18002744  |
| H -3.61418390 | 3.41710819  | -1.48843448 | O 6.72976907  | 0.59485605  | 0.65732152  |
| H -1.54704678 | 4.07743799  | -2.58537672 | O 2.27801416  | 1.25105571  | 1.80382728  |
| C -0.94933620 | 2.10522011  | -1.86904196 | O -4.13209086 | -2.50109182 | -1.83546747 |
| O -1.29329860 | 1.44222126  | -0.66565618 | O -6.65226487 | -1.81809639 | -1.42492795 |
| C -2.56524763 | 1.92752907  | -0.24800904 | O -4.59763599 | -1.44384824 | 1.95067312  |
| H 0.12454577  | 1.98773612  | -2.02095711 | O -3.75170064 | 0.92844454  | 2.71755951  |
| H -1.48582196 | 1.66420582  | -2.72211310 | C -5.11051622 | -2.69746554 | 1.53787396  |
| H -2.52106809 | 2.00814068  | 0.84081753  | H -4.86274430 | -3.47146464 | 2.27099291  |
| C -3.66867006 | 0.95412672  | -0.61347014 | H -4.71711141 | -2.97893088 | 0.55725002  |
| C -5.68126848 | -0.90000149 | -1.17019185 | H -6.18946020 | -2.57643282 | 1.47076664  |
| C -5.00610061 | 1.27886180  | -0.41133559 | C -2.78899472 | -2.88077752 | -2.11425405 |

|               |             |             |               |             |             |
|---------------|-------------|-------------|---------------|-------------|-------------|
| H -2.16895173 | -2.83782664 | -1.21515043 | C 3.40112593  | 1.29012585  | 2.68338656  |
| H -2.83797275 | -3.90434788 | -2.47996400 | H 3.04525847  | 0.93193063  | 3.64867309  |
| H -2.36346382 | -2.23280917 | -2.88668867 | H 3.77348926  | 2.31157922  | 2.78871683  |
| C 8.15724359  | -1.73766988 | -0.58637988 | H 4.20121633  | 0.63731947  | 2.32771166  |
| H 7.97086704  | -1.91142986 | -1.65056193 | H 6.43657656  | 1.51144445  | 0.73168199  |
| H 8.98363985  | -2.36275862 | -0.25386737 | H -4.62080149 | 0.57039338  | 2.49208570  |
| H 8.39677016  | -0.68719191 | -0.41621839 | H -6.22637719 | -2.59539398 | -1.80670964 |

**$\beta''$ - $\beta'''$  topC<sub>v</sub>-O**

|              |             |             |               |             |             |
|--------------|-------------|-------------|---------------|-------------|-------------|
| C 1.65518653 | 4.04866192  | -1.25927167 | O 1.97323330  | -2.40590138 | -2.43934620 |
| C 2.25724433 | 1.99985450  | 0.52234751  | C 0.44236750  | -0.90151400 | -0.50778362 |
| C 0.70192529 | 3.64710215  | -0.32492155 | C 1.10871758  | -1.77800135 | 0.49895125  |
| C 2.88338203 | 3.40389305  | -1.33728394 | C 1.78041615  | -3.02225859 | -0.09865941 |
| C 3.18615523 | 2.37616015  | -0.45535035 | H 3.12593731  | -3.74297313 | -1.59700365 |
| C 1.01511389 | 2.62095428  | 0.55935099  | H -0.07384413 | -0.00261759 | -0.20355652 |
| H 3.62664275 | 3.68637692  | -2.07276198 | H 0.51401212  | -1.09593218 | -1.57267260 |
| H 0.29463270 | 2.29804584  | 1.30179988  | C 0.58292120  | -3.95077617 | -0.32423151 |
| O 4.44433788 | 1.80796326  | -0.53583874 | O -0.38212727 | -3.59319339 | 0.66792651  |
| C 4.56125842 | 0.43009253  | -0.54562301 | C 0.09536996  | -2.48297328 | 1.43034408  |
| C 4.97579525 | -2.28708702 | -0.37613412 | H 0.84144480  | -5.00635436 | -0.20952917 |
| C 5.74286302 | -0.04066919 | 0.02771735  | H 0.14976509  | -3.79379640 | -1.31708101 |
| C 3.60850341 | -0.42845001 | -1.06312381 | H 0.63741418  | -2.86685683 | 2.30672063  |
| C 3.80488732 | -1.80185675 | -0.94975451 | H 1.81699415  | -1.19020431 | 1.09173704  |
| C 5.95387568 | -1.41901493 | 0.09887203  | H 2.43218094  | -3.45245836 | 0.66804840  |
| H 5.15550917 | -3.35246041 | -0.27417198 | H 1.43377351  | 4.86101902  | -1.94432655 |
| H 2.70183493 | -0.03023720 | -1.50292977 | C -0.65552734 | 4.30967336  | -0.29613216 |
| C 2.69048545 | -2.75937069 | -1.32929814 | O -1.28909491 | 4.02738066  | 0.94469291  |

|               |             |             |               |             |             |
|---------------|-------------|-------------|---------------|-------------|-------------|
| C -2.69054051 | 3.94658590  | 0.73876505  | C -1.78526436 | 0.52107444  | 2.76910554  |
| C -2.82159747 | 3.26283053  | -0.61366577 | C -3.39256167 | -1.11032343 | 2.02002349  |
| C -1.65139493 | 3.85810842  | -1.42016753 | H -2.57469872 | -2.96156146 | 1.27592603  |
| H -0.51106541 | 5.39446219  | -0.38182209 | H 0.27641006  | -0.04876692 | 2.58241929  |
| H -3.11936928 | 3.37416938  | 1.56400998  | H -1.58082470 | 1.50788343  | 3.17056608  |
| H -3.13568717 | 4.94999766  | 0.72011560  | O 7.07190375  | -1.92838700 | 0.69230279  |
| H -3.78323576 | 3.43618413  | -1.09621907 | O 6.66205708  | 0.81976239  | 0.54044382  |
| H -1.95484517 | 4.71443056  | -2.02349523 | O 2.52354837  | 1.00370814  | 1.42376233  |
| C -1.22555512 | 2.67583285  | -2.27675335 | O -3.94051259 | -2.72775709 | -1.93214000 |
| O -1.34691289 | 1.55827478  | -1.41821475 | O -6.48366196 | -2.10320525 | -1.54502126 |
| C -2.46484020 | 1.76152398  | -0.54555915 | O -4.72186474 | -1.35303792 | 1.84995209  |
| H -0.19522459 | 2.71384409  | -2.63124241 | O -4.10629389 | 1.04984300  | 2.76290588  |
| H -1.89928415 | 2.57899916  | -3.13862443 | C -5.11167118 | -2.66477067 | 1.48387607  |
| H -2.09578577 | 1.52551830  | 0.45824263  | H -4.83292432 | -3.37631937 | 2.26720318  |
| C -3.58374973 | 0.79427415  | -0.87028561 | H -4.65595529 | -2.96475164 | 0.53686038  |
| C -5.54199961 | -1.14484770 | -1.33561154 | H -6.19245217 | -2.63743169 | 1.36428357  |
| C -4.92491040 | 1.07549668  | -0.64453684 | C -2.57777904 | -3.12421673 | -2.01998693 |
| C -3.21801948 | -0.47897640 | -1.32076722 | H -2.06829096 | -2.97875587 | -1.06175085 |
| C -4.18438799 | -1.44144681 | -1.54001246 | H -2.58777636 | -4.18083759 | -2.27902997 |
| C -5.90512289 | 0.11002525  | -0.88678470 | H -2.06001164 | -2.55936858 | -2.80098267 |
| H -5.22874186 | 2.04531035  | -0.26730618 | C 8.28975597  | -1.65455251 | 0.00377485  |
| H -2.16847025 | -0.69779373 | -1.46582789 | H 8.25090367  | -2.07002385 | -1.00772777 |
| H -6.95528626 | 0.31713659  | -0.72045951 | H 9.07691967  | -2.14746340 | 0.57087916  |
| C -1.03955054 | -1.60130724 | 1.88529488  | H 8.48287111  | -0.58185128 | -0.04053166 |
| C -3.10151075 | 0.16247303  | 2.52911625  | C 3.49657395  | 1.33604312  | 2.41158241  |
| C -2.36618548 | -1.98771649 | 1.69782233  | H 3.59650385  | 0.46031965  | 3.05040645  |
| C -0.75522470 | -0.35902817 | 2.44523668  | H 3.15679163  | 2.19170495  | 3.00174459  |

|              |            |            |               |             |             |
|--------------|------------|------------|---------------|-------------|-------------|
| H 4.46507723 | 1.56117364 | 1.95918856 | H -4.92976209 | 0.63775876  | 2.46987300  |
| H 6.35410767 | 1.71745186 | 0.36377550 | H -6.03551603 | -2.88558472 | -1.88904149 |

**$\beta''$ - $\beta'''$  topC $_{\alpha}$ -C $_{\beta}$   $\alpha$ -side**

|               |             |             |               |             |             |
|---------------|-------------|-------------|---------------|-------------|-------------|
| C 0.99254658  | 3.87764960  | -1.40471831 | H 0.75581478  | -0.49412336 | 1.34832174  |
| C 1.90119501  | 2.47718307  | 0.83318923  | H -0.95508592 | -0.95769868 | 1.22102399  |
| C 0.15368648  | 3.69516318  | -0.30661001 | C 0.18059809  | -4.51413513 | 0.15761131  |
| C 2.25741417  | 3.30415321  | -1.41327199 | O -0.65844780 | -4.71348346 | 1.29307192  |
| C 2.69427257  | 2.57850936  | -0.31605259 | C -0.74189807 | -3.52815872 | 1.95989237  |
| C 0.62176155  | 3.02387297  | 0.81642198  | H 0.65781624  | -5.46547863 | -0.07338390 |
| H 2.90548334  | 3.36802769  | -2.27902716 | H -0.44182380 | -4.20223499 | -0.68903057 |
| H -0.01949158 | 2.87809744  | 1.67587677  | H -1.26940784 | -3.58565687 | 2.90198438  |
| O 3.89404275  | 1.89291575  | -0.40565286 | H 1.05979460  | -2.48200153 | 2.54544100  |
| C 3.79944133  | 0.51298959  | -0.45322946 | H 2.11869067  | -3.79963524 | 0.86251415  |
| C 3.84776965  | -2.24389730 | -0.43939162 | H 0.63997481  | 4.42121453  | -2.27458920 |
| C 5.02749247  | -0.14071388 | -0.35803828 | C -1.29646444 | 4.07442648  | -0.41326975 |
| C 2.60937107  | -0.18885330 | -0.54889603 | O -1.85450223 | 4.27963096  | 0.87125504  |
| C 2.62686032  | -1.57906685 | -0.51348662 | C -3.25206503 | 4.11229178  | 0.73170111  |
| C 5.04493235  | -1.53683648 | -0.37253336 | C -3.41168075 | 2.88376647  | -0.16153346 |
| H 3.91127472  | -3.32617811 | -0.42488255 | C -2.17698001 | 2.97162940  | -1.09763390 |
| H 1.66366941  | 0.33044090  | -0.62359822 | H -1.39162835 | 5.00062849  | -0.99768013 |
| C 1.30932464  | -2.34104869 | -0.57740809 | H -3.68025722 | 3.99794930  | 1.72803819  |
| O 0.18725203  | -1.49181189 | -0.38623756 | H -3.69333880 | 4.99774231  | 0.25299118  |
| C 0.06484809  | -1.27966188 | 1.02324462  | H -4.35659345 | 2.88756902  | -0.70326544 |
| C 0.42541280  | -2.63379967 | 1.66767651  | H -2.43110777 | 3.26593955  | -2.11598769 |
| C 1.16374017  | -3.39585292 | 0.53239189  | C -1.61472038 | 1.55315602  | -1.04182909 |
| H 1.19711049  | -2.78313492 | -1.57236402 | O -1.87114787 | 1.13350202  | 0.28884173  |

|               |             |             |               |             |             |
|---------------|-------------|-------------|---------------|-------------|-------------|
| C -3.19796578 | 1.53896724  | 0.58964462  | O -4.37672794 | -3.04551122 | -0.93903409 |
| H -0.54383746 | 1.47070266  | -1.22280542 | O -6.95215459 | -2.48964106 | -0.77815096 |
| H -2.14572647 | 0.90986074  | -1.75530973 | C -3.01083752 | -3.42589592 | -0.90556617 |
| H -3.23205800 | 1.69231061  | 1.67261114  | H -2.60860621 | -3.33374402 | 0.10735149  |
| C -4.20515548 | 0.46532710  | 0.20304389  | H -2.97858983 | -4.46736168 | -1.21945120 |
| C -6.05870797 | -1.52205293 | -0.45227157 | H -2.41704746 | -2.81104194 | -1.58920921 |
| C -5.57022667 | 0.71623554  | 0.27553224  | C 7.12255866  | -2.06368590 | -1.33714271 |
| C -3.76109666 | -0.80020186 | -0.19248206 | H 6.65329951  | -2.39728251 | -2.26774040 |
| C -4.68216496 | -1.78277371 | -0.52395627 | H 7.98045256  | -2.69514768 | -1.11467337 |
| C -6.49622912 | -0.27385867 | -0.04722448 | H 7.44317773  | -1.02542953 | -1.43240871 |
| H -5.92838913 | 1.68968254  | 0.59478491  | C 3.59838164  | 1.90465243  | 2.41985666  |
| H -2.69683773 | -0.99771696 | -0.24295593 | H 3.53792317  | 1.78786742  | 3.50078581  |
| H -7.56245772 | -0.09260930 | 0.00976157  | H 3.99619386  | 2.89325980  | 2.18019809  |
| O 6.21747178  | -2.22388975 | -0.24788170 | H 4.25033783  | 1.13119880  | 2.00897774  |
| O 6.18337376  | 0.56130932  | -0.22221423 | H 5.96276358  | 1.50070260  | -0.24040268 |
| O 2.26593955  | 1.76443032  | 1.93056953  | H -6.45477671 | -3.28320402 | -1.01039496 |

**$\beta''$ - $\beta'''$  topC<sub>α</sub>-C<sub>Ph</sub> phenyl-side**

|               |             |             |               |             |             |
|---------------|-------------|-------------|---------------|-------------|-------------|
| C 1.27974544  | -1.71944302 | 0.00028561  | H 2.64260346  | 1.35037661  | -0.00051952 |
| C 0.56524598  | 0.90280970  | -0.00012778 | O -1.70210334 | 0.39153052  | 0.00047518  |
| C -0.07046909 | -1.44052601 | 0.00011263  | O 0.20615846  | 2.21238988  | 0.00028944  |
| C 2.28585477  | -0.79257049 | -0.00016297 | C -2.75849885 | -0.54875395 | -0.00037006 |
| C 1.90525833  | 0.55648930  | -0.00018395 | H -2.71922322 | -1.17717379 | 0.89405468  |
| C -0.42685588 | -0.09393581 | -0.00000721 | H -2.71770760 | -1.17724661 | -0.89460310 |
| H -0.81439462 | -2.22690055 | 0.00060901  | H -3.68042572 | 0.02770010  | -0.00134732 |
| H 3.33209001  | -1.07150412 | -0.00047738 | H -0.75706750 | 2.25896677  | -0.00111091 |
